# Supplementary material
Source: publisher figshare collection journal article supplement (https://acs.figshare.com/ndownloader/files/3665394)
Supplement: Supplementary file 1 [file 3665394]

data_5-carboxyvanillate


_symmetry_space_group_name_hall   '-P 2ybc'
#Added by publCIF

# Loop of author details

loop_
_publ_author_name    Yury Patskovsky
_publ_author_address 
_publ_author_footnote
?
;
Department of Biochemistry
Institution: Albert Einstein College of Medicine
Address: 1300 Morris Park ave
City:    Bronx
State:   NY
Zip/Post code:  10461
Country:  USA
;
.      # Add footnote if necessary


_audit_update_record
;
2014-10-28 # Formatted by publCIF

;

# publcif _publ_body_element loop start
loop_
_publ_body_element
_publ_body_title
_publ_body_contents

 section 
;
Introduction
; 
;

;
 section 
;
Experimental
; 
;

;
 subsection 
;
Synthesis and crystallization
; 
;

;
 subsection 
;
Refinement
;
;
Crystal data, data collection and structure refinement details are summarized
in Table 1.
;

 section 
;
Results and discussion
; 
;

;
# publcif _publ_body_element loop end
 
_audit_creation_method            SHELXL-2014
_chemical_name_systematic
?
_chemical_name_common             5-caroxyvanillate
_chemical_melting_point           ?
_chemical_formula_moiety          ?
_chemical_formula_sum
 'C9 H7 O6' 
_chemical_formula_weight          211.15

loop_
 _atom_type_symbol
 _atom_type_description
 _atom_type_scat_dispersion_real
 _atom_type_scat_dispersion_imag
 _atom_type_scat_source
 'C'  'C'   0.0061   0.0000
 'International Tables Vol C Tables 4.2.6.8 and 6.1.1.4'
 'H'  'H'   0.0000   0.0000
 'International Tables Vol C Tables 4.2.6.8 and 6.1.1.4'
 'O'  'O'   0.0192   0.0000
 'International Tables Vol C Tables 4.2.6.8 and 6.1.1.4'
 
_space_group_crystal_system       monoclinic
_space_group_IT_number            14
_space_group_name_H-M_alt         'P 21/c'
_space_group_name_Hall            '-P 2ybc'
 
_shelx_space_group_comment
;
The symmetry employed for this shelxl refinement is uniquely defined
by the following loop, which should always be used as a source of
symmetry information in preference to the above space-group names.
They are only intended as comments.
;
 
loop_
 _space_group_symop_operation_xyz
 'x, y, z'
 '-x, y+1/2, -z+1/2'
 '-x, -y, -z'
 'x, -y-1/2, z-1/2'
 
_cell_length_a                    3.661(12)
_cell_length_b                    18.351(16)
_cell_length_c                    15.687(10)
_cell_angle_alpha                 90
_cell_angle_beta                  93.930(10)
_cell_angle_gamma                 90
_cell_volume                      1051(4)
_cell_formula_units_Z             4
_cell_measurement_temperature     93(2)
_cell_measurement_reflns_used     100 
_cell_measurement_theta_min       ? 
_cell_measurement_theta_max       ? 
 
_exptl_crystal_description        needle 
_exptl_crystal_colour             clear 
_exptl_crystal_density_meas       ? 
_exptl_crystal_density_method     ?              
_exptl_crystal_density_diffrn     1.334          
_exptl_crystal_F_000              436
_exptl_transmission_factor_min    ?                                             
_exptl_transmission_factor_max    ?                                             
_exptl_crystal_size_max           ? 
_exptl_crystal_size_mid           ? 
_exptl_crystal_size_min           ? 
_exptl_absorpt_coefficient_mu     0.179
_shelx_estimated_absorpt_T_min    ? 
_shelx_estimated_absorpt_T_max    ? 
_exptl_absorpt_correction_type    ? 
_exptl_absorpt_correction_T_min   ? 
_exptl_absorpt_correction_T_max   ? 
_exptl_absorpt_process_details    ? 
 
_exptl_special_details
?
 
_diffrn_ambient_temperature       93(2)
_diffrn_radiation_wavelength      0.920
_diffrn_radiation_type            X-RAY
_diffrn_source                    synchrotron                       
_diffrn_measurement_device_type   area detector 
_diffrn_measurement_method        scans 
_diffrn_detector_area_resol_mean  1 
_diffrn_reflns_number             8224
_diffrn_reflns_av_unetI/netI      0.0538
_diffrn_reflns_av_R_equivalents   0.0937
_diffrn_reflns_limit_h_min        -3
_diffrn_reflns_limit_h_max        3
_diffrn_reflns_limit_k_min        -19
_diffrn_reflns_limit_k_max        19
_diffrn_reflns_limit_l_min        -16
_diffrn_reflns_limit_l_max        16
_diffrn_reflns_theta_min          2.214
_diffrn_reflns_theta_max          28.627
_diffrn_reflns_theta_full         33.504
_diffrn_measured_fraction_theta_max   0.989
_diffrn_measured_fraction_theta_full  0.641
_diffrn_reflns_Laue_measured_fraction_max    0.989
_diffrn_reflns_Laue_measured_fraction_full   0.641
_diffrn_reflns_point_group_measured_fraction_max   0.989
_diffrn_reflns_point_group_measured_fraction_full  0.641
_reflns_number_total              1225
_reflns_number_gt                 980
_reflns_threshold_expression      'I > 2\s(I)'
_reflns_Friedel_coverage          0.000
_reflns_Friedel_fraction_max      .
_reflns_Friedel_fraction_full     .
 
_reflns_special_details
;
 Reflections were merged by SHELXL according to the crystal
 class for the calculation of statistics and refinement.
 
 _reflns_Friedel_fraction is defined as the number of unique
 Friedel pairs measured divided by the number that would be
 possible theoretically, ignoring centric projections and
 systematic absences.
;
 
_computing_data_collection        CBASS
_computing_cell_refinement        XDS
_computing_data_reduction         XDS
_computing_structure_solution     SHELXS
_computing_structure_refinement   'SHELXL-2014 (Sheldrick, 2014)'
_computing_molecular_graphics     WinGX
_computing_publication_material   Mercury
 
_refine_special_details
?
_refine_ls_structure_factor_coef  Fsqd
_refine_ls_matrix_type            full
_refine_ls_weighting_scheme       calc
_refine_ls_weighting_details
'w=1/[\s^2^(Fo^2^)+(0.0300P)^2^+6.0500P] where P=(Fo^2^+2Fc^2^)/3'
_atom_sites_solution_primary      direct
_atom_sites_solution_secondary    difmap
_atom_sites_solution_hydrogens    mixed
_refine_ls_hydrogen_treatment     mixed
_refine_ls_extinction_method      SHELXL
_refine_ls_extinction_coef        0.000(4)
_refine_ls_extinction_expression
 'Fc^*^=kFc[1+0.001xFc^2^\l^3^/sin(2\q)]^-1/4^'
_refine_ls_number_reflns          1225
_refine_ls_number_parameters      178
_refine_ls_number_restraints      2
_refine_ls_R_factor_all           0.0878
_refine_ls_R_factor_gt            0.0738
_refine_ls_wR_factor_ref          0.1697
_refine_ls_wR_factor_gt           0.1620
_refine_ls_goodness_of_fit_ref    0.997
_refine_ls_restrained_S_all       0.996
_refine_ls_shift/su_max           1.329
_refine_ls_shift/su_mean          0.008
 
loop_
 _atom_site_label
 _atom_site_type_symbol
 _atom_site_fract_x
 _atom_site_fract_y
 _atom_site_fract_z
 _atom_site_U_iso_or_equiv
 _atom_site_adp_type
 _atom_site_occupancy
 _atom_site_site_symmetry_order  
 _atom_site_calc_flag
 _atom_site_refinement_flags_posn
 _atom_site_refinement_flags_adp
 _atom_site_refinement_flags_occupancy
 _atom_site_disorder_assembly
 _atom_site_disorder_group
O_2 O -0.4908(14) 0.5729(2) 0.5798(2) 0.0453(13) Uani 1 1 d D . . . .
H2_2 H -0.268(14) 0.571(5) 0.615(5) 0.12(4) Uiso 1 1 d D . . . .
H3_2 H -0.576(16) 0.5256(18) 0.594(4) 0.06(2) Uiso 1 1 d D . . . .
O_3a O -0.248(13) 1.0135(5) 0.4393(14) 0.093(11) Uani 0.63(6) 1 d . . P A 1
O_3b O -0.503(15) 1.0147(9) 0.403(3) 0.080(13) Uani 0.37(6) 1 d . . P A 2
CAK_1 C 0.3104(19) 0.7164(3) 0.0416(3) 0.0472(18) Uani 1 1 d . . . . .
HAK1_1 H 0.0986 0.7473 0.0256 0.071 Uiso 1 1 calc R U . . .
HAK2_1 H 0.3778 0.6887 -0.0084 0.071 Uiso 1 1 calc R U . . .
HAK3_1 H 0.5170 0.7469 0.0625 0.071 Uiso 1 1 calc R U . . .
OAI_1 O 0.2197(11) 0.6672(2) 0.1072(2) 0.0379(11) Uani 1 1 d . . . . .
CAB_1 C 0.1019(15) 0.6979(3) 0.1802(3) 0.0290(14) Uani 1 1 d . . . . .
CAC_1 C 0.0598(14) 0.7700(3) 0.1947(3) 0.0291(14) Uani 1 1 d . . . . .
HAC_1 H 0.1185 0.8044 0.1525 0.035 Uiso 1 1 calc R U . . .
CAD_1 C -0.0710(15) 0.7940(3) 0.2721(3) 0.0309(14) Uani 1 1 d . . . . .
CAJ_1 C -0.1221(16) 0.8721(3) 0.2871(3) 0.0355(15) Uani 1 1 d . . . . .
OAN_1 O -0.0646(12) 0.9196(2) 0.2358(2) 0.0448(12) Uani 1 1 d . . . . .
OAO_1 O -0.2301(14) 0.8860(2) 0.3644(2) 0.0503(13) Uani 1 1 d . . . . .
HAO_1 H -0.2720 0.9308 0.3689 0.076 Uiso 1 1 calc R U . . .
CAE_1 C -0.1521(15) 0.7434(3) 0.3328(3) 0.0295(14) Uani 1 1 d . . . . .
HAE_1 H -0.2407 0.7596 0.3851 0.035 Uiso 1 1 calc R U . . .
CAF_1 C -0.1078(15) 0.6703(3) 0.3194(3) 0.0297(14) Uani 1 1 d . . . . .
CAH_1 C -0.1957(16) 0.6158(3) 0.3852(3) 0.0325(15) Uani 1 1 d . . . . .
OAM_1 O -0.1400(12) 0.5509(2) 0.3761(2) 0.0415(12) Uani 1 1 d . . . . .
OAL_1 O -0.3317(11) 0.6452(2) 0.4515(2) 0.0369(11) Uani 1 1 d . . . . .
HAL_1 H -0.3865 0.6124 0.4857 0.055 Uiso 1 1 calc R U . . .
CAA_1 C 0.0185(15) 0.6461(3) 0.2419(3) 0.0301(14) Uani 1 1 d . . . . .
OAG_1 O 0.0683(13) 0.5770(2) 0.2218(2) 0.0465(12) Uani 1 1 d . . . . .
HAG_1 H 0.0263 0.5505 0.2637 0.070 Uiso 1 1 calc R U . . .
 
loop_
 _atom_site_aniso_label
 _atom_site_aniso_U_11
 _atom_site_aniso_U_22
 _atom_site_aniso_U_33
 _atom_site_aniso_U_23
 _atom_site_aniso_U_13
 _atom_site_aniso_U_12
O_2 0.075(3) 0.041(3) 0.020(2) 0.0089(19) 0.000(2) -0.007(2)
O_3a 0.22(3) 0.030(5) 0.032(8) 0.000(4) 0.028(12) 0.005(7)
O_3b 0.15(3) 0.046(9) 0.045(18) -0.011(8) 0.023(19) 0.014(11)
CAK_1 0.061(4) 0.061(4) 0.019(3) 0.007(3) -0.002(3) -0.001(3)
OAI_1 0.057(3) 0.041(2) 0.015(2) 0.0004(17) 0.0028(18) -0.005(2)
CAB_1 0.035(3) 0.039(4) 0.012(3) 0.000(3) -0.008(2) -0.004(3)
CAC_1 0.034(3) 0.041(4) 0.010(3) 0.002(2) -0.012(2) -0.004(3)
CAD_1 0.037(3) 0.037(3) 0.017(3) 0.002(3) -0.012(2) -0.001(3)
CAJ_1 0.045(4) 0.043(4) 0.017(3) 0.005(3) -0.006(3) -0.004(3)
OAN_1 0.075(3) 0.038(2) 0.021(2) 0.007(2) 0.002(2) -0.003(2)
OAO_1 0.092(4) 0.040(2) 0.020(2) -0.0018(18) 0.006(2) 0.005(3)
CAE_1 0.037(3) 0.039(4) 0.011(3) -0.001(3) -0.012(2) -0.003(3)
CAF_1 0.037(3) 0.036(4) 0.014(3) 0.001(2) -0.008(2) -0.004(3)
CAH_1 0.041(4) 0.039(4) 0.016(3) -0.007(3) -0.009(3) -0.001(3)
OAM_1 0.072(3) 0.031(3) 0.021(2) -0.0017(18) 0.0046(19) 0.001(2)
OAL_1 0.061(3) 0.036(2) 0.014(2) 0.0042(17) 0.0003(19) 0.000(2)
CAA_1 0.041(4) 0.025(3) 0.023(3) -0.005(3) -0.007(3) 0.000(3)
OAG_1 0.072(3) 0.042(3) 0.026(2) 0.004(2) 0.003(2) -0.002(2)
 
_geom_special_details
;
 All esds (except the esd in the dihedral angle between two l.s. planes)
 are estimated using the full covariance matrix.  The cell esds are taken
 into account individually in the estimation of esds in distances, angles
 and torsion angles; correlations between esds in cell parameters are only
 used when they are defined by crystal symmetry.  An approximate (isotropic)
 treatment of cell esds is used for estimating esds involving l.s. planes.
;
 
loop_
 _geom_bond_atom_site_label_1
 _geom_bond_atom_site_label_2
 _geom_bond_distance
 _geom_bond_site_symmetry_2
 _geom_bond_publ_flag
CAK_1 OAI_1 1.424(7) . ?
OAI_1 CAB_1 1.373(6) . ?
CAB_1 CAC_1 1.352(8) . ?
CAB_1 CAA_1 1.405(7) . ?
CAC_1 CAD_1 1.407(8) . ?
CAD_1 CAE_1 1.377(7) . ?
CAD_1 CAJ_1 1.466(8) . ?
CAJ_1 OAN_1 1.213(6) . ?
CAJ_1 OAO_1 1.326(7) . ?
CAE_1 CAF_1 1.370(8) . ?
CAF_1 CAA_1 1.403(7) . ?
CAF_1 CAH_1 1.488(8) . ?
CAH_1 OAM_1 1.217(7) . ?
CAH_1 OAL_1 1.301(7) . ?
CAA_1 OAG_1 1.321(6) . ?
 
loop_
 _geom_angle_atom_site_label_1
 _geom_angle_atom_site_label_2
 _geom_angle_atom_site_label_3
 _geom_angle
 _geom_angle_site_symmetry_1
 _geom_angle_site_symmetry_3
 _geom_angle_publ_flag
CAB_1 OAI_1 CAK_1 116.4(4) . . ?
CAC_1 CAB_1 OAI_1 125.9(5) . . ?
CAC_1 CAB_1 CAA_1 120.9(5) . . ?
OAI_1 CAB_1 CAA_1 113.1(5) . . ?
CAB_1 CAC_1 CAD_1 120.0(5) . . ?
CAE_1 CAD_1 CAC_1 119.2(5) . . ?
CAE_1 CAD_1 CAJ_1 120.8(5) . . ?
CAC_1 CAD_1 CAJ_1 120.0(5) . . ?
OAN_1 CAJ_1 OAO_1 123.0(5) . . ?
OAN_1 CAJ_1 CAD_1 124.4(5) . . ?
OAO_1 CAJ_1 CAD_1 112.6(5) . . ?
CAF_1 CAE_1 CAD_1 121.4(5) . . ?
CAE_1 CAF_1 CAA_1 119.5(5) . . ?
CAE_1 CAF_1 CAH_1 121.3(5) . . ?
CAA_1 CAF_1 CAH_1 119.2(5) . . ?
OAM_1 CAH_1 OAL_1 125.2(5) . . ?
OAM_1 CAH_1 CAF_1 122.0(5) . . ?
OAL_1 CAH_1 CAF_1 112.8(5) . . ?
OAG_1 CAA_1 CAF_1 124.7(5) . . ?
OAG_1 CAA_1 CAB_1 116.5(5) . . ?
CAF_1 CAA_1 CAB_1 118.9(5) . . ?
 
_refine_diff_density_max    0.529
_refine_diff_density_min   -0.351
_refine_diff_density_rms    0.073

_shelxl_version_number 2014-1

_shelx_res_file
;
TITL test1 in P2(1)/c
CELL 0.92000   3.6610  18.3510  15.6870  90.000  93.930  90.000
ZERR    4.00   0.0120   0.0160   0.0095   0.000   0.010   0.000
LATT  1
SYMM -X, 0.5+Y, 0.5-Z
SFAC  C  H  O
DISP C 0.00610 0.00290  14.94
DISP H 0.00000 0.00000   0.67
DISP O 0.01920 0.01070  55.32
UNIT 36 28 24

L.S. 20
BOND
BUMP
FMAP 2
PLAN 20
MERG 4
REM OMIT 0 3 14
TEMP  -180.00

REM SWAT    0.955273    0.0024

ACTA

WGHT    0.030000    6.050000
EXTI    0.000000
FVAR       0.96604   0.50000   0.36909
MOLE   1

RESI    2   HOH
O     3   -0.490814    0.572899    0.579764    11.00000    0.07478    0.04069 =
         0.02003    0.00893    0.00040   -0.00742
H2    2   -0.267663    0.570976    0.615414    11.00000    0.12250
H3    2   -0.576499    0.525552    0.593572    11.00000    0.05827
DFIX 0.96 O_2 H2_2 O_2 H3_2

RESI    3   HOH
PART    1
O     3   -0.248250    1.013536    0.439285   -31.00000    0.21879    0.03016 =
         0.03212   -0.00018    0.02810    0.00486
PART    2
O     3   -0.502687    1.014709    0.403239    31.00000    0.15136    0.04553 =
         0.04543   -0.01122    0.02301    0.01401

RESI    1   DRG
PART    0
CAK   1    0.310355    0.716379    0.041611    11.00000    0.06102    0.06138 =
         0.01852    0.00652   -0.00239   -0.00084
AFIX 137
HAK1  2    0.098623    0.747343    0.025558    11.00000   -1.50000
HAK2  2    0.377788    0.688683   -0.008365    11.00000   -1.50000
HAK3  2    0.517048    0.746926    0.062520    11.00000   -1.50000
AFIX   0
OAI   3    0.219705    0.667248    0.107166    11.00000    0.05685    0.04147 =
         0.01535    0.00040    0.00284   -0.00454
CAB   1    0.101890    0.697940    0.180229    11.00000    0.03471    0.03903 =
         0.01201    0.00019   -0.00766   -0.00370
CAC   1    0.059774    0.770002    0.194664    11.00000    0.03411    0.04097 =
         0.01020    0.00230   -0.01228   -0.00358
AFIX  43
HAC   2    0.118521    0.804419    0.152483    11.00000   -1.20000
AFIX   0
CAD   1   -0.070977    0.794041    0.272102    11.00000    0.03679    0.03709 =
         0.01689    0.00187   -0.01178   -0.00100
CAJ   1   -0.122108    0.872117    0.287086    11.00000    0.04459    0.04348 =
         0.01720    0.00500   -0.00638   -0.00408
OAN   3   -0.064582    0.919565    0.235839    11.00000    0.07507    0.03793 =
         0.02125    0.00714    0.00164   -0.00295
OAO   3   -0.230095    0.886039    0.364371    11.00000    0.09201    0.03972 =
         0.01959   -0.00184    0.00581    0.00506
AFIX 147
HAO   2   -0.271971    0.930829    0.368888    11.00000   -1.50000
AFIX   0
CAE   1   -0.152115    0.743435    0.332836    11.00000    0.03701    0.03859 =
         0.01121   -0.00109   -0.01163   -0.00291
AFIX  43
HAE   2   -0.240654    0.759596    0.385133    11.00000   -1.20000
AFIX   0
CAF   1   -0.107846    0.670276    0.319430    11.00000    0.03750    0.03639 =
         0.01373    0.00130   -0.00811   -0.00353
CAH   1   -0.195651    0.615751    0.385170    11.00000    0.04114    0.03868 =
         0.01613   -0.00671   -0.00891   -0.00128
OAM   3   -0.139985    0.550913    0.376062    11.00000    0.07199    0.03140 =
         0.02133   -0.00167    0.00459    0.00118
OAL   3   -0.331655    0.645244    0.451471    11.00000    0.06114    0.03554 =
         0.01374    0.00422    0.00026   -0.00006
AFIX 147
HAL   2   -0.386485    0.612419    0.485663    11.00000   -1.50000
AFIX   0
CAA   1    0.018498    0.646096    0.241877    11.00000    0.04150    0.02511 =
         0.02253   -0.00519   -0.00679   -0.00011
OAG   3    0.068343    0.577037    0.221834    11.00000    0.07180    0.04204 =
         0.02559    0.00354    0.00345   -0.00193
AFIX 147
HAG   2    0.026259    0.550541    0.263712    11.00000   -1.50000

AFIX   0
HKLF 4

REM  test1 in P2(1)/c
REM R1 =  0.0738 for     980 Fo > 4sig(Fo)  and  0.0878 for all    1225 data
REM    178 parameters refined using      2 restraints

END

WGHT      0.1034      2.7963

REM Highest difference peak  0.529,  deepest hole -0.351,  1-sigma level  0.073
Q1    1   0.2043  0.8005  0.1307  11.00000  0.05    0.53
Q2    1  -0.1506  1.0502  0.4131  11.00000  0.05    0.29
Q3    1  -0.0199  0.8573  0.2196  11.00000  0.05    0.27
Q4    1  -0.6436  0.6420  0.4309  11.00000  0.05    0.25
Q5    1   0.1947  0.6463  0.0370  11.00000  0.05    0.24
Q6    1  -0.3583  1.0594  0.3659  11.00000  0.05    0.21
Q7    1  -0.0132  0.6510  0.4780  11.00000  0.05    0.21
Q8    1   0.2773  0.6115  0.0789  11.00000  0.05    0.21
Q9    1   0.0702  0.8928  0.2005  11.00000  0.05    0.21
Q10   1  -0.5695  1.0218  0.4865  11.00000  0.05    0.20
Q11   1   0.1969  0.7418  0.3496  11.00000  0.05    0.19
Q12   1  -0.5151  0.5516  0.3433  11.00000  0.05    0.19
Q13   1  -0.0596  0.7873  0.3147  11.00000  0.05    0.19
Q14   1   0.0027  0.9075  0.1806  11.00000  0.05    0.19
Q15   1  -0.0550  0.5030  0.3552  11.00000  0.05    0.19
Q16   1   0.1881  0.5196  0.1858  11.00000  0.05    0.18
Q17   1  -0.3627  0.6697  0.2969  11.00000  0.05    0.18
Q18   1  -0.6951  1.0343  0.4206  11.00000  0.05    0.18
Q19   1  -0.2187  0.5083  0.3929  11.00000  0.05    0.17
Q20   1  -0.8198  1.0018  0.3777  11.00000  0.05    0.17
;
_shelx_res_checksum   53674

_shelx_hkl_file
;
  -2   0   0  26.528   6.588
  -2   0   0  20.445   8.046
   2   0   0  22.870   7.005
   2   0   0  33.202   6.584
  -3   0   0  54.108  10.430
  -3   0   0  82.536  10.903
   3   0   0  78.223  12.464
   3   0   0  87.374  11.777
   0   1   0 -0.0840  2.4744
   0   1   0  0.8017  2.3140
   0  -1   0  1.8751  2.3602
   0  -1   0  0.4369  2.4192
   1   1   0  872.20   87.07
   1   1   0  886.19   88.47
  -1  -1   0  877.21   87.57
  -1  -1   0  894.15   89.30
  -1   1   0 1074.08  106.75
  -1   1   0 1021.08  101.49
   1  -1   0  921.10   91.60
   1  -1   0 1032.37  102.60
   2   1   0  105.19   12.72
   2   1   0  108.55   14.07
  -2  -1   0  110.69   15.64
  -2  -1   0  98.501  12.286
  -2   1   0  108.13   12.50
  -2   1   0  118.96   13.44
   2  -1   0  124.68   13.81
   2  -1   0  128.47   14.22
   3   1   0  15.067   8.811
   3   1   0  10.940   7.480
  -3  -1   0  19.225  10.594
  -3  -1   0  19.277   7.534
  -3   1   0  24.436   6.846
  -3   1   0  21.792   6.318
   3  -1   0  19.071   7.229
   3  -1   0  25.848  10.163
   0   2   0  916.99   90.88
   0   2   0  629.38   62.54
   0  -2   0  821.76   81.48
   0  -2   0  639.65   63.58
   1   2   0 1626.07  161.45
   1   2   0 1558.05  154.78
  -1  -2   0 1547.79  153.88
  -1  -2   0 1500.30  149.26
  -1   2   0 1549.07  153.50
  -1   2   0 1597.84  158.24
   1  -2   0 1778.80  176.21
   1  -2   0 1649.17  163.38
   2   2   0  131.42   17.67
   2   2   0  99.207  12.639
  -2  -2   0  99.412  15.016
  -2  -2   0  101.62   13.26
  -2   2   0  117.20   13.21
  -2   2   0  119.33   13.30
   2  -2   0  126.25   14.61
   2  -2   0  115.66   13.10
   3   2   0  15.465   8.210
   3   2   0  4.7627  8.1393
  -3  -2   0  21.779   7.933
  -3  -2   0  25.694  12.208
  -3   2   0  12.491   8.085
  -3   2   0  14.579   8.125
   3  -2   0  24.616  10.478
   3  -2   0  19.071   8.153
   0   3   0  7.0087  6.9240
   0   3   0  7.2179  6.5826
   0  -3   0  1.3296  6.3760
   0  -3   0  -6.825   6.767
   1   3   0 3615.35  357.68
   1   3   0 3877.16  383.48
  -1  -3   0 3635.88  359.74
  -1  -3   0 3442.09  340.62
  -1   3   0 4017.05  396.96
  -1   3   0 3718.02  367.44
   1  -3   0 4017.05  396.96
   1  -3   0 3892.56  384.64
   2   3   0  67.417  10.561
   2   3   0  61.629  10.251
  -2  -3   0  57.073  11.806
  -2  -3   0  66.339  11.066
  -2   3   0  56.136   7.572
  -2   3   0  69.535  10.123
   2  -3   0  67.494   8.250
   2  -3   0  75.451   9.235
   3   3   0  9.0031  8.9312
   3   3   0  9.8655  8.3254
  -3  -3   0 -0.7521  8.4923
  -3  -3   0  -1.530   8.351
  -3   3   0  -6.521   7.495
   3  -3   0  7.3744  7.8557
   0   4   0 2528.31  250.26
   0   4   0 2199.75  217.79
   0  -4   0 2125.32  210.48
   0  -4   0 2570.66  254.37
   1   4   0  125.61   16.30
   1   4   0  167.23   20.19
  -1  -4   0  142.33   18.01
  -1  -4   0  150.16   18.69
  -1   4   0  134.12   15.04
  -1   4   0  150.54   16.38
   1  -4   0  153.75   16.57
   1  -4   0  143.48   15.75
   2   4   0  91.468  12.563
   2   4   0  98.270  13.412
  -2  -4   0  100.08   14.64
  -2  -4   0  100.72   14.39
  -2   4   0  99.720  11.886
  -2   4   0  110.26   12.74
   2  -4   0  95.126  11.551
   2  -4   0  100.44   11.63
   3   4   0 -0.1586  9.7436
   3   4   0  11.810   8.604
  -3  -4   0  5.1413  9.7295
  -3  -4   0  1.3027  9.5421
  -3   4   0  10.208   6.473
   3  -4   0  5.9152  5.3518
   3  -4   0   6.767  10.269
   0   5   0  23.255  14.464
   0   5   0  22.113  14.156
   0  -5   0  18.635  13.976
   1   5   0  75.541  12.566
   1   5   0  87.220  16.055
  -1  -5   0  80.777  13.283
  -1  -5   0  90.929  16.594
  -1   5   0  86.514  11.004
  -1   5   0  84.037  10.845
   1  -5   0  67.956   9.429
   1  -5   0  94.523  11.612
   2   5   0  239.74   28.52
   2   5   0  208.94   24.83
  -2  -5   0  175.18   21.11
  -2  -5   0  158.63   20.75
  -2   5   0  194.44   20.68
  -2   5   0  171.46   18.57
   2  -5   0  167.23   18.21
   2  -5   0  181.60   19.38
   3   5   0  14.528   9.224
   3   5   0  14.182  13.245
  -3  -5   0  14.823  11.467
  -3  -5   0  18.212  10.949
  -3   5   0  10.942   7.455
   0   6   0  993.10   99.57
   0   6   0  780.18   78.65
   0  -6   0  807.39   81.41
   0  -6   0  829.46   83.58
   1   6   0  287.61   31.15
   1   6   0  280.30   32.37
  -1  -6   0  377.45   41.17
  -1  -6   0  270.28   30.07
  -1   6   0  303.65   31.39
  -1   6   0  338.05   35.14
   1  -6   0  295.44   31.38
   1  -6   0  359.74   36.97
   2   6   0  365.26   38.30
   2   6   0  383.99   40.32
  -2  -6   0  368.47   39.13
  -2  -6   0  363.20   38.50
  -2   6   0  382.33   38.82
  -2   6   0  400.81   40.80
   2  -6   0  375.01   38.07
   2  -6   0  415.31   42.29
   3   6   0  44.123  12.298
   3   6   0  69.612  18.763
  -3  -6   0  48.192  12.962
  -3  -6   0  42.596  13.245
  -3   6   0  21.741   8.722
   0   7   0   5.621  10.487
   0   7   0  11.820   9.667
   0  -7   0   3.816  10.111
   0  -7   0  -9.187   9.845
   1   7   0 1509.28  150.41
   1   7   0 1518.27  151.18
  -1  -7   0 1907.14  189.82
  -1  -7   0 1669.71  166.33
  -1   7   0 1463.08  145.41
  -1   7   0 1545.22  153.37
   1  -7   0 1637.62  162.74
   1  -7   0 1719.76  171.08
   2   7   0  34.729  13.566
   2   7   0  52.119  15.491
  -2  -7   0  26.990  13.874
  -2  -7   0  37.912  11.599
  -2   7   0  32.496   8.741
  -2   7   0  29.518   6.438
   2  -7   0  43.315   8.924
   2  -7   0  29.518   8.506
   3   7   0  92.238  16.209
   3   7   0  117.20   16.97
  -3  -7   0  116.73   18.64
  -3  -7   0  143.87   23.13
  -3   7   0  82.164  11.902
   0   8   0  77.235  16.941
   0   8   0  76.414  15.991
   0  -8   0  107.45   18.51
   0  -8   0  98.322  19.302
   1   8   0  177.49   21.19
   1   8   0  188.40   22.47
  -1  -8   0  211.38   25.00
  -1  -8   0  213.05   25.14
  -1   8   0  229.22   25.96
  -1   8   0  162.74   20.33
   1  -8   0  204.96   23.78
   1  -8   0  134.89   17.98
   2   8   0  399.01   42.38
   2   8   0  351.52   37.50
  -2  -8   0  476.78   49.85
  -2  -8   0  454.07   48.11
  -2   8   0  357.94   36.92
  -2   8   0  345.62   35.56
   2  -8   0  332.79   34.64
   2  -8   0  370.52   38.16
   3   8   0   8.393  12.683
   3   8   0  -7.060  14.810
  -3  -8   0   8.967  17.544
  -3  -8   0   8.290  12.873
  -3   8   0  15.003  10.163
   0   9   0 -0.0835  9.5049
   0   9   0  14.336   9.917
   0  -9   0  -4.711  10.852
   0  -9   0  -2.483  11.058
   1   9   0  552.12   56.66
   1   9   0  650.81   66.47
  -1  -9   0  462.54   48.64
  -1  -9   0  604.10   62.17
  -1   9   0  634.51   64.32
  -1   9   0  587.29   59.85
   1  -9   0  614.49   62.57
   1  -9   0  664.42   67.26
   2   9   0   7.942  12.561
   2   9   0  16.363  11.705
  -2  -9   0  18.134  11.363
  -2  -9   0  30.840  13.797
  -2   9   0  19.636   7.014
  -2   9   0  9.1892  6.2835
   2  -9   0  6.3528  6.9625
   2  -9   0  16.338   7.141
   3   9   0   9.016  12.400
   3   9   0  13.886  11.244
  -3  -9   0  -6.861  13.193
  -3  -9   0  -4.400  13.258
  -3   9   0  13.874   9.614
   0  10   0  177.75   21.25
   0  10   0  190.33   22.05
   0 -10   0  231.40   26.91
   0 -10   0  178.91   21.74
   1  10   0  15.529  10.627
   1  10   0  0.2501  9.8861
  -1 -10   0   7.636  10.909
  -1 -10   0   7.960  11.567
  -1  10   0  -3.517   8.058
  -1  10   0  9.3984  7.6979
   1 -10   0  7.5657  7.9969
   1 -10   0  12.463   8.060
   2  10   0  -6.992  11.024
   2  10   0  -6.530  10.928
  -2 -10   0   0.714  12.249
  -2 -10   0  -4.447  13.219
  -2  10   0  7.1203  6.7212
  -2  10   0  3.6551  9.7552
   2 -10   0  10.963   7.242
   2 -10   0  13.848   7.437
   3  10   0   5.362  17.993
   3  10   0   3.446  11.759
  -3 -10   0  -1.613  14.490
  -3 -10   0  -0.733  12.911
  -3  10   0  -10.93   12.23
   0  11   0  10.148   9.291
   0  11   0  -6.434  12.332
   0 -11   0   5.963  13.835
   0 -11   0  -3.967  11.721
   1  11   0   2.356  10.073
   1  11   0  10.911   9.790
  -1 -11   0  -0.611  11.914
  -1 -11   0  10.809  11.268
  -1  11   0   9.072  10.466
  -1  11   0  1.3976  7.8082
   1 -11   0  2.5976  9.6563
   1 -11   0  -9.871  11.715
   2  11   0  36.384  16.877
   2  11   0  42.211  13.181
  -2 -11   0  41.865  17.441
  -2 -11   0  22.845  15.273
  -2  11   0  29.416   8.006
  -2  11   0  20.406   8.033
   2 -11   0  31.995  13.245
   2 -11   0  27.478   9.249
   3  11   0  30.558  14.990
   3  11   0  27.799  16.120
  -3 -11   0  41.672  18.032
  -3 -11   0  32.188  15.452
   0  12   0  190.97   22.36
   0  12   0  163.51   20.37
   0 -12   0  184.81   22.77
   0 -12   0  169.02   21.65
   1  12   0  -13.96   10.08
   1  12   0   0.553  10.960
  -1 -12   0   1.606  12.118
  -1 -12   0  -13.58   12.35
  -1  12   0  -4.814   8.929
  -1  12   0  3.3561  8.8324
   1 -12   0  0.9939  9.3201
   1 -12   0  -5.388   9.799
   2  12   0  50.168  17.557
   2  12   0  60.153  13.732
  -2 -12   0  69.291  16.235
  -2 -12   0  80.623  18.712
  -2  12   0  35.165  10.097
  -2  12   0  85.321  40.722
   2 -12   0  60.461  12.282
   2 -12   0  44.662  14.297
   0  13   0  -2.373  10.023
   0  13   0  -10.42    9.62
   0 -13   0  -6.380  11.548
   0 -13   0   1.958  11.750
   1  13   0  111.10   16.53
   1  13   0  145.92   19.25
  -1 -13   0  126.76   19.60
  -1  13   0  78.377  13.091
  -1  13   0  87.130  13.527
   1 -13   0  103.63   15.54
   1 -13   0  97.256  15.298
   2  13   0   7.973  18.532
   2  13   0   2.065  11.920
  -2 -13   0   1.137  15.722
  -2 -13   0  -8.746  15.003
  -2  13   0   1.792  13.732
   2 -13   0  10.639  15.452
   2 -13   0   2.012  12.426
   0  14   0  482.17   50.35
   0  14   0  495.39   51.75
   0 -14   0  552.89   57.84
   0 -14   0  583.69   60.63
   1  14   0   1.448  16.017
   1  14   0  12.698  11.887
  -1 -14   0   3.428  14.361
  -1 -14   0   7.736  19.059
  -1  14   0  16.312  10.380
  -1  14   0   6.366  10.487
   1 -14   0  13.450  11.670
   1 -14   0   4.230  11.571
   2  14   0  309.81   35.94
   2  14   0  290.05   35.11
  -2 -14   0  319.05   37.12
  -2 -14   0  348.96   40.67
   2 -14   0  230.63   28.11
   0  15   0  -4.923  10.162
   0  15   0  -0.951  12.280
   0 -15   0  -12.90   12.79
   0 -15   0   3.595  14.028
   1  15   0  405.81   43.29
   1  15   0  337.41   38.89
  -1 -15   0  577.28   60.83
  -1 -15   0  407.61   48.32
  -1  15   0  367.57   39.61
  -1  15   0  467.03   49.41
   1 -15   0  387.72   42.06
   1 -15   0  346.90   38.21
   2  15   0  105.25   21.14
   2  15   0  113.45   19.96
  -2 -15   0  90.839  20.637
  -2 -15   0  155.16   25.58
  -2  15   0  99.079  19.610
  -2  15   0  57.599  13.848
   2 -15   0  57.561  16.286
   2 -15   0  91.815  17.185
   0  16   0  63.888  14.374
   0  16   0  52.119  14.387
   0 -16   0  66.134  17.121
   0 -16   0  50.579  16.286
   1  16   0   0.939  12.484
   1  16   0  18.468  13.527
  -1 -16   0   2.139  16.312
  -1 -16   0   2.477  15.670
  -1  16   0   9.092  12.411
  -1  16   0   5.596  12.285
   1 -16   0   8.505  12.772
   1 -16   0  16.402  13.822
   2  16   0  15.478  15.632
   2  16   0  21.343  16.748
  -2 -16   0  31.187  20.355
  -2 -16   0  44.842  19.238
  -2  16   0  28.928  15.465
  -2  16   0   9.310  15.388
   2 -16   0   9.632  16.184
   2 -16   0  -9.600  14.297
   0  17   0  -15.88   12.55
   0  17   0  11.246  15.606
   0 -17   0  -6.058  15.234
   0 -17   0   5.818  20.380
   1  17   0  -17.06   15.20
   1  17   0  -13.18   15.67
  -1 -17   0  -4.982  18.147
  -1 -17   0   9.193  17.891
  -1  17   0  19.367  18.224
  -1  17   0  16.517  20.008
   1 -17   0  -10.30   16.34
   0  18   0  -4.109  14.053
   0  18   0   1.921  13.976
   0 -18   0  -0.392  14.990
   1  18   0  15.876  17.390
   1  18   0   8.730  16.107
  -1 -18   0  -8.490  18.828
  -1 -18   0  -8.175  20.586
  -1  18   0   5.546  13.899
  -1  18   0   4.113  14.438
   1 -18   0   6.190  16.312
   1 -18   0   3.339  15.414
   0  19   0   3.728  14.554
   0  19   0  -12.31   16.45
   0 -19   0  14.810  18.917
   0 -19   0  14.849  16.248
  -3   0   1  10.980   5.421
  -3   0   1  15.606  10.175
   3   0  -1  11.039   6.156
   3   0  -1  9.0891  6.3362
  -2   0   1  2.7503  4.7678
  -2   0   1  5.5212  4.4521
   2   0  -1  6.7661  4.3918
   2   0  -1  4.6562  4.2391
  -1   0   1  3.3163  6.4260
   1   0  -1  5.5186  4.2468
   1   0  -1  7.9212  4.3931
   0   0  -1  2.2177  2.7144
   0   0   1  2.3884  2.7773
  -1   0  -1  64.594  10.292
  -1   0  -1  58.421  10.157
   1   0   1  63.233  10.289
   1   0   1  69.329  10.546
  -2   0  -1  15.362   7.070
  -2   0  -1  12.873   9.069
   2   0   1  6.8572  9.2097
   2   0   1  16.684   8.316
  -3   0  -1  24.359  31.354
  -3   0  -1  4.0312  7.2333
   3   0   1  6.6583  7.3783
   3   0   1  0.3537  7.3321
   3   1  -1  89.543  13.874
   3   1  -1  99.823  12.663
  -3  -1   1  98.039  12.316
  -3  -1   1  101.17   12.52
  -3   1   1  115.96   13.49
  -3   1   1  96.281  12.568
   3  -1  -1  126.77   14.71
   3  -1  -1  93.265  11.828
   2   1  -1  7.9635  6.7379
   2   1  -1  8.9967  4.9129
  -2  -1   1  1.5439  5.3890
  -2  -1   1  3.0134  5.5302
  -2   1   1  13.014   4.126
  -2   1   1  9.8938  3.9388
   2  -1  -1  10.020   3.869
   2  -1  -1  7.9545  3.6115
   1   1  -1 1679.98  166.46
   1   1  -1 1641.47  162.74
  -1  -1   1 1529.82  151.70
  -1  -1   1 1492.60  148.23
  -1   1   1 1694.09  167.61
  -1   1   1 1601.69  158.50
   1  -1  -1 1505.43  148.87
   1  -1  -1 1628.64  161.07
   0   1   1  138.61   14.25
   0   1   1  144.90   14.84
   0  -1  -1  134.24   13.82
   0  -1  -1  142.59   14.62
   0   1  -1  165.17   17.01
   0   1  -1  149.52   15.59
   0  -1   1  138.86   14.57
   0  -1   1  127.52   13.50
   1   1   1  307.63   32.24
   1   1   1  310.58   33.39
  -1  -1  -1  312.51   34.00
  -1   1  -1  301.98   31.38
  -1   1  -1  296.59   31.60
   1  -1   1  295.44   30.75
   1  -1   1  326.50   34.32
   2   1   1  670.96   67.61
   2   1   1  644.53   64.88
  -2  -1  -1  634.26   64.03
  -2  -1  -1  646.19   65.31
  -2   1  -1  637.08   64.45
  -2   1  -1  775.95   78.38
   2  -1   1  680.59   68.29
   2  -1   1  627.58   63.19
   3   1   1  23.935  11.463
   3   1   1  14.079   7.743
  -3  -1  -1  4.1300  9.4690
  -3  -1  -1  16.633   8.533
  -3   1  -1  2.6977  7.6940
  -3   1  -1  19.200  10.325
   3  -1   1  16.043   7.279
   3   2  -1  0.8859  7.3680
  -3  -2   1  6.2502  6.7533
  -3  -2   1  4.8436  6.6121
  -3   2   1  2.7927  7.6825
   3  -2  -1  -1.291   5.202
   3  -2  -1  5.3723  5.2517
   2   2  -1  24.051   6.687
   2   2  -1  16.941   5.947
  -2  -2   1  15.991  10.449
  -2  -2   1  17.878   8.979
  -2   2   1  20.201   3.972
  -2   2   1  22.588   5.331
   2  -2  -1  25.411   5.055
   2  -2  -1  26.977   4.539
   1   2  -1  994.38   99.18
   1   2  -1  913.01   91.51
  -1  -2   1  933.68   93.29
  -1  -2   1  980.52   97.90
  -1   2   1  937.14   92.92
  -1   2   1  899.15   89.12
   1  -2  -1 1102.70  109.31
   0   2   1  810.60   80.57
   0   2   1  929.70   92.20
   0  -2  -1  809.31   80.30
   0  -2  -1  835.75   82.92
   0   2  -1  876.05   86.99
   0   2  -1  984.76   97.69
   0  -2   1  625.92   62.46
   0  -2   1  776.97   77.26
   1   2   1 5804.84  573.55
   1   2   1 6070.50  599.86
  -1  -2  -1 5104.10  504.63
  -1   2  -1 5763.77  569.45
  -1   2  -1 6115.42  604.10
   1  -2   1 5895.96  582.41
   2   2   1  24.243   7.948
   2   2   1  22.293  10.535
  -2  -2  -1  36.680  10.419
  -2  -2  -1  32.047   8.214
  -2   2  -1  33.291   6.889
  -2   2  -1  33.933   9.932
   2  -2   1  31.982   6.654
   2  -2   1  20.355   7.754
   3   2   1  14.336  12.040
   3   2   1  13.014   9.193
  -3  -2  -1  -5.460   8.023
  -3  -2  -1  -0.649  11.172
  -3   2  -1 -0.1819  5.3903
  -3   2  -1  3.9670  7.2012
   3  -2   1  9.3149  8.2574
   3  -2   1  4.3661  9.3162
   3   3  -1  19.880   8.236
   3   3  -1  14.079   8.355
  -3  -3   1  35.294  10.553
  -3   3   1  15.016   8.771
   2   3  -1  89.184  11.878
   2   3  -1  87.194  11.739
  -2  -3   1  88.901  12.586
  -2  -3   1  92.213  12.608
  -2   3   1  81.406   9.260
  -2   3   1  93.380  10.303
   2  -3  -1  114.22   12.18
   2  -3  -1  117.14   12.96
   1   3  -1 1221.16  121.85
   1   3  -1 1244.52  124.28
  -1  -3   1 1166.23  116.31
  -1  -3   1 1146.98  114.44
  -1   3   1 1141.33  113.03
  -1   3   1 1153.52  114.26
   1  -3  -1 1170.08  115.88
   1  -3  -1 1268.90  125.62
   0   3   1  2.0496  6.5479
   0   3   1  -1.598   6.534
   0  -3  -1  6.1424  6.5235
   0  -3  -1 -0.0592  6.2733
   0   3  -1  1.0027  7.5798
   0   3  -1  -2.422   7.676
   0  -3   1  5.7240  7.8198
   0  -3   1  -1.899   7.025
   1   3   1  48.166  10.896
   1   3   1  57.651  11.398
  -1  -3  -1  37.180  10.289
  -1  -3  -1  62.784  11.834
  -1   3  -1  46.254   8.944
  -1   3  -1  45.510   8.370
   1  -3   1  44.829   8.831
   1  -3   1  51.002   8.635
   2   3   1  280.55   29.92
   2   3   1  270.80   28.86
  -2  -3  -1  326.63   36.27
  -2  -3  -1  276.96   29.75
  -2   3  -1  366.28   37.63
  -2   3  -1  404.40   41.18
   2  -3   1  343.70   35.34
   2  -3   1  374.37   38.63
   3   3   1  29.878  14.259
  -3  -3  -1  50.925  11.601
  -3  -3  -1  56.162  15.722
  -3   3  -1  23.307   8.673
  -3   3  -1  47.704   8.065
   3  -3   1  24.462   9.475
   3  -3   1  52.389   8.918
   3   4  -1  12.647  10.094
  -3  -4   1   3.878  12.633
  -3  -4   1  15.966   9.066
   2   4  -1  23.589   7.856
   2   4  -1  14.618   9.460
  -2  -4   1  29.236   9.126
  -2   4   1  41.082   6.837
  -2   4   1  29.326   4.804
   2  -4  -1  39.529   5.576
   2  -4  -1  33.664   4.960
   1   4  -1  922.64   92.35
   1   4  -1  896.59   89.92
  -1  -4   1  931.24   93.32
  -1  -4   1  985.01   98.69
  -1   4   1  971.54   96.35
  -1   4   1  958.57   95.07
   1  -4  -1  895.43   88.89
   1  -4  -1 1007.73   99.95
   0   4   1  895.05   89.31
   0   4   1  822.53   82.23
   0  -4  -1  770.68   77.18
   0  -4  -1  955.75   95.56
   0   4  -1  888.12   88.82
   0   4  -1  791.09   79.37
   0  -4   1  689.83   69.57
   0  -4   1  752.46   75.62
   1   4   1  88.439  13.784
   1   4   1  70.151  12.381
  -1  -4  -1  87.413  13.784
  -1  -4  -1  74.437  13.052
  -1   4  -1  75.246  10.596
  -1   4  -1  65.287   9.925
   1  -4   1  69.715  10.052
   1  -4   1  55.366   9.247
   2   4   1  137.71   18.38
   2   4   1  149.00   18.15
  -2  -4  -1  137.97   19.24
  -2  -4  -1  130.78   19.05
  -2   4  -1  176.34   19.10
  -2   4  -1  177.75   19.70
   2  -4   1  157.47   17.16
   3   4   1  60.923  12.082
   3   4   1  37.321  10.895
  -3  -4  -1  70.266  13.617
  -3  -4  -1  63.760  13.065
  -3   4  -1  35.974   7.477
  -3   4  -1  42.185  12.950
   3  -4   1  73.064  15.709
   3  -4   1  53.159   9.060
   3   5  -1  71.871  17.531
  -3  -5   1  65.454  13.104
  -3  -5   1  79.494  14.387
   2   5  -1  150.16   19.58
   2   5  -1  118.27   14.96
  -2  -5   1  140.79   17.67
  -2  -5   1  144.77   20.44
  -2   5   1  131.55   14.01
  -2   5   1  148.10   15.71
   2  -5  -1  143.61   15.17
   2  -5  -1  148.23   15.94
   1   5  -1  939.32   94.21
   1   5  -1 1027.88  102.84
  -1  -5   1  983.60   98.75
  -1  -5   1  980.78   98.41
  -1   5   1  970.25   96.51
  -1   5   1  996.43   98.95
   1  -5  -1 1125.42  111.75
   1  -5  -1  993.23   98.64
   0   5   1 3838.66  379.76
   0   5   1 3105.84  307.38
   0  -5  -1 2571.94  254.76
   0  -5  -1 3392.04  335.74
   0   5  -1 2610.44  258.73
   0   5  -1 3517.81  348.19
   0  -5   1 3081.45  305.19
   0  -5   1 3273.96  324.19
   1   5   1  159.14   19.66
   1   5   1  140.53   17.70
  -1  -5  -1  131.93   17.49
  -1  -5  -1  119.50   16.74
  -1   5  -1  181.73   21.18
  -1   5  -1  145.02   17.12
   1  -5   1  151.18   17.44
   1  -5   1  154.52   17.66
   2   5   1  63.657  11.669
   2   5   1  94.420  17.993
  -2  -5  -1  62.078  11.708
  -2  -5  -1  67.353  12.224
  -2   5  -1  96.948  12.389
  -2   5  -1  91.006  11.737
   2  -5   1  83.011  11.540
   2  -5   1  60.885  11.658
   3   5   1  19.739   9.864
  -3  -5  -1  22.306  11.679
  -3  -5  -1  16.479  11.252
  -3   5  -1  20.342  12.077
   3  -5   1  -8.838  11.457
   3  -5   1  13.450   7.059
   3   6  -1  115.70   16.13
  -3  -6   1  148.87   20.10
  -3  -6   1  153.11   20.61
   2   6  -1  517.60   53.29
   2   6  -1  468.31   48.11
  -2  -6   1  502.58   52.70
  -2  -6   1  509.00   52.74
  -2   6   1  578.82   57.89
  -2   6   1  500.27   50.12
   2  -6  -1  487.82   48.94
   2  -6  -1  472.55   47.34
   1   6  -1  169.41   20.56
   1   6  -1  167.36   22.29
  -1  -6   1  122.32   17.31
  -1  -6   1  144.77   18.94
  -1   6   1  164.02   18.33
  -1   6   1  122.40   14.58
   1  -6  -1  119.54   13.63
   1  -6  -1  134.76   15.03
   0   6   1  305.58   32.88
   0  -6  -1  284.02   30.97
   0  -6  -1  293.90   31.56
   0   6  -1  315.97   34.01
   0   6  -1  256.30   28.38
   0  -6   1  303.40   32.91
   0  -6   1  347.93   37.04
   1   6   1  436.36   45.74
   1   6   1  386.18   40.71
  -1  -6  -1  428.53   45.02
  -1  -6  -1  429.04   44.93
  -1   6  -1  451.63   46.16
  -1   6  -1  392.59   41.17
   1  -6   1  421.47   43.62
   1  -6   1  430.58   44.16
   2   6   1  29.480   9.998
   2   6   1  29.159   9.619
  -2  -6  -1  33.702  11.395
  -2  -6  -1  31.636  10.810
  -2   6  -1  15.067  10.331
  -2   6  -1  14.926  10.100
   2  -6   1  21.510   7.653
   2  -6   1  15.324   6.520
   3   6   1  64.799  13.732
   3   6   1  51.965  11.800
  -3  -6  -1  70.497  14.413
  -3  -6  -1  80.688  15.760
  -3   6  -1  70.343  12.294
   3  -6   1  59.537  15.632
   3  -6   1  65.338  12.040
   3   7  -1  356.40   38.27
  -3  -7   1  372.83   42.42
  -3  -7   1  524.78   55.58
   2   7  -1  34.780  10.352
   2   7  -1  29.929  15.555
  -2  -7   1  45.343  11.746
  -2  -7   1  45.471  15.427
  -2   7   1  33.677   6.377
  -2   7   1  47.139   7.865
   2  -7  -1  36.859   6.548
   2  -7  -1  34.857   5.564
   1   7  -1  73.873  16.030
   1   7  -1  86.450  15.812
  -1  -7   1  74.091  17.608
  -1  -7   1  74.989  14.169
  -1   7   1  49.783   8.270
  -1   7   1  56.380   9.822
   1  -7  -1  40.209   7.567
   0   7   1  268.62   29.92
   0   7   1  337.79   35.78
   0  -7  -1  398.24   41.72
   0  -7  -1  248.08   27.44
   0   7  -1  384.76   40.48
   0   7  -1  342.93   36.53
   0  -7   1  288.51   31.66
   1   7   1  17.544  10.193
   1   7   1  14.515   9.747
  -1  -7  -1  31.546  11.036
  -1  -7  -1  26.823  10.962
  -1   7  -1  22.973   8.685
  -1   7  -1  22.755   8.993
   1  -7   1  6.1347  8.0675
   1  -7   1  19.290   9.164
  -2  -7  -1  174.54   22.97
  -2  -7  -1  158.63   20.11
  -2   7  -1  151.83   17.94
  -2   7  -1  166.07   18.92
   2  -7   1  128.60   16.11
   2  -7   1  161.20   18.46
   3   7   1  22.023  10.697
   3   7   1  37.398  17.069
  -3  -7  -1  28.042  13.001
  -3  -7  -1  11.738  12.775
  -3   7  -1  13.951  10.692
   3  -7   1  22.370  10.790
   3  -7   1  11.774  14.169
   3   8  -1  13.861  12.757
   3   8  -1   7.830  10.432
  -3  -8   1  -0.885  13.142
  -3  -8   1  32.675  13.155
   2   8  -1  12.590   9.658
   2   8  -1  17.891  10.482
  -2  -8   1  17.172  11.624
  -2  -8   1  32.265  11.366
  -2   8   1  17.095   6.018
  -2   8   1  18.815   7.190
   2  -8  -1  13.681   4.882
   2  -8  -1  13.014   7.051
   1   8  -1  -6.948  13.424
   1   8  -1   2.612  10.235
  -1  -8   1  21.189  11.520
  -1  -8   1  19.264  15.529
  -1   8   1  6.3156  6.6506
  -1   8   1  11.801   6.467
   1  -8  -1  18.019   7.407
   1  -8  -1  11.131   9.329
   0   8   1 4871.80  481.66
   0   8   1 4432.88  438.41
   0  -8  -1 4464.96  441.49
   0  -8  -1 4634.37  458.43
   0   8  -1 4239.08  419.42
   0   8  -1 3868.18  382.84
   0  -8   1 4389.24  434.30
   0  -8   1 4772.98  472.16
   1   8   1 2321.68  230.50
   1   8   1 2240.82  222.67
  -1  -8  -1 3082.74  306.35
  -1  -8  -1 2242.11  222.93
  -1   8  -1 2369.16  234.99
  -1   8  -1 2257.51  223.95
   1  -8   1 2245.96  222.93
   1  -8   1 2289.59  227.29
   2   8   1  118.73   16.79
   2   8   1  105.34   16.02
  -2  -8  -1  122.54   17.57
  -2  -8  -1  131.93   18.55
  -2   8  -1  118.45   15.59
  -2   8  -1  124.75   15.32
   2  -8   1  114.03   14.71
   2  -8   1  114.04   14.91
   3   8   1  -5.009  10.638
   3   8   1  -4.438  12.337
  -3  -8  -1  -6.825  13.501
  -3  -8  -1  10.049  12.514
  -3   8  -1  2.9043  7.7672
   3  -8   1  12.086  10.412
   3   9  -1  16.222  12.503
  -3  -9   1  24.321  16.338
  -3  -9   1  25.963  13.630
   2   9  -1  39.246  14.053
   2   9  -1  29.108  11.213
  -2  -9   1  24.770  11.712
  -2  -9   1  47.255  13.707
  -2   9   1  25.578   7.645
  -2   9   1  16.299   5.472
   2  -9  -1  10.076   7.561
   2  -9  -1  20.393   5.629
   1   9  -1   7.458  10.353
   1   9  -1  15.516  12.545
  -1  -9   1   2.048  11.141
  -1   9   1  7.6606  7.0959
  -1   9   1  -2.297   7.477
   1  -9  -1  3.3625  7.4591
   1  -9  -1  -4.246   7.573
   0   9   1 1093.08  109.47
   0   9   1 1223.34  122.58
   0  -9  -1 1049.31  105.53
   0  -9  -1 1032.76  103.72
   0   9  -1 1091.02  109.31
   0   9  -1 1031.73  103.60
   0  -9   1  870.79   87.91
   0  -9   1 1265.44  126.77
   1   9   1  284.66   31.28
   1   9   1  282.09   31.30
  -1  -9  -1  340.49   36.86
  -1  -9  -1  422.75   44.75
  -1   9  -1  266.18   29.12
  -1   9  -1  268.10   29.35
   1  -9   1  245.77   27.41
   1  -9   1  258.48   28.53
   2   9   1  10.559  10.790
   2   9   1   4.777  12.366
  -2  -9  -1  -2.198  10.947
  -2  -9  -1  13.065  12.060
  -2   9  -1  -2.005  10.655
  -2   9  -1  6.3246  7.2358
   2  -9   1  12.634   8.008
   2  -9   1  8.7823  9.4382
   3   9   1  16.723  11.880
   3   9   1   1.248  11.702
  -3  -9  -1  17.082  14.066
  -3  -9  -1   9.416  17.275
  -3   9  -1   9.695  14.810
   3  -9   1  -4.511   7.689
   3  10  -1  17.493  19.662
   3  10  -1  13.861  11.669
  -3 -10   1   6.533  14.733
   2  10  -1  103.03   16.49
   2  10  -1  96.409  15.735
  -2 -10   1  151.44   21.59
  -2 -10   1  122.03   18.64
  -2  10   1  74.322  11.039
  -2  10   1  91.404  12.069
   2 -10  -1  86.373  11.506
   2 -10  -1  87.348  11.312
   1  10  -1  523.89   54.36
   1  10  -1  523.37   54.45
  -1 -10   1  464.98   48.91
  -1 -10   1  558.28   57.92
  -1  10   1  352.04   36.46
  -1  10   1  389.13   40.11
   1 -10  -1  414.67   42.70
   1 -10  -1  407.74   41.97
   0  10   1  336.25   37.10
   0  10   1  426.22   44.44
   0 -10  -1  368.21   39.02
   0 -10  -1  331.25   37.24
   0  10  -1  290.56   31.71
   0  10  -1  339.72   36.56
   0 -10   1  414.28   43.88
   0 -10   1  349.21   37.91
   1  10   1  771.84   78.57
   1  10   1  793.14   80.44
  -1 -10  -1  915.58   92.64
  -1 -10  -1  930.34   94.18
  -1  10  -1  680.72   69.73
  -1  10  -1  621.94   63.30
   1 -10   1  804.95   81.70
   1 -10   1  685.08   69.48
   2  10   1  67.995  13.476
   2  10   1  37.719  15.041
  -2 -10  -1  37.540  13.232
  -2 -10  -1  64.542  14.323
  -2  10  -1  33.368  10.779
   2 -10   1  26.849  11.769
   2 -10   1  36.539  11.674
   3  10   1  16.261  14.220
   3  10   1  34.806  17.826
  -3 -10  -1  17.377  20.842
  -3 -10  -1  11.923  13.566
  -3  10  -1  12.834  13.258
  -3  10  -1   5.119  12.712
   3 -10   1  -5.553   8.763
   3  11  -1   6.905  12.924
   3  11  -1   3.655  16.697
  -3 -11   1   4.054  14.605
  -3 -11   1  -18.53   16.84
   2  11  -1   2.222  11.177
   2  11  -1  19.841  12.081
  -2 -11   1   1.935  14.284
  -2  11   1  -1.738   5.905
  -2  11   1  9.7808  9.5832
   2 -11  -1  9.5254  8.0649
   2 -11  -1  1.6107  7.1460
   1  11  -1  344.72   37.33
   1  11  -1  352.04   37.77
  -1 -11   1  385.92   41.67
  -1  11   1  243.33   26.35
   1 -11  -1  287.35   30.92
   1 -11  -1  333.94   35.32
   0  11   1  498.99   51.37
   0  11   1  607.82   62.00
   0 -11  -1  597.04   61.36
   0  11  -1  454.20   47.97
   0  11  -1  440.72   45.98
   0 -11   1  684.70   70.66
   0 -11   1  492.19   51.31
   1  11   1  73.603  13.437
   1  11   1  74.540  14.259
  -1 -11  -1  101.43   16.90
  -1 -11  -1  91.802  16.094
  -1  11  -1  57.702  11.610
  -1  11  -1  68.855  11.993
   1 -11   1  46.280  11.300
   1 -11   1  60.474  11.312
   2  11   1  175.18   22.41
   2  11   1  232.68   30.44
  -2 -11  -1  220.75   27.45
  -2 -11  -1  192.25   29.42
  -2  11  -1  153.37   18.60
  -2  11  -1  138.61   20.53
   2 -11   1  135.01   17.58
   2 -11   1  132.45   17.70
   3  11   1  -4.049  14.477
   3  11   1   2.972  16.248
  -3 -11  -1  19.046  17.352
  -3 -11  -1  19.726  15.991
  -3  11  -1  12.676  10.772
  -3  11  -1   3.817  10.838
   3 -11   1  -22.52   17.34
   2  12  -1  12.553  12.099
   2  12  -1   7.879  12.810
  -2 -12   1  17.031  15.247
  -2 -12   1  -4.903  14.284
  -2  12   1  5.0528  8.0277
   2 -12  -1   3.898  10.240
   1  12  -1  28.646  11.576
   1  12  -1   3.477  14.810
  -1 -12   1  40.697  13.181
  -1 -12   1  25.001  16.928
  -1  12   1  7.2962  7.3513
   1 -12  -1  20.188   8.958
   0  12   1  38.284  10.805
   0  12   1  37.540   9.714
   0 -12  -1  29.249  11.657
   0 -12  -1  29.672  11.389
   0  12  -1  29.018  10.473
   0  12  -1  24.937   9.975
   0 -12   1  11.793  11.318
   0 -12   1  19.546  11.398
   1  12   1  254.63   28.49
   1  12   1  286.97   31.89
  -1 -12  -1  261.30   30.48
  -1 -12  -1  199.31   24.53
  -1  12  -1  236.53   26.69
  -1  12  -1  232.30   26.25
   1 -12   1  177.62   21.38
   1 -12   1  285.81   31.42
   2  12   1  69.599  15.093
   2  12   1  44.149  13.412
  -2 -12  -1  85.539  18.057
  -2 -12  -1  88.465  22.408
  -2  12  -1  45.201  12.572
  -2  12  -1  43.225  14.169
   2 -12   1  49.501  15.093
   2 -12   1  33.741  11.108
   2  13  -1  45.253  14.502
   2  13  -1  17.031  13.001
  -2 -13   1  26.297  15.735
  -2 -13   1  37.681  15.529
  -2  13   1  15.901   9.833
   2 -13  -1  14.361   9.751
   2 -13  -1  33.484  14.040
   1  13  -1  45.561  12.825
   1  13  -1  43.495  11.679
  -1 -13   1  26.926  13.809
  -1 -13   1  40.838  14.117
  -1  13   1  26.489   9.647
  -1  13   1  21.677   8.463
   1 -13  -1  26.181  10.217
   1 -13  -1  20.034  10.023
   0  13   1  53.980  10.817
   0  13   1  52.607  11.773
   0 -13  -1  49.847  13.104
   0 -13  -1  60.577  13.476
   0  13  -1  56.970  11.845
   0  13  -1  47.332  11.490
   0 -13   1  76.748  14.759
   0 -13   1  66.583  13.938
   1  13   1  58.190  13.283
   1  13   1  41.659  11.169
  -1 -13  -1  57.176  14.233
  -1 -13  -1  34.023  14.182
  -1  13  -1  31.354  10.969
  -1  13  -1   9.116  14.695
   1 -13   1  22.909  15.529
   1 -13   1  37.745  12.873
   2  13   1  31.585  12.787
   2  13   1  30.635  13.694
  -2 -13  -1  31.597  15.144
  -2 -13  -1  43.251  16.517
  -2  13  -1  13.848  11.638
  -2  13  -1   2.704  10.752
   2 -13   1  26.515  12.326
   2 -13   1   6.948  11.008
   2  14  -1  16.569  13.245
   2  14  -1  11.127  19.687
  -2 -14   1  15.452  20.714
  -2 -14   1  23.756  16.890
  -2  14   1  27.734  13.681
   2 -14  -1   5.003  12.097
   2 -14  -1   9.810  19.816
   1  14  -1  90.570  22.087
   1  14  -1  82.087  14.733
  -1 -14   1  89.402  23.191
  -1 -14   1  69.586  16.671
  -1  14   1  75.785  13.630
  -1  14   1  55.225  11.139
   1 -14  -1  45.728  12.173
   1 -14  -1  63.991  13.386
   0  14   1  56.739  12.860
   0  14   1  62.989  14.849
   0 -14  -1  68.752  15.054
   0 -14  -1  51.015  18.173
   0  14  -1  45.561  11.614
   0  14  -1  30.083  11.714
   0 -14   1  35.537  13.116
   1  14   1  24.308  13.540
   1  14   1  37.180  13.347
  -1 -14  -1  22.909  15.298
  -1 -14  -1   2.403  13.245
  -1  14  -1  20.932  11.402
  -1  14  -1  29.903  12.430
   1 -14   1  18.289  11.733
   1 -14   1  12.499  12.626
   2  14   1  45.047  14.977
   2  14   1  48.333  15.375
  -2 -14  -1  11.819  15.568
  -2 -14  -1  33.446  17.724
  -2  14  -1  34.472  13.296
  -2  14  -1  13.835  11.611
   2 -14   1  36.693  16.428
   2 -14   1  25.168  12.636
   2  15  -1  265.79   31.85
   2  15  -1  298.39   35.20
  -2  15   1  219.85   26.05
   2 -15  -1  273.37   31.02
   2 -15  -1  207.14   26.53
   1  15  -1  324.32   35.87
   1  15  -1  267.08   30.55
  -1 -15   1  295.57   34.36
  -1 -15   1  354.22   40.68
  -1  15   1  286.46   32.53
  -1  15   1  261.04   29.75
   1 -15  -1  333.17   36.55
   1 -15  -1  271.44   30.88
   0  15   1  15.029  11.774
   0  15   1  29.557  11.529
   0 -15  -1  48.217  14.310
   0 -15  -1  41.505  14.451
   0  15  -1  34.703  15.889
   0  15  -1  23.127  13.129
   0 -15   1  27.914  18.340
   0 -15   1  38.053  15.696
   1  15   1  -0.219  13.463
   1  15   1  -12.34   12.70
  -1 -15  -1  20.688  14.605
  -1 -15  -1   9.966  15.940
  -1  15  -1   9.171  11.798
  -1  15  -1  10.270  11.987
   1 -15   1   8.029  12.847
   1 -15   1  -5.928  13.116
   2  15   1  160.30   35.04
   2  15   1  100.93   19.28
  -2 -15  -1  132.70   27.21
  -2  15  -1  62.181  18.160
  -2  15  -1  52.581  15.375
   2 -15   1  68.085  19.675
   2 -15   1  64.234  20.368
   2  16  -1  81.817  18.609
   2  16  -1  91.058  19.970
  -2 -16   1  109.46   21.74
  -2 -16   1  125.45   24.18
  -2  16   1  46.677  22.498
   2 -16  -1  74.643  20.714
   2 -16  -1  56.175  17.339
   1  16  -1  26.271  13.027
   1  16  -1   0.449  13.232
  -1 -16   1  -8.838  15.670
  -1 -16   1  18.545  16.132
  -1  16   1   3.083  11.770
  -1  16   1   9.496  12.065
   1 -16  -1   9.991  22.524
   1 -16  -1   5.601  12.144
   0  16   1  49.385  13.540
   0  16   1  20.676  12.554
   0 -16  -1  10.279  14.605
   0 -16  -1  23.153  15.157
   0  16  -1  27.041  13.951
   0  16  -1  18.969  12.975
   0 -16   1  19.867  15.747
   0 -16   1  21.792  15.850
   1  16   1  -7.455  18.648
   1  16   1   3.599  16.081
  -1 -16  -1   8.029  20.740
  -1 -16  -1  11.856  23.538
  -1  16  -1  -9.461  11.791
  -1  16  -1  11.125  12.937
   1 -16   1  18.879  14.374
   1 -16   1  -5.379  13.232
   2  16   1  35.448  21.779
   2  16   1  21.356  19.328
  -2 -16  -1  -6.841  24.898
  -2 -16  -1   8.818  19.854
  -2  16  -1  16.428  14.810
  -2  16  -1  15.221  16.017
   2 -16   1  25.476  15.131
   2 -16   1   2.857  24.436
   1  17  -1  182.24   25.30
  -1 -17   1  133.99   23.59
  -1 -17   1  202.91   28.85
  -1  17   1  127.07   24.20
  -1  17   1  115.35   19.26
   1 -17  -1  144.13   25.35
   1 -17  -1  123.25   18.79
   0  17   1  -0.604  12.052
   0  17   1   2.481  13.001
   0 -17  -1   5.727  14.964
   0 -17  -1   0.226  14.592
   0  17  -1  -8.197  13.399
   0  17  -1  26.656  17.044
   0 -17   1  19.367  21.086
   0 -17   1   1.579  15.901
   1  17   1   7.217  14.477
   1  17   1   4.030  15.683
  -1 -17  -1  21.741  18.545
  -1 -17  -1  10.088  17.942
  -1  17  -1  -1.097  13.219
  -1  17  -1  -24.86   14.10
   1 -17   1  11.140  13.938
   1 -17   1   0.341  14.117
   1  18  -1  16.736  21.394
   1  18  -1   8.735  16.479
  -1 -18   1  -22.43   26.44
  -1 -18   1  17.839  19.918
  -1  18   1  10.967  14.066
  -1  18   1  12.083  13.848
   1 -18  -1  -5.632  14.836
   1 -18  -1   6.326  15.581
   0  18   1   3.431  12.146
   0  18   1  41.326  20.124
   0 -18  -1  -1.552  20.817
   0 -18  -1  -6.513  15.427
   0  18  -1  25.296  14.862
   0  18  -1   1.523  19.123
   0 -18   1   5.081  17.198
   0 -18   1  -1.353  15.080
   1  18   1  18.289  23.794
   1  18   1  -11.27   15.98
  -1 -18  -1   1.182  17.198
  -1 -18  -1  -3.491  28.889
  -1  18  -1   4.134  14.169
  -1  18  -1  -8.812  15.414
   1 -18   1  16.825  16.607
   1 -18   1  13.514  16.517
   0  19   1  25.514  17.724
   0  19   1  18.494  19.533
   0 -19  -1   8.712  16.376
   0 -19  -1  27.914  25.848
   0  19  -1  25.424  17.352
   0  19  -1  22.768  14.297
   0 -19   1  55.931  18.276
   0 -19   1  10.831  17.210
  -3   0   2  22.087   5.684
   3   0  -2  17.185   8.205
   3   0  -2  16.428   5.905
  -2   0   2  54.134   7.707
  -2   0   2  56.791   8.071
  -1   0   2  23.935   4.547
  -1   0   2  22.601   5.792
   1   0  -2  20.791   5.090
   1   0  -2  22.318   4.657
  -2   0  -2 8376.78  827.54
  -2   0  -2 8188.12  808.93
   2   0   2 9082.65  896.97
   2   0   2 9119.87  900.56
  -3   0  -2  24.693   9.384
  -3   0  -2  16.068   7.270
   3   0   2  19.059   8.523
   3   0   2  16.158  11.054
   3   1  -2  19.059   9.210
   3   1  -2  30.712   9.002
  -3  -1   2  29.724   6.407
  -3  -1   2  35.075   7.321
  -3   1   2  25.257   6.219
   2   1  -2  13.976   5.583
   2   1  -2  7.8121  4.3713
  -2   1   2  9.0159  3.1392
  -2   1   2  9.6499  3.0340
   2  -1  -2  10.791   3.757
   2  -1  -2  14.631   3.863
   1   1  -2  840.50   83.91
   1   1  -2  849.36   84.70
  -1  -1   2  854.88   85.18
  -1  -1   2  816.89   81.39
  -1   1   2  736.16   73.19
  -1   1   2  839.86   83.47
   1  -1  -2  841.78   83.59
   1  -1  -2  836.14   83.04
   0   1   2  88.183  10.583
   0   1   2  83.691  10.243
   0  -1  -2  94.433  10.928
   0  -1  -2  104.46   11.74
   0   1  -2  104.14   12.42
   0   1  -2  95.318  13.437
   0  -1   2  89.286  11.542
   0  -1   2  125.80   17.06
   1   1   2  394.13   40.97
   1   1   2  301.86   32.14
  -1  -1  -2  334.20   35.29
  -1  -1  -2  267.08   28.80
  -1   1  -2  405.04   41.83
  -1   1  -2  301.60   31.83
   1  -1   2  406.58   42.43
   2   1   2  753.74   76.26
   2   1   2  789.29   79.49
  -2  -1  -2  760.29   76.56
  -2  -1  -2  717.68   72.90
  -2   1  -2  826.64   82.83
  -2   1  -2  900.82   90.38
   2  -1   2  898.77   89.97
   2  -1   2  898.51   89.88
   3   1   2  29.711   9.664
   3   1   2  18.802   8.631
  -3  -1  -2  32.791  11.812
  -3  -1  -2  27.401  10.138
  -3   1  -2  12.988  12.423
  -3   1  -2  31.739   7.856
   3  -1   2  33.279  12.332
   3  -1   2  37.116   9.131
   3   2  -2  122.19   14.98
   3   2  -2  97.115  14.361
  -3  -2   2  128.15   15.09
  -3  -2   2  112.22   13.49
   2   2  -2  10.497   5.072
  -2  -2   2  11.211   6.466
  -2  -2   2  3.7078  5.6611
  -2   2   2  9.2739  2.8748
  -2   2   2  11.100   2.687
   2  -2  -2  14.002   3.214
   1   2  -2  50.425  10.856
   1   2  -2  52.568   9.133
  -1  -2   2  56.329   9.637
   0   2   2 1196.77  118.69
   0   2   2 1109.25  110.10
   0  -2  -2 1122.34  111.34
   0  -2  -2 1078.96  107.06
   0   2  -2 1255.81  124.68
   0   2  -2 1212.05  120.58
   0  -2   2 1122.08  111.55
   0  -2   2 1139.66  113.29
   1   2   2 1569.60  156.32
   1   2   2 1646.61  163.76
  -1  -2  -2 1538.80  153.37
  -1  -2  -2 1561.90  155.29
  -1   2  -2 1742.86  173.26
  -1   2  -2 1676.13  166.46
   1  -2   2 1674.84  166.46
   1  -2   2 1667.14  165.43
   2   2   2  548.78   56.91
   2   2   2  451.76   46.47
  -2  -2  -2  495.27   51.70
  -2   2  -2  546.22   56.25
  -2   2  -2  526.45   53.51
   2  -2   2  519.01   52.85
   2  -2   2  522.73   52.94
   3   2   2  8.1265  8.6142
   3   2   2  3.0699  9.0955
  -3  -2  -2  18.725  10.245
  -3  -2  -2  -4.840   8.410
  -3   2  -2  15.452   9.220
  -3   2  -2  17.955   9.179
   3  -2   2  6.2386  8.1047
   3  -2   2  16.607   9.048
   3   3  -2  11.389   7.688
   3   3  -2  4.0029  8.0752
  -3  -3   2  1.3578  7.2795
   2   3  -2  205.47   22.15
   2   3  -2  200.98   21.69
  -2  -3   2  220.36   24.00
  -2  -3   2  218.95   23.72
   1   3  -2  309.04   32.32
   1   3  -2  316.49   33.12
  -1  -3   2  334.46   35.10
   1  -3  -2  225.75   22.65
   0   3   2 1173.54  116.53
   0   3   2 1137.22  113.18
   0  -3  -2 1137.22  113.08
   0  -3  -2 1186.64  117.85
   0   3  -2 1094.87  109.13
   0   3  -2 1119.77  111.53
   0  -3   2 1323.19  131.55
   0  -3   2 1407.89  139.89
   1   3   2 1735.16  172.49
   1   3   2 1774.95  176.47
  -1  -3  -2 1509.28  150.29
  -1  -3  -2 1514.42  150.80
  -1   3  -2 1904.57  189.17
   1  -3   2 1836.55  182.37
   1  -3   2 1810.88  179.80
   2   3   2  944.20   94.78
   2   3   2  938.94   94.23
  -2  -3  -2  938.81   94.66
  -2  -3  -2  937.01   94.36
  -2   3  -2  986.94   98.62
  -2   3  -2 1086.79  108.46
   2  -3   2 1096.03  109.27
   2  -3   2 1112.07  110.86
   3   3   2  -0.781  10.030
   3   3   2  20.624  14.836
  -3  -3  -2   8.047  12.068
  -3  -3  -2   6.547  10.517
  -3   3  -2   1.301  13.360
  -3   3  -2  6.0307  6.9009
   3  -3   2  -4.357   9.143
   3  -3   2  -27.31   12.11
   3   4  -2  68.880  11.181
   3   4  -2  71.062  12.260
  -3  -4   2  88.170  12.898
  -3  -4   2  71.806  12.274
   2   4  -2  113.18   14.28
   2   4  -2  111.63   14.23
  -2  -4   2  109.71   14.69
  -2  -4   2  99.977  14.028
   1   4  -2  1.7082  8.3036
   1   4  -2  13.206  13.104
  -1  -4   2  12.677   9.270
  -1  -4   2  15.131   9.642
  -1   4   2  6.0217  4.2019
  -1   4   2  7.3732  2.9929
   1  -4  -2  6.1424  3.3458
   1  -4  -2  5.6893  3.2457
   0   4   2  779.15   78.15
   0   4   2  648.50   65.18
   0  -4  -2  681.74   68.53
   0  -4  -2  539.80   54.71
   0   4  -2  708.44   71.59
   0   4  -2  776.33   78.21
   0  -4   2  911.99   91.51
   1   4   2 1946.92  193.67
   1   4   2 1981.58  196.87
  -1  -4  -2 1904.57  189.56
  -1  -4  -2 1919.97  190.71
  -1   4  -2 2117.62  209.96
  -1   4  -2 2153.55  213.56
   1  -4   2 2025.21  200.98
   1  -4   2 2079.11  206.24
   2   4   2  23.024   9.936
   2   4   2  28.402   9.066
  -2  -4  -2  28.620   8.863
  -2  -4  -2  30.019  17.300
  -2   4  -2  4.0081  7.5336
  -2   4  -2  24.937  10.815
   2  -4   2  19.726   7.614
   2  -4   2  16.325   9.393
   3   4   2  41.544  11.513
   3   4   2  44.791  12.318
  -3  -4  -2  52.004  13.001
  -3  -4  -2  48.731  11.979
  -3   4  -2  39.503  11.788
  -3   4  -2  52.260   9.955
   3  -4   2  69.419  13.527
   3   5  -2  94.253  14.862
   3   5  -2  118.19   15.75
  -3  -5   2  120.13   17.01
  -3  -5   2  135.78   17.71
   2   5  -2  691.37   69.68
   2   5  -2  674.30   68.39
  -2  -5   2  802.00   80.98
  -2  -5   2  877.21   88.58
   1   5  -2 1352.71  135.01
   1   5  -2 1259.40  125.65
  -1  -5   2 1111.43  111.16
  -1  -5   2 1332.17  133.09
  -1   5   2 1060.86  105.19
  -1   5   2 1007.86   99.94
   1  -5  -2 1158.66  114.84
   1  -5  -2 1092.43  108.29
   0   5   2 1002.85  100.38
   0   5   2  897.48   90.07
   0  -5  -2  677.38   68.50
   0   5  -2  789.29   79.76
   0   5  -2  871.82   87.90
   0  -5   2  695.60   70.63
   0  -5   2  816.12   82.61
   1   5   2  156.58   19.24
   1   5   2  138.09   17.90
  -1  -5  -2  123.76   16.74
  -1  -5  -2  134.76   17.52
  -1   5  -2  153.62   19.78
  -1   5  -2  161.71   20.32
   1  -5   2  106.73   14.54
   1  -5   2  120.95   15.20
   2   5   2   9.428  13.065
   2   5   2  11.797   8.585
  -2  -5  -2  4.9373  9.8886
  -2  -5  -2  12.744   8.823
  -2   5  -2  14.939   9.919
  -2   5  -2  7.5811  7.5002
   2  -5   2   9.760  10.749
   2  -5   2  11.416   7.206
   3   5   2  21.805  11.230
  -3  -5  -2  24.667  18.404
  -3  -5  -2  21.484  12.411
  -3   5  -2  13.720   8.263
  -3   5  -2   8.261  14.849
   3  -5   2  15.131   8.986
   3  -5   2  21.471  12.695
   3   6  -2  5.1387  9.2906
   3   6  -2  16.928  11.374
  -3  -6   2  -0.979  11.100
   2   6  -2  78.583  12.924
  -2   6   2  43.007   4.718
  -2   6   2  46.806   5.200
   1   6  -2  952.67   95.74
   1   6  -2 1083.71  108.54
  -1  -6   2  960.88   96.78
  -1  -6   2 1101.29  110.37
  -1   6   2  842.68   83.83
  -1   6   2  893.51   88.81
   1  -6  -2  989.12   98.24
   1  -6  -2  856.03   85.15
   0   6   2 1691.53  168.38
   0   6   2 1735.16  172.36
   0  -6  -2 1731.31  172.23
   0  -6  -2 1701.79  169.02
   0   6  -2 2023.93  200.98
   0   6  -2 1732.60  172.23
   0  -6   2 1894.30  188.28
   0  -6   2 1755.70  174.67
   1   6   2  233.84   26.57
   1   6   2  212.28   24.49
  -1  -6  -2  222.29   25.58
  -1  -6  -2  215.74   25.08
  -1   6  -2  204.45   23.49
  -1   6  -2  227.55   25.13
   1  -6   2  196.23   22.34
   1  -6   2  182.50   21.14
   2   6   2  8.8978  9.8784
   2   6   2  11.349   9.844
  -2  -6  -2  19.238  10.525
  -2  -6  -2  11.330  10.179
  -2   6  -2  16.222   8.388
  -2   6  -2  15.529   7.643
   2  -6   2  14.759   7.605
   2  -6   2  9.1994  8.0149
   3   6   2  20.393  10.678
   3   6   2   2.515  10.949
  -3  -6  -2  24.629  12.847
  -3  -6  -2  21.305  12.313
  -3   6  -2  12.563  11.792
   3  -6   2  8.4024  8.7413
   3  -6   2  26.104  15.131
   3   7  -2  61.899  17.275
   3   7  -2  65.351  18.199
  -3  -7   2  67.866  14.656
  -3  -7   2  88.170  16.068
   2   7  -2  414.54   43.24
  -2  -7   2  488.59   51.82
  -2  -7   2  464.34   48.29
  -2   7   2  356.91   35.76
   2  -7  -2  353.45   35.46
   1   7  -2  3.6654  9.4728
   1   7  -2  -2.803  10.971
  -1  -7   2   8.021  10.990
  -1  -7   2  19.161  11.416
  -1   7   2  7.2615  5.2170
  -1   7   2  3.1764  4.8808
   1  -7  -2  13.450   5.436
   1  -7  -2  6.8572  5.8998
   0   7   2 2379.43  235.89
   0   7   2 1613.24  160.30
   0  -7  -2 1532.38  152.47
   0  -7  -2 1814.73  180.32
   0   7  -2 1860.94  185.07
   0   7  -2 1590.14  158.24
   0  -7   2 2093.23  208.17
   0  -7   2 1961.04  194.95
   1   7   2  8.5205  9.2957
   1   7   2  -3.515  17.300
  -1  -7  -2   0.998  10.022
  -1  -7  -2  19.290  16.402
  -1   7  -2   6.287  11.913
  -1   7  -2  1.2785  9.5703
   1  -7   2  2.9544  9.3765
   1  -7   2  9.3919  9.4882
   2   7   2  588.06   60.85
   2   7   2  661.34   69.12
  -2  -7  -2  565.98   59.11
  -2   7  -2  603.71   61.36
  -2   7  -2  583.05   59.43
   2  -7   2  484.48   50.37
   2  -7   2  599.48   60.95
   3   7   2  72.653  15.208
   3   7   2  53.325  12.280
  -3  -7  -2  61.963  14.387
  -3  -7  -2  77.954  18.366
  -3   7  -2  30.648  12.988
   3  -7   2  27.953  16.363
   3   8  -2  -29.69   14.23
   3   8  -2   1.570  10.029
  -3  -8   2   0.724  12.536
  -3  -8   2  -0.404  13.142
   2   8  -2  23.948  10.603
   2   8  -2  31.585  10.718
  -2  -8   2  29.377  11.796
  -2   8   2  22.395   5.295
  -2   8   2  20.522   4.832
   2  -8  -2  20.470   4.176
   1   8  -2  773.64   78.36
   1   8  -2  786.21   79.70
  -1  -8   2  778.13   79.69
  -1  -8   2  752.72   76.64
  -1   8   2  594.86   59.78
  -1   8   2  604.10   60.69
   1  -8  -2  719.09   72.08
   1  -8  -2  619.11   62.64
   0   8   2  473.45   48.60
   0   8   2  668.91   69.32
   0  -8  -2  451.76   47.25
   0  -8  -2  573.94   58.72
   0   8  -2  523.24   54.81
   0  -8   2  490.90   52.09
   0  -8   2  431.61   47.36
   1   8   2  16.453  10.647
   1   8   2   6.423  10.190
  -1  -8  -2   3.217  10.292
  -1  -8  -2  20.060  13.527
  -1   8  -2  9.1866  9.8078
  -1   8  -2  -0.638  13.476
   1  -8   2  9.6127  9.5421
   1  -8   2  13.424   9.382
   2   8   2  86.463  14.336
   2   8   2  69.355  13.014
  -2  -8  -2  95.216  15.362
  -2  -8  -2  107.73   16.72
  -2   8  -2  58.729  10.768
   2  -8   2  55.122  11.643
   2  -8   2  65.300  11.653
   3   8   2  74.527  13.758
   3   8   2  86.437  16.171
  -3  -8  -2  95.832  16.915
  -3  -8  -2  83.588  16.697
  -3   8  -2  38.874  16.402
   3  -8   2  43.212  14.631
   3  -8   2  70.959  21.741
   3   9  -2  19.071  11.748
   3   9  -2  32.470  14.079
  -3  -9   2  19.046  13.874
  -3  -9   2  11.385  13.989
   2   9  -2  61.231  13.168
   2   9  -2  53.159  13.014
  -2  -9   2  47.909  12.937
  -2  -9   2  24.821  12.412
  -2   9   2  37.565   6.416
  -2   9   2  40.222   7.634
   2  -9  -2  37.039   5.633
   1   9  -2  29.069  14.605
   1   9  -2  14.541  10.675
  -1  -9   2  27.452  12.010
  -1   9   2  21.202   6.806
  -1   9   2  20.868   8.313
   1  -9  -2   8.456  10.120
   1  -9  -2  15.183   7.104
   0   9   2 1925.11  191.23
   0   9   2 1749.28  174.03
   0  -9  -2 1644.04  163.76
   0  -9  -2 2062.43  204.96
   0   9  -2 2781.14  276.70
   0   9  -2 1798.05  178.91
   0  -9   2 1697.94  169.15
   0  -9   2 1875.05  187.12
   1   9   2  66.814  13.424
   1   9   2  63.939  12.668
  -1  -9  -2  72.076  13.617
  -1  -9  -2  65.492  13.771
  -1   9  -2  63.464  12.212
  -1   9  -2  54.647  14.464
   1  -9   2  40.594  10.955
   1  -9   2  46.446  11.345
   2   9   2  108.83   16.15
   2   9   2  117.85   17.18
  -2  -9  -2  115.16   17.35
  -2  -9  -2  88.324  16.068
  -2   9  -2  100.25   14.66
   2  -9   2  68.033  12.034
   2  -9   2  87.477  13.630
   3   9   2  25.540  16.043
   3   9   2  30.468  18.147
  -3  -9  -2   5.997  18.853
  -3  -9  -2  19.854  13.296
  -3   9  -2  18.520  11.481
   3  -9   2  19.315  11.605
   3  -9   2  18.751  16.363
   3  10  -2  11.298  11.913
   3  10  -2  11.220  15.093
  -3 -10   2  -0.990  14.567
  -3 -10   2  -0.984  18.045
   2  10  -2  -7.609  12.398
   2  10  -2   7.612  11.444
  -2 -10   2   8.383  13.386
  -2 -10   2  13.578  12.675
  -2  10   2  2.1176  4.8988
  -2  10   2  5.7882  4.6126
   2 -10  -2  2.5437  5.1644
   2 -10  -2  3.4280  4.3122
   1  10  -2  10.126  10.728
   1  10  -2  36.179  11.272
  -1 -10   2  29.056  12.636
  -1 -10   2  40.735  12.763
   1 -10  -2  40.273  10.405
   1 -10  -2  32.598  11.685
   0  10   2  58.600  11.062
   0  10   2  53.775  11.015
   0 -10  -2  55.738  11.932
   0 -10  -2  46.973  11.611
   0  10  -2  48.718  12.227
   0  10  -2  67.084  15.812
   0 -10   2  50.271  12.898
   0 -10   2  36.179  16.967
   1  10   2  58.947  12.396
   1  10   2  63.079  13.412
  -1 -10  -2  78.172  14.400
  -1 -10  -2  79.212  15.054
  -1  10  -2  41.954  11.352
   1 -10   2  63.490  12.640
   2  10   2  17.454  11.345
  -2 -10  -2  13.476  12.648
  -2 -10  -2  40.299  16.492
  -2  10  -2  20.072   9.122
  -2  10  -2  3.5050  9.4613
   2 -10   2  12.518   9.030
   2 -10   2  15.273   9.459
   3  10   2  -5.347  12.885
   3  10   2   3.957  14.040
  -3 -10  -2   3.601  16.286
  -3 -10  -2  -10.49   14.28
  -3  10  -2   6.907  15.337
   3 -10   2   3.334  13.604
   3 -10   2  -0.675  19.841
   3  11  -2  20.714  13.604
   3  11  -2  19.687  14.952
  -3 -11   2  16.184  23.063
  -3 -11   2  -1.621  13.976
   2  11  -2  70.010  14.194
  -2 -11   2  72.307  17.095
  -2 -11   2  37.681  17.441
  -2  11   2  23.576   6.998
  -2  11   2  28.697   8.134
   2 -11  -2  29.570   8.119
   2 -11  -2  28.697   6.820
   1  11  -2  17.749  10.266
   1  11  -2  24.744  11.203
  -1 -11   2  46.600  13.540
  -1 -11   2  26.836  12.761
  -1  11   2  15.516   7.150
  -1  11   2  16.787   7.064
   1 -11  -2  12.579   7.998
   1 -11  -2  12.647   8.619
   0  11   2  153.11   18.90
   0  11   2  170.44   20.01
   0 -11  -2  210.22   24.68
   0 -11  -2  174.93   20.80
   0  11  -2  185.20   22.20
   0  11  -2  121.01   16.80
   0 -11   2  160.04   20.91
   0 -11   2  179.68   22.29
   1  11   2  102.88   15.39
   1  11   2  150.80   19.67
  -1 -11  -2  145.92   20.14
  -1 -11  -2  138.35   19.15
  -1  11  -2  106.75   15.67
  -1  11  -2  119.10   16.31
   1 -11   2  115.60   16.61
   2  11   2  12.109  11.508
   2  11   2   1.271  12.681
  -2 -11  -2  21.022  13.630
  -2 -11  -2  28.594  14.374
  -2  11  -2   2.618  11.416
  -2  11  -2  -2.703  11.421
   2 -11   2  12.323  10.443
   2 -11   2   1.644  10.637
   3  11   2   8.069  15.439
  -3 -11  -2  33.086  16.967
  -3 -11  -2  16.736  18.366
  -3  11  -2   6.536  14.182
  -3  11  -2  -5.315  17.095
   3 -11   2   3.323  13.681
   3 -11   2   4.112  14.849
   2  12  -2  -1.570  11.942
   2  12  -2  15.606  12.023
  -2 -12   2  14.015  15.529
  -2 -12   2   4.039  14.759
  -2  12   2  4.2712  8.0495
   2 -12  -2  9.4382  9.3380
   2 -12  -2  -2.367  13.874
   1  12  -2  196.87   26.04
   1  12  -2  214.84   25.28
  -1 -12   2  218.18   27.95
  -1 -12   2  233.71   27.75
   1 -12  -2  139.51   17.40
   0  12   2  34.498  10.077
   0  12   2  39.080  10.367
   0 -12  -2  41.480  11.521
   0 -12  -2  31.495  11.244
   0  12  -2  21.715  10.532
   0  12  -2  28.620  11.000
   0 -12   2  41.133  12.283
   0 -12   2  33.125  12.428
   1  12   2  12.484  11.350
   1  12   2  18.571  10.565
  -1 -12  -2  16.004  12.439
  -1 -12  -2  29.236  12.683
  -1  12  -2  15.478  10.544
  -1  12  -2  10.892  10.190
   1 -12   2  12.471  10.524
   1 -12   2  18.173  14.939
   2  12   2   1.613  12.766
   2  12   2   0.782  11.674
  -2 -12  -2  -5.081  18.982
  -2 -12  -2  12.439  13.938
  -2  12  -2   3.715  10.926
  -2  12  -2  -2.558  12.192
   2 -12   2   8.134  11.503
   2 -12   2  -1.192  12.230
   2  13  -2  35.319  13.347
   2  13  -2  27.657  13.540
  -2 -13   2  48.975  16.787
  -2 -13   2  24.526  15.850
  -2  13   2  15.041   7.879
   2 -13  -2  26.849  14.900
   2 -13  -2  25.617   9.787
   1  13  -2  49.668  15.670
   1  13  -2  35.499  12.043
  -1 -13   2  30.738  13.566
  -1 -13   2  41.261  15.093
  -1  13   2  41.197   9.234
  -1  13   2  34.652   9.513
   1 -13  -2  34.280  11.139
   1 -13  -2  44.727  10.722
   0  13   2  178.14   21.20
   0  13   2  186.74   21.73
   0 -13  -2  163.12   20.55
   0 -13  -2  199.70   24.01
   0  13  -2  201.49   23.87
   0  13  -2  169.92   21.05
   0 -13   2  237.69   27.90
   0 -13   2  217.41   25.83
   1  13   2  36.153  11.714
   1  13   2  39.015  12.399
  -1 -13  -2  70.279  15.760
  -1 -13  -2  56.021  17.634
   1 -13   2  36.243  18.520
   1 -13   2  49.989  16.145
   2  13   2  28.492  13.104
   2  13   2  13.078  13.566
  -2 -13  -2   9.661  14.066
  -2 -13  -2  11.800  15.465
  -2  13  -2  10.761  16.466
  -2  13  -2  10.016  12.924
   2 -13   2  -10.39   18.81
   2 -13   2   8.087  11.127
   2  14  -2  530.30   55.60
   2  14  -2  426.22   46.07
  -2 -14   2  600.50   64.04
  -2 -14   2  554.94   58.99
   2 -14  -2  379.25   41.71
   1  14  -2 1547.79  154.78
   1  14  -2 1000.93  101.40
  -1 -14   2 1070.49  108.37
  -1  14   2 1268.90  126.99
  -1  14   2 1173.16  117.69
   1 -14  -2 1336.02  133.86
   1 -14  -2 1303.94  130.91
   0  14   2  13.989   9.294
   0  14   2  21.882  14.785
   0 -14  -2  36.962  13.181
   0 -14  -2  29.621  16.505
   0  14  -2  23.884  11.383
   0  14  -2  24.500  14.926
   0 -14   2  11.297  13.707
   0 -14   2  10.365  13.283
   1  14   2  151.70   20.42
   1  14   2  157.22   21.77
  -1 -14  -2  203.68   26.77
  -1 -14  -2  156.96   21.43
  -1  14  -2  132.83   19.52
  -1  14  -2  151.06   22.90
   1 -14   2  132.32   23.90
   1 -14   2  151.83   21.14
   2  14   2   0.907  14.541
   2  14   2  -1.815  18.122
  -2 -14  -2  -14.53   23.05
  -2 -14  -2  -1.225  15.966
  -2  14  -2   8.995  13.437
  -2  14  -2   0.594  12.033
   2 -14   2  13.797  13.155
   2 -14   2   3.071  19.816
   2  15  -2  -1.405  15.452
   2  15  -2  12.504  13.899
  -2 -15   2  -2.345  17.185
  -2 -15   2  15.516  16.530
  -2  15   2  11.167  14.220
   2 -15  -2   0.470  19.367
   2 -15  -2  -5.143  18.083
   1  15  -2  88.991  16.556
   1  15  -2  132.83   21.29
  -1 -15   2  77.120  22.652
  -1 -15   2  96.563  19.482
  -1  15   2  78.236  14.092
  -1  15   2  73.039  13.052
   1 -15  -2  113.03   16.98
   1 -15  -2  105.42   17.02
   0  15   2 1228.73  123.09
   0  15   2 1246.44  125.09
   0 -15  -2 1082.68  109.23
   0 -15  -2 1300.09  130.52
   0  15  -2 1233.74  123.85
   0  15  -2 1115.15  112.45
   0 -15   2 1540.08  154.14
   0 -15   2 1068.18  108.27
   1  15   2  40.248  13.963
   1  15   2  40.337  13.655
  -1 -15  -2  37.052  16.325
  -1 -15  -2  51.015  18.276
  -1  15  -2  17.467  13.732
  -1  15  -2  35.499  16.222
   1 -15   2  28.902  20.483
   1 -15   2  25.771  13.258
   2  15   2   7.834  17.159
   2  15   2  22.665  15.452
  -2 -15  -2  24.500  17.865
  -2 -15  -2   3.096  16.774
  -2  15  -2  -15.89   17.34
  -2  15  -2  21.625  14.631
   2 -15   2  16.376  16.787
   2 -15   2  13.527  17.826
   2  16  -2  177.49   25.48
  -2 -16   2  183.66   27.17
  -2 -16   2  182.12   31.80
  -2  16   2  114.57   21.18
   2 -16  -2  116.56   19.17
   1  16  -2  32.932  13.822
   1  16  -2  68.085  15.837
  -1 -16   2  39.311  16.543
  -1 -16   2  81.111  19.764
  -1  16   2  53.223  12.699
  -1  16   2  61.988  13.630
   1 -16  -2  68.880  15.183
   1 -16  -2  50.913  13.540
   0  16   2  -3.826  11.906
   0  16   2  19.521  12.335
   0 -16  -2  26.040  15.298
   0 -16  -2   7.501  14.117
   0  16  -2  20.522  17.082
   0  16  -2  20.817  12.702
   0 -16   2   9.614  15.273
   1  16   2  27.850  14.130
   1  16   2  22.742  14.913
  -1 -16  -2  26.464  16.389
  -1 -16  -2  13.039  15.362
  -1  16  -2  25.155  13.604
  -1  16  -2   3.171  12.988
   1 -16   2  17.249  13.643
   1 -16   2  12.988  19.841
   1  17  -2  -8.067  15.144
  -1 -17   2  17.249  25.360
  -1 -17   2  10.398  17.326
  -1  17   2  -0.819  15.670
  -1  17   2   6.830  12.348
   1 -17  -2  -1.003  19.046
   1 -17  -2  -0.544  12.043
   0  17   2  68.932  14.438
   0  17   2  140.66   20.26
   0 -17  -2  138.61   21.45
   0 -17  -2  129.37   21.81
   0  17  -2  126.48   19.55
   0  17  -2  99.913  18.173
   0 -17   2  121.50   20.97
   0 -17   2  137.58   22.56
   1  17   2  -2.540  15.812
   1  17   2  -5.908  15.901
  -1 -17  -2   2.797  16.543
  -1 -17  -2   3.492  22.241
  -1  17  -2   4.661  13.784
  -1  17  -2  15.054  13.360
   1 -17   2   0.334  14.323
   1 -17   2  -3.482  15.491
   1  18  -2  580.87   60.94
   1  18  -2  487.44   54.47
  -1 -18   2  567.78   60.54
  -1 -18   2  432.25   53.17
  -1  18   2  447.91   49.15
  -1  18   2  400.55   43.92
   1 -18  -2  394.65   43.35
   1 -18  -2  508.48   56.62
   0  18   2  97.680  20.676
   0  18   2  95.703  18.070
   0 -18  -2  72.422  24.102
   0 -18  -2  144.13   21.59
   0  18  -2  99.541  19.328
   0  18  -2  116.53   19.06
   0 -18   2  121.67   21.20
   0 -18   2  127.71   21.84
   1  18   2  -9.667  16.004
   1  18   2  26.258  24.269
  -1 -18  -2  22.511  21.484
  -1 -18  -2  -16.59   19.91
  -1  18  -2  -2.039  15.144
  -1  18  -2  -2.093  16.261
   1 -18   2   3.655  17.493
   1 -18   2  11.628  18.353
  -3   0   3  17.210   7.360
  -2   0   3  8.0829  4.7486
  -2   0   3  3.4280  3.7732
   2   0  -3  9.3265  2.8877
   2   0  -3  3.0545  2.9069
  -1   0   3  7.0215  4.6844
  -1   0   3  4.6639  3.7604
   1   0  -3  6.1501  3.3741
   0   0  -3  8.0341  7.3950
   0   0  -3  8.7297  7.6029
   0   0   3  7.8775  7.8865
   0   0   3  5.9999  7.0279
  -1   0  -3  147.33   18.06
  -1   0  -3  146.44   18.25
   1   0   3  141.69   17.69
   1   0   3  139.51   17.35
  -2   0  -3  93.085  12.988
   2   0   3  105.38   15.13
   2   0   3  103.66   13.63
  -3   0  -3  11.928  17.968
  -3   0  -3  13.142   8.684
   3   0   3  1.2988  9.0352
   3   0   3   6.955  11.906
   3   1  -3  397.98   41.13
   3   1  -3  334.20   34.59
  -3  -1   3  323.03   33.10
   2   1  -3  388.61   39.12
   2   1  -3  441.62   44.51
  -2  -1   3  468.57   47.25
  -2   1   3  400.81   40.06
  -2   1   3  437.13   43.56
   2  -1  -3  391.82   39.20
   1   1  -3  47.332   7.158
   1   1  -3  40.748   7.077
  -1  -1   3  51.349   8.047
  -1  -1   3  39.015   6.833
  -1   1   3  44.611   5.107
  -1   1   3  43.764   4.968
   1  -1  -3  40.671   4.459
   1  -1  -3  43.122   5.139
   0   1   3  130.65   15.09
   0   1   3  135.91   15.85
   0  -1  -3  130.91   15.30
   0  -1  -3  154.91   17.34
   0   1  -3  161.45   18.51
   0   1  -3  132.45   16.20
   0  -1   3  145.02   17.34
   0  -1   3  121.67   15.05
   1   1   3  762.09   76.76
   1   1   3  779.28   78.44
  -1  -1  -3  737.96   74.46
  -1  -1  -3  717.94   72.46
  -1   1  -3  734.11   73.96
  -1   1  -3  762.98   76.81
   1  -1   3  763.88   76.86
   1  -1   3  753.10   75.76
   2   1   3  719.99   72.83
   2   1   3  636.44   65.07
  -2  -1  -3  650.56   66.75
  -2  -1  -3  611.54   62.51
  -2   1  -3  637.72   64.48
   2  -1   3  712.03   71.68
   2  -1   3  688.29   69.33
   3   1   3  96.050  14.297
   3   1   3  99.605  14.772
  -3  -1  -3  101.26   16.66
  -3  -1  -3  85.642  20.907
  -3   1  -3  76.337  13.899
  -3   1  -3  75.387  12.115
   3  -1   3  94.048  16.787
   3  -1   3  87.682  13.989
   3   2  -3  18.019   7.753
   3   2  -3  21.369   7.078
  -3  -2   3  28.556   6.529
  -3  -2   3  15.439   6.771
   2   2  -3  21.561   6.097
   2   2  -3  33.060   7.528
  -2  -2   3  17.082   7.297
  -2  -2   3  18.289   6.053
   1   2  -3  155.29   17.20
   1   2  -3  150.93   17.09
  -1  -2   3  139.76   16.06
  -1  -2   3  150.93   17.25
   0   2   3 1931.52  191.36
   0   2   3 1745.43  172.87
   0  -2  -3 1935.37  191.61
   0  -2  -3 1880.19  186.22
   0   2  -3 1931.52  191.61
   0   2  -3 2068.85  205.22
   0  -2   3 1855.80  184.17
   0  -2   3 2159.97  214.07
   1   2   3  475.89   49.06
   1   2   3  467.03   48.27
  -1  -2  -3  488.34   50.36
  -1  -2  -3  463.57   47.74
  -1   2  -3  507.84   51.86
  -1   2  -3  529.53   54.63
   1  -2   3  506.17   52.29
   1  -2   3  498.60   50.96
   2   2   3 2324.24  230.88
   2   2   3 2516.75  249.62
  -2  -2  -3 2224.14  221.00
  -2  -2  -3 2301.14  228.57
  -2   2  -3 2731.08  270.80
  -2   2  -3 2543.71  252.19
   2  -2   3 2829.91  280.30
   2  -2   3 2855.57  282.99
   3   2   3  61.950  14.656
   3   2   3  75.284  13.206
  -3  -2  -3  43.790  16.505
  -3  -2  -3  66.981  11.923
  -3   2  -3  62.181  13.155
  -3   2  -3  65.261  16.363
   3  -2   3  68.842  12.924
   3  -2   3  79.122  13.347
   3   3  -3  44.226   9.590
   3   3  -3  59.948  11.662
  -3  -3   3  44.996   9.759
  -3  -3   3  54.185   9.610
   2   3  -3  187.63   20.44
   2   3  -3  175.31   19.05
   1   3  -3  65.158  10.498
   1   3  -3  50.066   9.421
  -1  -3   3  71.729  11.331
  -1  -3   3  55.661  10.351
   0   3   3 1563.19  155.29
   0   3   3 1718.48  170.44
   0  -3  -3 1561.90  155.04
   0  -3  -3 1477.20  146.69
   0   3  -3 1713.34  170.31
   0   3  -3 1514.42  150.67
   0  -3   3 1497.73  149.00
   0  -3   3 1436.13  142.97
   1   3   3  13.193   9.805
   1   3   3  35.756  10.334
  -1  -3  -3  36.885  10.659
  -1  -3  -3  36.025  10.312
  -1   3  -3  39.863  10.575
  -1   3  -3  32.727   9.401
   1  -3   3  37.488  10.032
   1  -3   3  29.339   9.232
   2   3   3  58.190  11.330
   2   3   3  58.767  12.738
  -2  -3  -3  55.725  10.986
  -2   3  -3  44.739   9.605
  -2   3  -3  70.035  11.400
   2  -3   3  64.812  10.589
   2  -3   3  65.993  10.754
   3   3   3  33.497  11.439
   3   3   3  55.777  16.132
  -3  -3  -3  55.648  16.171
  -3  -3  -3  62.758  12.194
  -3   3  -3  53.672  10.428
  -3   3  -3  50.040  13.129
   3  -3   3  54.545  15.568
   3  -3   3  64.247  12.441
   3   4  -3  -3.038   8.204
   3   4  -3   3.785  11.652
  -3  -4   3  1.8725  8.5038
  -3  -4   3  -1.430   8.121
   2   4  -3  3.2829  8.4640
   2   4  -3  1.3540  7.5541
  -2  -4   3  11.164   8.078
  -2  -4   3  19.354   8.531
   1   4  -3 1094.62  109.28
   1   4  -3 1140.95  113.85
  -1  -4   3 1146.59  114.53
  -1  -4   3 1126.19  112.46
  -1   4   3 1085.37  107.52
  -1   4   3 1173.03  116.17
   1  -4  -3 1108.48  109.78
   1  -4  -3 1047.39  103.74
   0   4   3 1211.66  120.81
   0   4   3 1483.61  147.59
   0  -4  -3 1347.57  134.12
   0  -4  -3 1523.40  151.44
   0   4  -3 1439.98  143.61
   0   4  -3 1679.98  167.36
   0  -4   3 1469.50  146.56
   0  -4   3 1292.39  129.24
   1   4   3  552.89   56.66
   1   4   3  450.86   46.63
  -1  -4  -3  472.16   48.68
  -1  -4  -3  432.25   45.05
  -1   4  -3  521.96   53.79
  -1   4  -3  577.79   59.04
   1  -4   3  529.92   54.15
   1  -4   3  534.02   54.53
   2   4   3  24.924   9.147
   2   4   3  42.917  10.561
  -2  -4  -3  33.689  11.787
  -2  -4  -3  34.742  12.549
  -2   4  -3  17.069   8.769
  -2   4  -3  29.493   9.609
   2  -4   3  30.365  11.445
   2  -4   3  23.384   8.569
   3   4   3  13.168  10.729
   3   4   3  -6.115  11.374
  -3  -4  -3   2.422  10.039
  -3  -4  -3   9.777  11.598
  -3   4  -3  8.9825  8.8324
   3  -4   3   9.364  10.252
   3  -4   3   2.005  10.298
   3   5  -3  8.6925  8.5577
   3   5  -3  18.905  12.426
  -3  -5   3  14.887   9.335
  -3  -5   3  16.954   9.590
   2   5  -3  32.355   9.026
   2   5  -3  33.792   8.305
  -2  -5   3  24.757   8.986
  -2  -5   3  34.665   9.669
   1   5  -3 1029.42  103.02
   1   5  -3  842.43   84.74
  -1  -5   3 1123.88  112.93
  -1  -5   3  919.17   92.41
  -1   5   3  869.89   86.30
  -1   5   3  944.33   93.61
   1  -5  -3  841.40   83.50
   1  -5  -3  989.38   98.10
   0   5   3 1499.02  149.00
   0   5   3 1343.72  134.24
   0  -5  -3 1176.50  117.70
   0  -5  -3 1154.81  115.21
   0   5  -3 1217.69  122.15
   0   5  -3 1112.71  111.53
   0  -5   3 1232.45  123.17
   0  -5   3 1171.36  117.93
   1   5   3  788.01   79.65
   1   5   3  870.79   87.68
  -1  -5  -3  828.95   84.01
  -1  -5  -3  721.27   73.19
  -1   5  -3  934.19   93.75
  -1   5  -3  921.48   93.06
   1  -5   3  891.45   90.13
   1  -5   3  941.38   94.36
   2   5   3  234.35   26.18
   2   5   3  242.43   29.11
  -2  -5  -3  227.93   26.01
  -2  -5  -3  187.63   21.82
  -2   5  -3  220.75   24.73
  -2   5  -3  201.49   23.32
   2  -5   3  201.49   22.88
   2  -5   3  206.24   23.04
   3   5   3  18.378  11.854
   3   5   3  20.021  11.766
  -3  -5  -3  -1.421  11.470
  -3  -5  -3   3.283  11.009
  -3   5  -3   8.445  12.707
   3  -5   3  -7.111  14.900
   3  -5   3  7.5515  9.2675
   3   6  -3  56.316  12.713
   3   6  -3  51.901  14.297
  -3  -6   3  73.975  16.158
  -3  -6   3  68.226  13.450
   2   6  -3  228.83   25.21
  -2  -6   3  200.08   23.15
   1   6  -3 1930.24  191.87
   1   6  -3 1556.77  154.91
  -1  -6   3 2005.96  199.44
  -1  -6   3 1771.10  176.21
  -1   6   3 1751.85  173.39
  -1   6   3 1705.64  168.77
   1  -6  -3 1653.02  163.63
   1  -6  -3 1890.45  187.12
   0   6   3  366.67   38.21
   0   6   3  343.70   36.09
   0  -6  -3  374.88   39.00
   0  -6  -3  412.49   42.61
   0   6  -3  450.86   48.90
   0   6  -3  440.34   46.61
   0  -6   3  377.96   42.78
   0  -6   3  469.73   48.88
   1   6   3   0.373  13.437
   1   6   3  23.794   9.652
  -1  -6  -3  18.699  16.325
  -1  -6  -3  22.614  10.440
  -1   6  -3  16.363  10.106
  -1   6  -3  16.748   9.696
   1  -6   3  23.319   9.836
   1  -6   3  23.756   9.647
   2   6   3  43.174  11.021
   2   6   3  40.953  10.838
  -2  -6  -3  28.620  11.408
  -2  -6  -3  32.008  10.312
  -2   6  -3  25.296  12.747
  -2   6  -3  22.460   8.983
   2  -6   3  29.120  13.655
   2  -6   3  30.378   9.161
   3   6   3  10.396  12.357
  -3  -6  -3   3.138  17.506
  -3   6  -3  15.696  12.860
   3  -6   3  -4.278  15.016
   3  -6   3   2.016  11.982
   3   7  -3  8.7425  9.8206
   3   7  -3  -2.725  11.169
  -3  -7   3   5.510  11.823
  -3  -7   3   4.383  11.769
   2   7  -3  913.14   92.11
   2   7  -3  897.74   90.75
  -2  -7   3  972.95   98.31
  -2  -7   3 1098.34  110.57
   1   7  -3  144.51   18.34
   1   7  -3  167.61   20.80
  -1  -7   3  145.92   19.33
  -1  -7   3  160.04   20.80
  -1   7   3  170.82   18.04
  -1   7   3  156.32   16.62
   1  -7  -3  145.02   16.16
   1  -7  -3  151.31   16.16
   0   7   3  810.34   81.53
   0   7   3  717.17   72.44
   0  -7  -3  722.81   73.09
   0  -7  -3  793.53   79.79
   0   7  -3  673.66   68.73
   0   7  -3  711.26   72.90
   0  -7   3  796.48   80.73
   0  -7   3  774.53   79.44
   1   7   3  17.685   9.851
   1   7   3  18.327  10.263
  -1  -7  -3  18.584  12.651
  -1  -7  -3  10.260  10.086
  -1   7  -3  27.439  12.710
  -1   7  -3  13.489  10.826
   1  -7   3  28.902  10.492
   1  -7   3  12.439  10.117
   2   7   3  220.49   25.58
   2   7   3  209.71   24.51
  -2  -7  -3  188.28   25.10
  -2  -7  -3  188.40   22.59
  -2   7  -3  152.98   19.19
  -2   7  -3  159.27   20.50
   2  -7   3  150.41   19.67
   2  -7   3  162.61   19.80
   3   7   3  85.128  15.914
   3   7   3  74.771  13.899
  -3  -7  -3  96.396  16.864
  -3  -7  -3  79.930  15.799
   3  -7   3  38.399  12.160
   3  -7   3  49.052  14.130
   3   8  -3  67.327  14.656
  -3  -8   3  65.839  15.427
  -3  -8   3  59.948  14.798
   2   8  -3  75.349  12.847
   2   8  -3  55.186  11.176
  -2  -8   3  88.067  17.570
  -2  -8   3  55.507  12.240
   1   8  -3  238.71   26.87
  -1  -8   3  168.00   21.12
  -1   8   3  214.71   22.58
  -1   8   3  229.09   23.96
   1  -8  -3  231.65   24.24
   1  -8  -3  232.17   24.41
   0   8   3  371.55   38.82
   0   8   3  328.55   34.64
   0  -8  -3  322.65   34.32
   0  -8  -3  307.38   32.92
   0   8  -3  393.11   41.66
   0   8  -3  359.22   38.49
   0  -8   3  383.22   41.03
   0  -8   3  395.16   42.30
   1   8   3 1288.54  129.11
   1   8   3 1202.29  120.47
  -1  -8  -3 1188.95  119.20
  -1  -8  -3 1285.97  128.73
  -1   8  -3 1250.04  125.17
  -1   8  -3 1351.42  135.14
   1  -8   3 1169.18  117.20
   1  -8   3 1224.50  122.65
   2   8   3  413.13   43.65
   2   8   3  364.10   39.17
  -2  -8  -3  396.70   42.17
  -2  -8  -3  345.75   37.91
  -2   8  -3  354.35   38.10
  -2   8  -3  383.99   40.71
   2  -8   3  356.27   38.03
   2  -8   3  283.76   31.39
   3   8   3  56.341  14.053
   3   8   3  48.975  17.377
  -3  -8  -3  38.605  19.084
  -3  -8  -3  63.439  18.468
  -3   8  -3  37.809  18.738
   3  -8   3  26.027  12.563
   3  -8   3  20.226  13.643
   3   9  -3  39.863  13.219
   3   9  -3  59.678  14.169
  -3  -9   3  59.319  16.030
  -3  -9   3  49.142  14.862
   2   9  -3  22.973  10.419
   2   9  -3  16.979  10.520
  -2  -9   3  21.728  11.702
  -2  -9   3  18.455  12.043
  -2   9   3  11.252   3.618
  -2   9   3  14.425   4.023
   1   9  -3   7.756  10.342
   1   9  -3  11.777  12.224
  -1  -9   3  23.884  14.952
  -1  -9   3  13.822  10.999
   1  -9  -3  10.478   6.029
   1  -9  -3  18.212   8.908
   0   9   3  25.989   9.300
   0   9   3   8.426  14.451
   0  -9  -3  23.935   9.975
   0  -9  -3  38.361  17.185
   0   9  -3  14.502  10.911
   0   9  -3  12.745  11.284
   0  -9   3  12.911  12.259
   0  -9   3  15.324  11.461
   1   9   3  121.44   16.95
   1   9   3  125.62   17.71
  -1  -9  -3  121.45   17.58
  -1  -9  -3  147.46   21.47
  -1   9  -3  106.74   16.12
  -1   9  -3  155.42   20.83
   1  -9   3  127.90   17.80
   1  -9   3  96.987  15.542
   2   9   3  13.437  11.012
   2   9   3  -1.001  13.578
  -2  -9  -3  10.117  11.594
  -2  -9  -3  11.058  11.683
  -2   9  -3  -8.332  10.894
  -2   9  -3  0.0413  9.3162
   2  -9   3   4.559  10.351
   2  -9   3  -9.425  12.113
   3   9   3   4.908  11.991
   3   9   3  -2.853  13.732
  -3  -9  -3  13.168  13.771
  -3  -9  -3  12.322  15.131
  -3   9  -3   8.641  13.630
   3  -9   3  -2.115  17.634
   3  10  -3  41.210  12.885
   3  10  -3  49.257  15.491
  -3 -10   3  45.278  16.671
  -3 -10   3  74.899  21.176
   2  10  -3  13.501  10.253
   2  10  -3   6.153  11.372
  -2 -10   3  -3.201  13.527
  -2 -10   3  -1.138  12.688
  -2  10   3  -3.185   5.743
  -2  10   3  0.3899  5.3005
   2 -10  -3  1.7082  3.4254
   1  10  -3 1195.49  119.82
   1  10  -3 1378.38  137.71
  -1 -10   3  934.70   94.60
  -1 -10   3  963.45   97.37
  -1  10   3 1010.68  100.89
  -1  10   3 1086.79  108.45
   1 -10  -3  933.42   93.41
   1 -10  -3 1063.81  106.39
   0  10   3 1100.13  110.17
   0  10   3 1008.76  101.27
   0 -10  -3 1005.93  101.31
   0 -10  -3 1195.36  119.60
   0  10  -3 1325.76  132.83
   0  10  -3 1287.25  128.85
   0 -10   3 1049.95  105.91
   1  10   3  266.56   29.52
   1  10   3  268.74   30.34
  -1 -10  -3  280.94   31.34
  -1 -10  -3  297.49   33.39
  -1  10  -3  342.16   37.03
  -1  10  -3  275.29   30.49
   1 -10   3  268.36   29.90
   1 -10   3  300.70   33.33
   2  10   3  336.12   38.67
   2  10   3  332.02   36.69
  -2 -10  -3  324.57   36.36
  -2 -10  -3  341.51   38.10
  -2  10  -3  328.42   36.68
  -2  10  -3  320.59   35.01
   2 -10   3  308.15   33.92
   2 -10   3  324.32   35.47
   3  10   3  20.291  19.495
   3  10   3  14.952  13.283
  -3 -10  -3  24.590  17.249
  -3  10  -3  22.434  15.375
   3 -10   3  18.917  14.002
   3 -10   3   5.589  13.540
   3  11  -3   2.381  13.540
   3  11  -3  17.339  17.814
  -3 -11   3  -19.83   16.40
  -3 -11   3   6.497  14.284
   2  11  -3   0.014  11.918
   2  11  -3  -11.07   10.67
  -2 -11   3   6.988  14.746
  -2 -11   3   4.217  16.967
  -2  11   3  5.5225  5.4660
   2 -11  -3  2.1189  5.8883
   2 -11  -3  6.3631  6.0654
   1  11  -3  15.889  11.026
   1  11  -3  18.109  10.180
  -1 -11   3  33.664  12.411
  -1 -11   3  26.207  12.490
  -1  11   3  9.9874  5.8754
  -1  11   3  16.633   8.162
   1 -11  -3  19.559   9.602
   1 -11  -3   2.151  10.769
   0  11   3  59.717  11.099
   0  11   3  82.587  13.245
   0 -11  -3  66.930  12.381
   0 -11  -3  58.113  12.147
   0  11  -3  99.720  15.953
   0  11  -3  70.908  13.360
   0 -11   3  80.200  14.618
   0 -11   3  59.973  13.335
   1  11   3  448.81   47.72
   1  11   3  407.87   43.21
  -1 -11  -3  483.59   50.93
  -1 -11  -3  565.72   59.70
  -1  11  -3  457.15   48.19
  -1  11  -3  532.48   55.40
   1 -11   3  378.99   40.80
   1 -11   3  600.25   62.93
   2  11   3  14.066  12.146
   2  11   3  11.945  11.993
  -2 -11  -3   6.525  13.437
  -2 -11  -3  -0.202  13.938
  -2  11  -3  11.936  11.225
  -2  11  -3  14.554  11.943
   2 -11   3   2.564  11.001
   2 -11   3  11.127  15.837
   2  12  -3  39.811  12.318
   2  12  -3  54.339  14.387
  -2 -12   3  55.892  20.817
  -2 -12   3  36.949  16.594
  -2  12   3  42.994   8.193
   2 -12  -3  49.924  11.213
   1  12  -3  10.512  15.041
   1  12  -3  -2.486  10.148
  -1 -12   3  -0.011  11.631
  -1 -12   3   8.419  14.862
  -1  12   3  4.7986  6.7173
  -1  12   3  9.6512  6.0898
   1 -12  -3  -3.871   9.765
   1 -12  -3  -1.092   8.630
   0  12   3  6.5364  8.3986
   0  12   3  13.899   9.306
   0 -12  -3  8.8709  9.8527
   0 -12  -3   7.400  10.049
   0  12  -3   2.890  10.620
   0  12  -3   5.218  10.654
   0 -12   3   8.061  11.598
   0 -12   3   2.279  11.594
   1  12   3   5.671  10.960
   1  12   3  4.3815  9.8103
  -1 -12  -3  -10.77   11.78
  -1 -12  -3   5.723  12.467
  -1  12  -3  -4.462  18.686
  -1  12  -3   4.813  11.789
   1 -12   3  -9.637  11.990
   1 -12   3   9.537  12.554
   2  12   3  116.70   18.43
   2  12   3  105.55   17.06
  -2 -12  -3  112.89   19.41
  -2 -12  -3  151.18   21.78
  -2  12  -3  61.847  16.723
  -2  12  -3  106.83   17.81
   2 -12   3  115.57   19.28
   2  13  -3  25.719  14.015
   2  13  -3  14.233  16.877
  -2 -13   3  31.841  15.555
  -2 -13   3   5.644  22.229
  -2  13   3  19.585   7.770
   2 -13  -3  22.639  12.790
   2 -13  -3   7.457  12.241
   1  13  -3  154.01   20.73
   1  13  -3  141.94   19.28
  -1 -13   3  181.99   24.51
  -1 -13   3  184.94   23.90
  -1  13   3  135.53   16.53
  -1  13   3  126.21   15.13
   1 -13  -3  150.67   18.80
   1 -13  -3  144.64   17.88
   0  13   3  82.010  12.778
   0  13   3  96.820  19.700
   0 -13  -3  126.45   17.56
   0  13  -3  71.280  13.797
   0  13  -3  107.69   16.24
   0 -13   3  110.80   17.53
   0 -13   3  54.416  13.886
   1  13   3  16.004  11.262
   1  13   3  20.534  12.081
  -1 -13  -3  37.989  13.681
  -1 -13  -3  41.069  14.887
  -1  13  -3  45.304  13.155
  -1  13  -3  14.079  18.481
   1 -13   3  31.777  13.912
   1 -13   3  17.903  17.313
   2  13   3  -1.627  12.924
   2  13   3   5.475  12.571
  -2 -13  -3  -12.74   14.98
  -2 -13  -3  -1.012  14.515
  -2  13  -3   8.297  13.604
  -2  13  -3  -2.166  13.617
   2 -13   3  -3.774  13.566
   2 -13   3   2.705  14.400
   2  14  -3  -10.67   15.44
   2  14  -3   0.876  13.925
  -2 -14   3   8.718  17.403
  -2 -14   3   6.713  15.080
  -2  14   3  5.0297  8.7669
   2 -14  -3  -6.029   9.582
   1  14  -3  20.778  13.245
   1  14  -3  34.062  12.314
  -1 -14   3  15.581  16.158
  -1 -14   3  31.174  14.207
  -1  14   3  13.707   8.948
  -1  14   3  25.719  10.406
   1 -14  -3  31.944  10.561
   1 -14  -3  16.813  14.682
   0  14   3   8.046  17.801
   0  14   3  23.563  10.627
   0 -14  -3  14.002  12.000
   0 -14  -3  36.834  21.048
   0  14  -3  18.430  12.010
   0  14  -3  23.230  12.505
   0 -14   3  15.491  13.963
   0 -14   3   9.473  13.373
   1  14   3  43.738  13.424
   1  14   3  49.462  14.721
  -1 -14  -3  66.018  17.031
  -1 -14  -3  32.034  13.951
  -1  14  -3  40.645  13.476
  -1  14  -3  17.814  15.029
   1 -14   3  16.607  14.785
   2  14   3  14.618  14.887
   2  14   3  12.038  15.683
  -2 -14  -3  20.599  17.467
  -2 -14  -3  -8.319  16.068
  -2  14  -3   3.569  14.156
  -2  14  -3  17.493  15.427
   2 -14   3   8.134  17.493
   2 -14   3  -7.585  13.912
   2  15  -3  286.84   32.68
   2  15  -3  313.79   38.73
  -2 -15   3  304.04   39.61
  -2 -15   3  215.74   29.42
  -2  15   3  225.11   29.39
   2 -15  -3  220.36   25.95
   1  15  -3  780.18   79.64
   1  15  -3  967.17   98.06
  -1 -15   3  717.81   74.63
  -1 -15   3  962.30   97.91
  -1  15   3  762.86   77.34
  -1  15   3  683.80   69.93
   1 -15  -3  606.67   62.33
   1 -15  -3  699.71   72.09
   0  15   3  316.49   35.08
   0  15   3  320.59   36.17
   0 -15  -3  310.58   35.87
   0 -15  -3  398.50   42.76
   0  15  -3  285.94   32.87
   0  15  -3  278.76   31.82
   0 -15   3  242.05   28.92
   0 -15   3  363.97   40.41
   1  15   3  13.707  12.140
   1  15   3  -4.543  12.834
  -1 -15  -3  -8.642  13.630
  -1 -15  -3  12.341  15.362
  -1  15  -3   5.610  14.361
  -1  15  -3  -4.258  13.617
   1 -15   3  -3.216  15.067
   1 -15   3  -7.061  13.938
   2  15   3   6.847  18.134
   2  15   3   4.420  14.798
  -2 -15  -3  -10.02   16.44
  -2 -15  -3  -0.893  19.341
  -2  15  -3  17.865  22.164
   2 -15   3  21.536  19.444
   2 -15   3   9.042  24.256
   2  16  -3  -2.551  13.591
   2  16  -3  17.685  14.887
  -2 -16   3  19.405  16.659
  -2 -16   3   1.666  15.375
  -2  16   3  26.900  21.972
  -2  16   3  10.498  19.495
   2 -16  -3   3.013  14.785
   2 -16  -3  25.796  19.495
   1  16  -3  83.742  20.496
   1  16  -3  95.524  22.870
  -1 -16   3  118.03   24.59
  -1 -16   3  142.71   23.85
  -1  16   3  122.77   17.72
   1 -16  -3  129.88   18.62
   1 -16  -3  84.012  16.890
   0  16   3  21.728  14.092
   0  16   3  26.374  11.308
   0 -16  -3  29.608  14.246
   0 -16  -3  13.181  15.735
   0  16  -3  25.232  13.232
   0  16  -3  20.355  13.951
   0 -16   3  26.425  15.273
   0 -16   3  49.167  16.428
   1  16   3  12.834  13.732
   1  16   3   3.510  13.476
  -1 -16  -3  13.322  15.221
  -1 -16  -3  10.193  16.659
  -1  16  -3  13.052  13.951
  -1  16  -3   7.964  19.046
   1 -16   3   2.178  15.978
   1 -16   3  15.619  20.740
   1  17  -3  285.56   34.37
   1  17  -3  301.34   35.94
  -1 -17   3  237.17   31.67
  -1 -17   3  337.79   40.12
  -1  17   3  236.53   29.21
  -1  17   3  286.33   33.00
   1 -17  -3  270.80   31.93
   0  17   3  154.65   21.91
   0  17   3  151.18   21.18
   0 -17  -3  138.09   24.33
   0 -17  -3  133.99   20.71
   0  17  -3  146.44   24.73
   0  17  -3  118.69   18.56
   0 -17   3  224.72   29.11
   0 -17   3  162.09   32.88
   1  17   3   0.533  16.017
   1  17   3  14.952  15.183
  -1 -17  -3  -4.989  18.443
  -1 -17  -3  19.739  16.440
  -1  17  -3  -0.084  15.067
  -1  17  -3  -13.57   14.50
   1 -17   3   3.939  14.477
   1 -17   3   8.237  16.838
   1  18  -3  27.747  18.802
   1  18  -3  24.667  16.376
  -1 -18   3  74.283  20.586
  -1 -18   3  36.218  21.112
  -1  18   3  25.989  16.274
  -1  18   3  47.820  13.566
   1 -18  -3  58.292  14.836
   1 -18  -3  40.081  15.863
   0  18   3  -4.219  15.131
   0  18   3  21.305  12.860
   0 -18  -3  17.172  14.721
   0 -18  -3  16.184  16.132
   0  18  -3   1.512  13.527
   0  18  -3  -2.935  16.055
   0 -18   3  17.493  16.736
   0 -18   3  -7.953  16.402
   1  18   3   8.064  16.633
   1  18   3  31.931  15.991
  -1 -18  -3  -0.108  17.968
  -1 -18  -3  12.763  17.352
  -1  18  -3   3.393  17.993
   1 -18   3  11.445  18.776
  -2   0   4  18.199   4.189
  -2   0   4  12.073   3.631
   2   0  -4  9.6088  3.1148
   2   0  -4  14.413   3.894
  -1   0   4 1531.10  151.57
  -1   0   4 1495.17  147.98
   1   0  -4 1617.09  160.04
   1   0  -4 1534.95  151.96
   0   0  -4  476.66   48.71
   0   0  -4  545.96   55.82
   0   0   4  494.62   50.50
   0   0   4  437.64   45.10
  -1   0  -4 1859.65  184.94
  -1   0  -4 1782.65  176.98
   1   0   4 1822.43  181.09
   1   0   4 1733.88  172.49
  -2   0  -4 8687.36  858.34
  -2   0  -4 9305.96  920.33
   2   0   4 9800.07  967.94
   2   0   4 9999.00  987.96
  -3   0  -4 2863.27  284.15
  -3   0  -4 2842.74  282.61
   3   0   4 2985.20  296.21
   3   0   4 2983.91  296.21
  -3  -1   4  84.474  11.122
   2   1  -4  110.22   12.41
   2   1  -4  103.21   11.75
  -2  -1   4  105.38   12.14
  -2  -1   4  116.78   13.24
   1   1  -4  385.28   38.90
   1   1  -4  413.00   42.06
  -1  -1   4  464.98   47.32
  -1  -1   4  286.33   29.53
  -1   1   4  375.52   37.55
  -1   1   4  392.34   39.23
   1  -1  -4  409.79   40.88
   1  -1  -4  403.25   40.27
   0   1   4  606.41   61.33
   0   1   4  611.80   61.72
   0  -1  -4  506.94   51.58
   0  -1  -4  595.24   60.06
   0   1  -4  539.16   55.11
   0   1  -4  548.78   55.97
   0  -1   4  488.85   50.35
   0  -1   4  567.01   57.87
   1   1   4  21.330   9.749
   1   1   4  29.043   9.976
  -1  -1  -4  15.183   9.457
  -1  -1  -4  20.650  10.138
  -1   1  -4  27.439  10.041
  -1   1  -4  27.388  14.425
   1  -1   4  10.809   8.859
   1  -1   4  20.355   9.610
   2   1   4  81.265  13.039
   2   1   4  74.527  12.110
  -2  -1  -4  83.691  13.643
  -2   1  -4  120.50   15.90
  -2   1  -4  119.59   18.19
   2  -1   4  112.75   15.32
   2  -1   4  90.570  13.129
   3   1   4  220.87   25.64
   3   1   4  208.42   24.65
  -3  -1  -4  203.93   23.77
  -3  -1  -4  207.53   25.10
  -3   1  -4  254.37   29.57
  -3   1  -4  287.61   33.45
   3  -1   4  319.18   35.28
   3  -1   4  260.92   29.12
   3   2  -4  122.74   15.29
  -3  -2   4  122.53   15.05
   2   2  -4  419.03   42.35
   2   2  -4  454.84   45.83
  -2  -2   4  481.15   48.62
  -2  -2   4  457.41   46.19
   1   2  -4 1011.45  100.75
   1   2  -4 1197.29  119.27
  -1  -2   4 1076.13  107.10
  -1  -2   4 1009.53  100.70
  -1   2   4 1096.54  108.61
  -1   2   4 1123.49  111.28
   1  -2  -4 1102.96  109.22
   1  -2  -4 1128.75  111.78
   0   2   4  551.74   56.11
   0   2   4  522.47   53.09
   0  -2  -4  497.58   50.67
   0   2  -4  535.56   55.31
   0   2  -4  539.54   55.56
   0  -2   4  499.12   51.86
   0  -2   4  419.80   44.06
   1   2   4  31.841  10.625
  -1  -2  -4  30.083  10.488
  -1  -2  -4  33.317  10.198
  -1   2  -4  43.738  10.784
  -1   2  -4  35.845  13.450
   1  -2   4  27.773  10.274
   1  -2   4  38.207  13.874
   2   2   4 1320.62  132.06
   2   2   4 1356.56  135.53
  -2  -2  -4 1212.95  121.42
  -2  -2  -4 1132.73  113.44
  -2   2  -4 1232.45  123.12
  -2   2  -4 1203.58  120.29
   2  -2   4 1287.25  128.34
   2  -2   4 1320.62  131.81
   3   2   4  259.89   29.42
   3   2   4  278.63   30.94
  -3  -2  -4  270.93   30.96
  -3  -2  -4  246.41   28.67
  -3   2  -4  278.88   32.00
  -3   2  -4  280.55   30.94
   3  -2   4  262.07   31.74
   3  -2   4  284.15   31.67
   3   3  -4  4.6472  7.1267
   3   3  -4  31.739  14.939
  -3  -3   4  9.2944  7.1768
  -3  -3   4  16.633   6.909
   2   3  -4  9.4048  6.0487
   2   3  -4  6.1578  5.5122
  -2  -3   4  6.1552  6.5608
  -2  -3   4  9.0621  9.2803
   1   3  -4 1690.24  167.74
   1   3  -4 1778.80  176.47
  -1  -3   4 1917.41  190.20
  -1  -3   4 1578.59  156.96
  -1   3   4 2095.80  207.53
   1  -3  -4 1765.96  174.80
   0   3   4  29.159  12.076
   0   3   4  30.981   9.837
   0  -3  -4  26.926   8.871
   0  -3  -4  30.802   9.558
   0   3  -4  29.518  11.640
   0   3  -4  29.262  14.977
   0  -3   4  23.268  12.285
   0  -3   4  16.004  11.747
   1   3   4  38.874  13.206
   1   3   4  34.588  10.566
  -1  -3  -4  12.367   9.267
  -1  -3  -4  30.057  10.343
  -1   3  -4  28.004   9.886
  -1   3  -4  29.300  10.673
   1  -3   4  28.581  10.432
   1  -3   4  21.933   9.579
   2   3   4  667.11   68.07
   2   3   4  621.94   63.49
  -2  -3  -4  649.66   66.26
  -2  -3  -4  601.79   61.59
  -2   3  -4  663.90   67.25
  -2   3  -4  587.67   59.96
   2  -3   4  729.87   73.80
   2  -3   4  650.04   66.17
   3   3   4  59.306  12.924
   3   3   4  58.125  13.001
  -3  -3  -4  50.130  11.683
  -3  -3  -4  61.976  13.963
  -3   3  -4  38.066  11.481
  -3   3  -4  45.984  14.336
   3  -3   4  48.269  13.142
   3  -3   4  37.552  11.910
   3   4  -4  32.663  11.263
   3   4  -4  57.330  11.547
  -3  -4   4  55.636  12.579
  -3  -4   4  45.689  12.582
   2   4  -4  364.62   37.77
  -2  -4   4  459.59   47.74
  -2  -4   4  364.23   37.90
   1   4  -4  270.80   30.19
   1   4  -4  327.65   34.40
  -1  -4   4  258.99   28.27
  -1  -4   4  232.94   26.03
  -1   4   4  340.87   34.05
  -1   4   4  348.57   34.83
   1  -4  -4  340.23   33.97
   1  -4  -4  309.17   30.92
   0   4   4  36.782   9.400
   0   4   4  28.453   9.318
   0  -4  -4  37.925   9.631
   0  -4  -4  29.390   9.053
   0   4  -4  10.784  10.754
   0  -4   4  27.953  11.712
   1   4   4  77.004  18.378
   1   4   4  55.982  12.147
  -1  -4  -4  58.921  12.100
  -1  -4  -4  52.786  11.715
  -1   4  -4  94.074  14.605
  -1   4  -4  82.972  13.373
   1  -4   4  82.536  12.924
   1  -4   4  61.911  12.649
   2   4   4  372.06   39.40
  -2  -4  -4  372.32   39.46
  -2  -4  -4  359.87   38.25
  -2   4  -4  493.34   51.11
  -2   4  -4  397.86   42.65
   2  -4   4  407.35   42.52
   2  -4   4  465.75   48.58
   3   4   4  19.328  15.581
   3   4   4  -0.839  12.536
  -3  -4  -4   6.979  10.743
  -3  -4  -4  -11.90   14.82
  -3   4  -4   8.100  13.078
  -3   4  -4   2.382  10.068
   3  -4   4   6.766  11.412
   3  -4   4   0.135  10.841
   3   5  -4  -3.451   8.979
   3   5  -4  1.5439  8.9351
   2   5  -4  110.30   13.63
   2   5  -4  110.62   13.87
  -2  -5   4  163.76   19.65
  -2  -5   4  166.84   20.19
   1   5  -4 5179.82  512.08
   1   5  -4 5391.58  533.13
  -1  -5   4 5500.67  544.03
  -1  -5   4 7405.24  731.80
  -1   5   4 5966.54  589.34
  -1   5   4 6250.18  617.45
   1  -5  -4 6247.61  617.06
   1  -5  -4 5482.70  541.60
   0   5   4  369.24   38.34
   0   5   4  326.11   34.23
   0  -5  -4  340.36   35.56
   0  -5  -4  310.97   32.61
   0   5  -4  308.40   33.78
   0   5  -4  322.39   34.87
   0  -5   4  258.61   29.20
   0  -5   4  304.30   33.73
   1   5   4  217.41   24.98
   1   5   4  238.33   27.41
  -1  -5  -4  219.21   25.04
  -1  -5  -4  193.67   22.74
  -1   5  -4  203.03   23.58
  -1   5  -4  204.06   24.04
   1  -5   4  155.93   19.79
   1  -5   4  197.39   23.14
   2   5   4  15.670  12.391
   2   5   4  8.0572  9.3509
  -2  -5  -4   9.746  12.337
  -2  -5  -4  12.975  13.951
  -2   5  -4   3.790  10.272
  -2   5  -4  2.3550  9.6153
   2  -5   4  11.932   9.973
   2  -5   4 -0.0182  9.0814
   3   5   4  -4.387  13.360
   3   5   4   7.958  11.658
  -3  -5  -4  -1.109  11.918
  -3  -5  -4  18.224  10.967
  -3   5  -4  10.506  18.186
  -3   5  -4  -1.032   9.800
   3  -5   4   9.184  11.942
   3   6  -4  11.273   9.860
   3   6  -4  17.236   9.492
  -3  -6   4  29.929  10.804
  -3  -6   4   5.028  10.729
   2   6  -4  31.084   8.536
  -2  -6   4  43.636  11.178
   1   6  -4  20.534  10.320
   1   6  -4  24.988  10.242
  -1  -6   4  37.347  16.248
  -1  -6   4  16.505  15.529
  -1   6   4  26.515   4.738
  -1   6   4  19.084   4.129
   1  -6  -4  20.753   5.007
   1  -6  -4  33.484   5.368
   0   6   4  100.61   16.30
   0   6   4  115.21   15.07
   0  -6  -4  69.650  11.538
   0  -6  -4  109.50   17.72
   0   6  -4  123.76   17.40
   0   6  -4  82.780  17.788
   0  -6   4  92.546  15.362
   0  -6   4  61.167  17.506
   1   6   4 1610.67  160.81
  -1  -6  -4 1472.06  147.21
  -1   6  -4 1732.60  172.62
  -1   6  -4 1591.42  158.76
   1  -6   4 1374.53  137.45
   1  -6   4 1285.97  128.60
   2   6   4  7.1588  9.2829
   2   6   4  7.0934  9.2841
  -2  -6  -4  8.6437  9.1751
  -2  -6  -4  -1.539  10.121
  -2   6  -4  2.0483  9.4844
  -2   6  -4   2.571  10.229
   3   6   4   5.983  13.142
   3   6   4   8.817  12.600
  -3  -6  -4   0.928  11.710
  -3  -6  -4   1.914  12.282
  -3   6  -4  12.873  17.133
  -3   6  -4  3.9362  9.8411
   3  -6   4   2.567  17.300
   3  -6   4   2.211  10.692
   3   7  -4  45.407  12.159
   3   7  -4  15.709  10.166
  -3  -7   4  24.256  12.317
  -3  -7   4  21.921  15.658
   2   7  -4  40.183   9.830
  -2  -7   4  42.121  14.233
  -2  -7   4  58.459  11.851
   1   7  -4 1106.68  110.94
   1   7  -4 1020.56  102.43
  -1  -7   4 1285.97  128.85
  -1  -7   4  977.57   98.49
  -1   7   4  944.46   93.88
  -1   7   4  981.29   97.60
   1  -7  -4  937.78   93.18
   0   7   4  102.88   14.03
   0   7   4  133.35   16.80
   0  -7  -4  136.43   16.79
   0  -7  -4  111.86   14.95
   0   7  -4  93.342  15.350
   0   7  -4  101.06   19.10
   0  -7   4  74.399  14.194
   0  -7   4  74.245  18.879
   1   7   4  372.70   40.85
   1   7   4  410.05   42.97
  -1  -7  -4  342.54   36.77
  -1   7  -4  381.94   40.59
  -1   7  -4  387.84   41.93
   1  -7   4  407.61   43.02
   1  -7   4  361.53   38.67
   2   7   4  -2.562  10.018
   2   7   4  5.0374  9.7629
  -2  -7  -4   4.398  10.756
  -2  -7  -4  12.937   9.937
  -2   7  -4  12.814  10.525
  -2   7  -4   9.593  10.023
   2  -7   4  13.989  10.796
   2  -7   4  12.717  10.307
   3   7   4  98.014  18.160
   3   7   4  92.290  16.979
  -3  -7  -4  107.92   17.21
  -3  -7  -4  108.51   17.94
  -3   7  -4  46.973  15.311
  -3   7  -4  61.642  16.043
   3  -7   4  93.573  17.454
   3   8  -4  -4.501  10.917
   3   8  -4  14.823  11.466
  -3  -8   4   6.156  13.116
  -3  -8   4   7.268  12.539
   2   8  -4   1.119  12.776
   2   8  -4  9.1314  9.1892
  -2  -8   4  -0.267  10.384
  -2  -8   4  13.835  17.595
   1   8  -4   2.748  10.320
   1   8  -4  -4.672  10.611
  -1  -8   4  -1.366  10.765
  -1  -8   4   8.622  11.614
   1  -8  -4  3.3009  6.1552
   1  -8  -4  4.0427  5.2299
   0   8   4  31.995   9.862
   0   8   4  48.397  13.476
   0  -8  -4  26.887   9.475
   0  -8  -4  40.825  12.975
   0   8  -4  27.054  11.855
   0  -8   4  40.042  12.783
   1   8   4  125.38   17.13
   1   8   4  170.69   20.44
  -1  -8  -4  155.04   19.49
  -1  -8  -4  156.45   20.02
  -1   8  -4  130.01   22.14
   2   8   4  34.896  11.729
   2   8   4  31.264  11.239
  -2  -8  -4  40.068  12.539
  -2  -8  -4  36.500  11.922
  -2   8  -4  26.541  13.104
  -2   8  -4  32.547  14.875
   2  -8   4  30.930  15.735
   2  -8   4  35.781  11.869
   3   8   4  19.970  12.502
   3   8   4  30.186  13.514
  -3  -8  -4  16.556  14.323
  -3  -8  -4  32.611  14.759
  -3   8  -4  -0.031  14.028
  -3   8  -4  14.336  10.464
   3  -8   4  16.877  13.065
   3  -8   4   9.468  12.847
   3   9  -4  50.130  19.456
   3   9  -4  55.045  13.899
  -3  -9   4  25.014  17.518
  -3  -9   4  72.846  16.864
   2   9  -4  129.75   17.44
   2   9  -4  145.79   20.95
  -2  -9   4  190.97   28.92
  -2  -9   4  129.24   18.64
   1   9  -4  357.17   37.98
   1   9  -4  330.09   36.74
  -1  -9   4  330.35   37.37
  -1  -9   4  360.25   38.63
  -1   9   4  285.17   29.48
  -1   9   4  267.46   27.58
   1  -9  -4  330.60   33.91
   1  -9  -4  294.67   30.93
   0   9   4  111.44   14.91
   0   9   4  92.174  13.373
   0  -9  -4  101.62   14.31
   0  -9  -4  86.258  13.078
   0   9  -4  100.62   16.11
   0   9  -4  117.62   17.54
   0  -9   4  98.745  16.761
   0  -9   4  98.822  16.209
   1   9   4 1020.31  103.56
   1   9   4 1014.79  102.22
  -1  -9  -4  992.58  100.11
  -1  -9  -4 1091.02  110.10
  -1   9  -4 1100.01  111.26
  -1   9  -4 1006.57  101.77
   1  -9   4  918.92   93.14
   1  -9   4 1066.00  108.26
   2   9   4  134.24   22.10
   2   9   4  147.59   19.64
  -2  -9  -4  127.35   18.43
  -2  -9  -4  153.37   23.28
  -2   9  -4  136.81   19.28
  -2   9  -4  117.34   24.09
   2  -9   4  83.601  15.555
   2  -9   4  114.51   17.07
   3   9   4   7.354  12.617
   3   9   4  26.900  15.080
  -3  -9  -4  23.255  15.786
  -3  -9  -4   0.693  18.648
  -3   9  -4   5.395  11.590
  -3   9  -4  13.976  16.235
   3  -9   4   0.286  14.040
   3  -9   4   1.459  14.015
   3  10  -4  16.120  15.722
   3  10  -4  29.108  14.823
  -3 -10   4  39.657  20.226
  -3 -10   4  57.573  24.243
   2  10  -4   1.354  11.121
  -2 -10   4   8.888  13.129
  -2 -10   4   8.026  19.572
   1  10  -4   9.787  10.113
   1  10  -4  11.562  10.660
  -1 -10   4   7.291  10.740
  -1 -10   4  13.951  11.234
  -1  10   4  16.505   8.151
  -1  10   4  11.027   5.367
   1 -10  -4  5.0412  6.8328
   1 -10  -4  16.800  10.960
   0  10   4  57.548  10.995
   0  10   4  49.693  13.501
   0 -10  -4  55.879  11.741
   0  10  -4  37.912  11.447
   0  10  -4  52.645  12.461
   0 -10   4  50.297  12.690
   0 -10   4  37.398  12.199
   1  10   4  88.131  14.271
   1  10   4  102.86   15.99
  -1 -10  -4  122.67   17.45
  -1 -10  -4  94.741  15.465
  -1  10  -4  62.181  20.278
  -1  10  -4  117.12   17.93
   1 -10   4  75.028  14.836
   1 -10   4  55.790  16.594
   2  10   4  20.637  13.527
   2  10   4  -1.161  11.777
  -2 -10  -4  25.424  14.092
  -2 -10  -4  -1.054  12.873
  -2  10  -4  26.733  20.008
   2 -10   4  -10.10   15.79
   2 -10   4   3.771  11.829
   3  10   4  12.437  16.158
   3  10   4  -7.885  18.301
  -3 -10  -4   7.172  16.517
  -3 -10  -4  30.160  23.858
  -3  10  -4   9.673  14.579
  -3  10  -4  -7.183  18.109
   3 -10   4  14.194  14.849
   3 -10   4  -7.279  19.854
   3  11  -4  457.79   49.81
   3  11  -4  515.80   57.87
  -3 -11   4  430.33   46.68
  -3 -11   4  451.89   50.80
   2  11  -4  14.490  16.351
   2  11  -4  20.688  12.309
  -2 -11   4  16.325  19.379
  -2 -11   4   6.105  14.579
  -2  11   4  14.772   7.440
   1  11  -4  73.039  13.373
   1  11  -4  65.762  13.091
  -1 -11   4  84.884  15.170
  -1 -11   4  58.421  17.429
  -1  11   4  53.929   9.265
  -1  11   4  43.841   9.450
   1 -11  -4  49.206  12.095
   1 -11  -4  41.313   8.843
   0  11   4  10.548   8.752
   0  11   4  13.540   8.608
   0 -11  -4  19.803   9.506
   0 -11  -4  18.905   9.781
   0  11  -4   5.104  10.362
   0  11  -4  30.789  12.169
   0 -11   4  11.531  11.744
   0 -11   4  16.145  11.732
   1  11   4  202.91   24.33
   1  11   4  183.01   22.10
  -1 -11  -4  210.61   25.17
  -1 -11  -4  184.04   22.72
  -1  11  -4  173.77   22.14
  -1  11  -4  203.68   25.23
   1 -11   4  217.54   26.53
   1 -11   4  171.21   22.13
   2  11   4  76.568  15.901
  -2 -11  -4  59.986  15.478
  -2 -11  -4  55.751  18.969
  -2  11  -4  57.856  23.255
  -2  11  -4  55.828  14.502
   2 -11   4  38.707  13.270
   2 -11   4  44.508  14.669
   2  12  -4  13.886  12.032
   2  12  -4  22.190  17.647
  -2 -12   4   7.464  15.606
  -2 -12   4  16.864  15.324
  -2  12   4  9.5267  5.5469
   1  12  -4  199.44   26.19
   1  12  -4  186.48   24.69
  -1 -12   4  292.49   32.92
  -1 -12   4  255.78   30.66
  -1  12   4  206.88   22.66
   1 -12  -4  204.19   22.64
   1 -12  -4  249.88   27.18
   0  12   4  55.995  11.300
   0  12   4  56.996  10.883
   0 -12  -4  74.360  13.142
   0 -12  -4  50.887  11.702
   0  12  -4  38.399  12.784
   0  12  -4  65.595  13.797
   0 -12   4  47.730  12.911
   0 -12   4  52.389  13.489
   1  12   4  129.37   17.26
   1  12   4  115.76   17.45
  -1 -12  -4  136.68   19.38
  -1 -12  -4  137.07   19.42
  -1  12  -4  100.70   18.07
  -1  12  -4  138.86   20.57
   1 -12   4  120.23   19.23
   1 -12   4  80.649  16.453
   2  12   4  11.031  13.373
   2  12   4  14.413  12.197
  -2 -12  -4   4.941  14.400
  -2 -12  -4  -7.312  13.335
  -2  12  -4   7.281  13.912
  -2  12  -4  16.646  14.066
   2 -12   4   7.251  12.549
   2 -12   4  13.540  19.521
   2  13  -4  22.947  11.719
   2  13  -4  32.855  14.079
  -2 -13   4   3.093  14.143
  -2 -13   4  31.841  16.505
  -2  13   4  16.248   9.233
   2 -13  -4  3.2701  6.4940
   1  13  -4  81.509  15.093
   1  13  -4  78.917  15.157
  -1 -13   4  51.169  15.362
  -1 -13   4  75.284  17.313
  -1  13   4  72.320  11.714
  -1  13   4  55.340  11.166
   1 -13  -4  81.021  12.380
   1 -13  -4  59.614  11.553
   0  13   4  253.86   28.40
   0  13   4  227.29   25.19
   0 -13  -4  203.42   25.59
   0 -13  -4  274.52   31.85
   0  13  -4  246.80   28.25
   0 -13   4  218.44   26.31
   1  13   4   3.288  11.311
   1  13   4   1.428  12.734
  -1 -13  -4  10.111  13.065
  -1 -13  -4  -12.07   12.34
  -1  13  -4   3.157  13.578
  -1  13  -4   9.518  14.297
   1 -13   4   2.768  14.002
   1 -13   4   1.875  13.797
   2  13   4  21.690  15.465
   2  13   4  -0.427  14.117
  -2 -13  -4  -0.673  15.401
  -2 -13  -4  -18.11   14.98
  -2  13  -4  25.886  16.043
  -2  13  -4  -3.003  17.711
   2 -13   4  11.078  15.452
   2 -13   4  23.037  15.311
   2  14  -4  26.387  14.374
   2  14  -4  23.307  12.246
  -2 -14   4  44.688  17.595
  -2 -14   4  25.116  14.733
  -2  14   4  48.166  12.725
   2 -14  -4  3.3741  7.9841
   1  14  -4 1339.87  134.24
   1  14  -4 1109.76  111.84
  -1 -14   4 1031.34  104.62
  -1 -14   4 1002.08  102.24
  -1  14   4 1035.45  104.47
  -1  14   4 1217.57  121.49
   1 -14  -4  960.24   96.56
   1 -14  -4 1043.92  104.97
   0  14   4 1454.10  145.41
   0  14   4 1161.87  116.34
   0 -14  -4 1613.24  160.94
   0 -14  -4 1288.54  129.11
   0  14  -4 1459.23  146.31
   0  14  -4 1130.17  113.81
   0 -14   4 1112.71  112.35
   0 -14   4 1336.02  134.76
   1  14   4  139.51   20.48
   1  14   4  142.59   20.21
  -1 -14  -4  138.22   20.65
  -1 -14  -4  141.56   22.99
  -1  14  -4  110.99   24.63
   1 -14   4  88.131  23.204
   1 -14   4  121.64   21.34
   2  14   4   8.032  16.197
  -2 -14  -4   1.222  17.377
  -2  14  -4   9.523  16.453
  -2  14  -4  -11.16   15.89
   2 -14   4  21.895  15.901
   2 -14   4   3.627  16.325
   2  15  -4  62.425  16.633
   2  15  -4  38.733  12.231
  -2 -15   4  58.421  17.968
  -2 -15   4  56.945  18.070
  -2  15   4  40.864  14.656
   2 -15  -4  39.798  11.793
   1  15  -4  26.785  14.105
   1  15  -4  23.512  13.617
  -1 -15   4  29.980  16.274
  -1 -15   4  15.388  15.722
  -1  15   4  6.3978  8.8940
  -1  15   4  -12.20   16.35
   1 -15  -4  11.246  14.143
   1 -15  -4  -1.889  11.997
   0  15   4  51.798  13.360
   0  15   4  44.611  13.245
   0 -15  -4  41.390  13.668
   0 -15  -4  75.053  15.863
   0  15  -4  52.042  14.926
   0  15  -4  67.392  20.124
   0 -15   4  70.818  15.799
   0 -15   4  62.502  21.754
   1  15   4  590.62   61.56
   1  15   4  598.71   62.01
  -1 -15  -4  703.43   72.64
  -1 -15  -4  687.26   71.31
  -1  15  -4  532.23   57.36
  -1  15  -4  531.84   57.46
   1 -15   4  551.74   59.36
   2  15   4  32.573  19.046
   2  15   4  69.843  20.842
  -2 -15  -4  70.369  21.754
  -2  15  -4  29.993  17.647
  -2  15  -4  18.391  15.927
   2 -15   4  38.258  18.686
   2 -15   4  34.575  16.286
   1  16  -4  221.26   27.55
   1  16  -4  219.85   28.56
  -1 -16   4  272.08   34.45
  -1 -16   4  238.33   30.74
  -1  16   4  174.41   22.07
  -1  16   4  148.62   19.69
   1 -16  -4  217.67   27.80
   0  16   4  182.24   22.56
   0  16   4  225.11   27.17
   0 -16  -4  217.41   27.11
   0 -16  -4  272.47   31.28
   0  16  -4  217.92   27.45
   0  16  -4  249.49   29.74
   0 -16   4  292.62   34.37
   0 -16   4  195.98   26.03
   1  16   4  23.974  13.874
   1  16   4  12.491  14.875
  -1 -16  -4  41.249  15.978
  -1 -16  -4  44.893  16.607
  -1  16  -4  39.067  17.223
  -1  16  -4  27.760  15.311
   1 -16   4  26.708  17.621
   1 -16   4  20.740  15.683
   1  17  -4   4.260  15.337
   1  17  -4  30.250  24.449
  -1 -17   4  26.566  20.932
  -1 -17   4  40.055  19.315
  -1  17   4  12.477  12.301
  -1  17   4  10.947  12.087
   1 -17  -4  13.874  14.413
   1 -17  -4  18.558  13.899
   0  17   4   2.723  12.435
   0  17   4  12.642  10.701
   0 -17  -4   5.945  13.206
   0 -17  -4   8.734  14.130
   0  17  -4   4.198  19.315
   0  17  -4  -1.982  15.298
   0 -17   4  13.784  15.452
   0 -17   4  -9.694  16.171
   1  17   4  63.233  16.954
   1  17   4  68.174  16.646
  -1 -17  -4  65.017  19.752
  -1 -17  -4  54.172  15.863
  -1  17  -4  66.544  19.444
  -1  17  -4  63.554  22.729
   1 -17   4  78.262  24.436
   1 -17   4  37.321  19.906
   0  18   4  417.62   44.33
   0  18   4  531.84   56.56
   0 -18  -4  531.59   57.15
   0 -18  -4  492.70   52.39
   0  18  -4  377.19   44.56
   0  18  -4  434.18   46.36
   0 -18   4  549.43   58.33
  -2   0   5  12.334   3.337
  -2   0   5  11.651   3.563
   2   0  -5  11.692   3.164
   2   0  -5  14.207   3.777
  -1   0   5  4.1261  6.5710
  -1   0   5  3.0789  6.9214
   1   0  -5  2.5938  7.1229
   1   0  -5  1.2162  4.5612
   0   0  -5  6.5774  9.4459
   0   0  -5  9.2841  9.4510
   0   0   5  8.4589  9.8334
   0   0   5  10.757   9.959
  -1   0  -5  28.004  10.399
  -1   0  -5  26.605  14.990
   1   0   5  26.412   9.751
   1   0   5  11.122  10.206
  -2   0  -5  44.701  10.555
   2   0   5  38.425  10.891
   2   0   5  50.014  11.460
  -3   0  -5  103.56   22.07
  -3   0  -5  102.18   17.34
   3   0   5  84.705  15.542
   3   0   5  103.81   19.70
   2   1  -5 1181.24  117.19
   2   1  -5 1252.99  124.28
  -2  -1   5 1360.41  135.01
  -2  -1   5 1276.73  126.71
   1   1  -5  574.07   57.57
   1   1  -5  665.70   66.61
  -1  -1   5  647.09   64.84
  -1  -1   5  616.93   61.92
  -1   1   5  652.35   64.94
  -1   1   5  625.66   62.33
   1  -1  -5  748.48   74.46
   1  -1  -5  682.90   67.94
   0   1   5  745.53   75.12
   0   1   5  833.70   83.74
   0  -1  -5  792.76   79.73
   0  -1  -5  896.97   89.90
   0   1  -5  791.22   79.74
   0   1  -5  772.99   77.99
   0  -1   5  734.88   74.36
   0  -1   5  852.44   85.82
   1   1   5  43.982  11.615
   1   1   5  28.055  10.470
  -1  -1  -5  30.930  11.012
  -1  -1  -5  40.235  10.378
  -1   1  -5  28.543  10.627
  -1   1  -5  37.334  11.384
   1  -1   5  21.895   9.773
   1  -1   5  22.742  10.823
   2   1   5  206.24   23.65
   2   1   5  216.90   24.89
  -2  -1  -5  205.09   24.05
  -2  -1  -5  193.92   22.64
  -2   1  -5  226.01   27.21
  -2   1  -5  181.47   21.33
   2  -1   5  230.24   26.00
   2  -1   5  218.31   25.76
   3   1   5  305.07   34.14
   3   1   5  299.80   33.37
  -3  -1  -5  296.47   32.75
  -3  -1  -5  273.88   31.33
  -3   1  -5  305.71   33.82
  -3   1  -5  312.12   35.37
   3  -1   5  347.93   38.48
   3  -1   5  332.27   36.36
   3   2  -5  69.073   9.778
  -3  -2   5  68.636   9.070
   2   2  -5  65.338   8.404
   2   2  -5  81.034  11.302
  -2  -2   5  67.071   8.980
  -2  -2   5  69.432  10.605
   1   2  -5  7.3578  6.5325
   1   2  -5  11.793   7.014
  -1  -2   5  12.372   7.467
  -1  -2   5  3.1957  6.5864
  -1   2   5  11.614   4.256
  -1   2   5  10.693   4.859
   1  -2  -5  20.907   4.081
   1  -2  -5  14.810   3.370
   0   2   5  94.882  13.771
   0   2   5  90.608  13.258
   0  -2  -5  91.725  13.258
   0  -2  -5  75.657  12.204
   0   2  -5  84.897  14.143
   0   2  -5  84.679  14.002
   0  -2   5  54.352  12.264
   0  -2   5  74.681  14.002
   1   2   5  871.69   87.72
   1   2   5  860.01   86.66
  -1  -2  -5  824.72   83.14
  -1  -2  -5  848.07   85.41
  -1   2  -5  897.36   90.30
  -1   2  -5  879.39   88.53
   1  -2   5  851.03   85.65
   1  -2   5  842.81   85.06
   2   2   5  301.60   34.00
   2   2   5  345.49   37.09
  -2  -2  -5  318.16   34.66
  -2  -2  -5  269.39   29.72
  -2   2  -5  306.61   34.46
  -2   2  -5  260.40   28.67
   2  -2   5  286.71   31.11
   3   2   5  483.71   50.78
   3   2   5  462.80   48.72
  -3  -2  -5  456.38   47.92
  -3  -2  -5  441.88   47.20
  -3   2  -5  586.00   61.54
  -3   2  -5  579.07   60.01
   3  -2   5  596.40   61.72
   3  -2   5  623.22   64.79
   3   3  -5  55.379  14.194
   3   3  -5  48.962   9.493
  -3  -3   5  35.602   7.735
   2   3  -5  372.32   38.32
  -2  -3   5  370.01   38.41
  -2  -3   5  366.03   37.73
   1   3  -5  743.99   75.08
   1   3  -5  735.65   74.03
  -1  -3   5  638.62   64.98
  -1  -3   5  761.44   76.57
  -1   3   5  766.83   76.08
  -1   3   5  718.32   71.37
   1  -3  -5  839.47   83.25
   1  -3  -5  871.05   86.33
   0   3   5  105.97   14.07
   0   3   5  98.078  13.604
   0  -3  -5  93.560  12.873
   0  -3  -5  122.09   15.36
   0   3  -5  79.533  13.809
   0   3  -5  94.600  14.990
   0  -3   5  88.786  14.695
   0  -3   5  86.399  14.605
   1   3   5  429.94   44.87
   1   3   5  399.01   41.98
  -1  -3  -5  353.06   37.40
  -1  -3  -5  340.23   36.00
  -1   3  -5  370.01   40.18
  -1   3  -5  407.35   42.76
   1  -3   5  324.06   35.17
   1  -3   5  373.73   39.63
   2   3   5  20.368  10.788
   2   3   5  24.115  11.615
  -2  -3  -5  14.592   9.699
  -2  -3  -5  25.822  10.610
  -2   3  -5  32.457  12.141
  -2   3  -5  14.284  10.054
   2  -3   5  31.212  11.040
   2  -3   5  23.884  13.540
   3   3   5  12.090  15.170
   3   3   5  18.109  11.761
  -3  -3  -5  20.034  12.536
  -3  -3  -5  26.387  13.501
  -3   3  -5  19.020  14.348
   3  -3   5  26.400  12.911
   3  -3   5  17.185  15.889
   3   4  -5  3.9709  7.9160
  -3  -4   5  0.3565  7.2050
   2   4  -5  16.286   7.104
   2   4  -5  17.249   6.885
  -2  -4   5  19.187   7.974
  -2  -4   5  25.334   7.839
   1   4  -5  286.20   30.57
   1   4  -5  367.18   38.32
  -1  -4   5  300.96   32.29
  -1   4   5  398.88   39.86
  -1   4   5  404.91   40.56
   1  -4  -5  356.40   35.76
   1  -4  -5  339.97   34.01
   0   4   5  426.60   43.88
   0   4   5  447.91   45.92
   0  -4  -5  384.89   39.61
   0  -4  -5  383.74   39.71
   0   4  -5  386.05   40.71
   0   4  -5  423.27   44.30
   0  -4   5  388.49   41.21
   0  -4   5  367.31   39.13
   1   4   5  254.63   29.93
   1   4   5  283.50   30.66
  -1  -4  -5  261.69   30.52
  -1  -4  -5  246.67   27.21
  -1   4  -5  338.95   36.36
  -1   4  -5  351.27   37.67
   1  -4   5  257.96   28.63
   1  -4   5  312.64   34.06
   2   4   5   1.509  10.423
   2   4   5  13.514   9.981
  -2  -4  -5  0.8105  9.4895
  -2  -4  -5  1.9187  9.8245
  -2   4  -5  12.950   9.654
  -2   4  -5  0.6909  9.8655
   2  -4   5  14.092  10.822
   2  -4   5  1.5773  9.8745
   3   4   5  59.280  13.899
   3   4   5  54.288  14.194
  -3  -4  -5  62.681  14.695
  -3  -4  -5  59.781  12.522
  -3   4  -5  29.454  15.131
  -3   4  -5  53.518  12.911
   3  -4   5  39.555  13.566
   3  -4   5  41.505  13.604
   3   5  -5  5.0284  9.8950
   3   5  -5  0.8645  9.1083
  -3  -5   5  8.3126  9.1815
   2   5  -5  68.893  10.770
   2   5  -5  84.230  13.039
  -2  -5   5  95.768  13.270
  -2  -5   5  99.733  13.874
   1   5  -5  505.40   51.86
   1   5  -5  502.58   51.70
  -1  -5   5  567.78   59.19
  -1   5   5  578.94   57.66
  -1   5   5  605.89   60.31
   1  -5  -5  584.21   58.18
   1  -5  -5  717.29   71.56
   0   5   5 1119.38  111.73
   0   5   5 1332.17  133.22
   0  -5  -5 1203.06  120.18
   0  -5  -5  927.13   92.87
   0   5  -5  985.78   99.22
   0   5  -5 1024.41  103.72
   0  -5   5 1011.58  102.35
   0  -5   5  976.80   98.32
   1   5   5  270.80   29.90
   1   5   5  245.13   27.40
  -1  -5  -5  215.23   24.73
  -1  -5  -5  223.70   25.53
  -1   5  -5  238.07   29.49
  -1   5  -5  248.85   29.86
   1  -5   5  243.72   28.90
   1  -5   5  249.88   28.23
   2   5   5  55.353  11.631
   2   5   5  52.645  11.630
  -2  -5  -5  48.885  11.646
  -2  -5  -5  49.668  11.504
  -2   5  -5  62.219  13.027
   2  -5   5  54.172  11.868
   3   5   5  123.40   19.62
   3   5   5  115.58   21.56
  -3  -5  -5  126.42   17.98
  -3  -5  -5  98.719  17.172
  -3   5  -5  118.96   20.71
  -3   5  -5  142.59   19.30
   3  -5   5  159.40   22.33
   3  -5   5  141.30   19.87
   3   6  -5  1.1205  9.3111
   3   6  -5   6.465  13.412
  -3  -6   5  15.093  10.557
  -3  -6   5   0.053  10.737
   2   6  -5  32.829  12.142
   2   6  -5  36.757  10.895
  -2  -6   5  44.046  13.745
  -2  -6   5  40.966  10.530
   1   6  -5  238.07   26.73
   1   6  -5  205.73   23.60
  -1  -6   5  228.32   26.34
  -1  -6   5  252.83   28.31
  -1   6   5  242.18   24.72
  -1   6   5  268.23   27.50
   1  -6  -5  240.12   24.74
   1  -6  -5  243.85   24.85
   0   6   5 1753.13  174.29
   0   6   5 2038.05  202.14
   0  -6  -5 1509.28  150.29
   0  -6  -5 1546.50  153.88
   0   6  -5 1674.84  166.84
   0   6  -5 1592.70  158.89
   0  -6   5 1646.61  164.15
   0  -6   5 1830.13  182.37
   1   6   5  131.93   17.47
   1   6   5  144.13   18.34
  -1  -6  -5  133.47   17.42
  -1  -6  -5  113.68   16.06
  -1   6  -5  99.605  15.465
   1  -6   5  82.754  16.594
   1  -6   5  85.847  15.388
   2   6   5  5.6341  9.6910
   2   6   5   4.116  13.566
  -2  -6  -5  12.319  12.860
  -2  -6  -5   4.099  10.102
  -2   6  -5   3.321  12.423
   2  -6   5   0.028  10.634
   2  -6   5  -9.296  14.130
   3   6   5  15.504  12.337
   3   6   5  -1.371  14.708
  -3  -6  -5   4.824  12.822
  -3  -6  -5  14.182  11.866
  -3   6  -5   2.101  11.176
  -3   6  -5  10.584  15.234
   3  -6   5  24.616  16.607
   3  -6   5   6.477  14.464
   3   7  -5  -9.080  14.579
   3   7  -5   7.362  15.041
  -3  -7   5  -7.833  11.796
  -3  -7   5  -8.409  11.597
   2   7  -5  12.821  12.479
  -2  -7   5  14.810  12.305
  -2  -7   5   7.591  10.357
   1   7  -5  430.45   44.96
   1   7  -5  391.95   41.22
  -1  -7   5  340.10   36.67
  -1  -7   5  385.15   41.07
  -1   7   5  292.23   29.81
  -1   7   5  312.51   31.82
   1  -7  -5  286.58   29.11
   1  -7  -5  317.77   32.56
   0   7   5 1593.99  158.50
   0   7   5 1635.06  162.74
   0  -7  -5 1251.58  124.76
   0  -7  -5 1502.87  150.16
   0   7  -5 1375.81  137.58
   0   7  -5 1525.97  152.47
   0  -7   5 1282.25  128.73
   0  -7   5 1615.81  161.32
   1   7   5 1263.90  127.08
   1   7   5 1158.27  115.97
  -1  -7  -5 1102.70  111.13
  -1  -7  -5 1110.02  111.31
  -1   7  -5 1296.24  130.01
  -1   7  -5 1353.99  135.53
   1  -7   5  900.31   91.22
   1  -7   5 1132.35  113.83
   2   7   5  27.349  10.328
   2   7   5  28.504  11.049
  -2  -7  -5  21.664  10.240
  -2  -7  -5  14.939  11.706
  -2   7  -5  28.671  12.911
  -2   7  -5  14.669  15.889
   2  -7   5  24.808  12.215
   2  -7   5   2.078  16.004
   3   7   5  37.398  14.695
   3   7   5  33.266  15.157
  -3  -7  -5  42.019  15.054
  -3  -7  -5  50.091  14.592
  -3   7  -5  17.146  11.452
  -3   7  -5  24.937  15.054
   3  -7   5  25.245  12.962
   3  -7   5   4.811  14.143
   3   8  -5  -16.68   15.22
   3   8  -5  -10.37   12.61
  -3  -8   5  -11.00   16.34
  -3  -8   5   7.385  16.274
   2   8  -5  191.36   24.27
   2   8  -5  208.17   24.08
  -2  -8   5  233.45   27.21
  -2  -8   5  172.49   21.46
   1   8  -5  495.65   52.56
   1   8  -5  584.46   60.00
  -1  -8   5  373.73   40.23
  -1  -8   5  407.48   42.85
  -1   8   5  467.80   47.15
  -1   8   5  512.21   51.57
   1  -8  -5  396.06   39.99
   1  -8  -5  498.47   50.25
   0   8   5  227.55   25.26
   0   8   5  323.93   34.20
   0  -8  -5  255.53   27.55
   0  -8  -5  220.23   24.53
   0   8  -5  320.72   36.17
   0   8  -5  238.33   27.49
   0  -8   5  224.60   28.59
   0  -8   5  253.22   29.16
   1   8   5  121.37   17.29
   1   8   5  144.77   19.88
  -1  -8  -5  106.83   15.53
  -1  -8  -5  110.89   16.16
  -1   8  -5  91.866  15.940
  -1   8  -5  102.31   17.47
   1  -8   5  90.518  16.864
   1  -8   5  82.626  15.041
   2   8   5  86.745  14.502
   2   8   5  76.311  14.194
  -2  -8  -5  96.769  15.234
  -2  -8  -5  86.617  15.260
  -2   8  -5  70.356  14.964
  -2   8  -5  59.550  16.659
   2  -8   5  81.689  15.247
   2  -8   5  66.814  15.054
   3   8   5  97.783  18.725
   3   8   5  84.730  18.366
  -3  -8  -5  84.114  16.967
  -3  -8  -5  74.296  17.814
  -3   8  -5  40.568  16.068
  -3   8  -5  36.795  17.634
   3  -8   5  49.758  15.619
   3   9  -5  51.041  14.785
   3   9  -5  38.130  17.672
  -3  -9   5  -7.794  18.699
  -3  -9   5  52.620  16.838
   2   9  -5  427.25   44.75
   2   9  -5  444.57   46.72
  -2  -9   5  492.57   52.98
   1   9  -5  64.799  12.975
   1   9  -5  57.728  15.619
  -1  -9   5  50.656  18.212
  -1  -9   5  56.919  12.988
  -1   9   5  73.039   9.563
  -1   9   5  60.718   8.370
   1  -9  -5  46.023   7.493
   1  -9  -5  48.025   7.847
   0   9   5  -3.523   8.200
   0   9   5 -0.7183  8.5757
   0  -9  -5  -1.080   8.218
   0  -9  -5  5.1593  8.3639
   0   9  -5   5.306  10.761
   0   9  -5  -8.201   9.851
   0  -9   5   4.631  11.100
   0  -9   5   8.517  11.578
   1   9   5  18.083  10.914
   1   9   5  19.508  15.388
  -1  -9  -5  10.380  10.399
  -1  -9  -5  24.885  14.040
  -1   9  -5  24.667  12.426
  -1   9  -5  23.371  13.514
   1  -9   5  26.451  13.206
   1  -9   5  22.601  12.197
   2   9   5  21.202  12.532
   2   9   5  15.837  11.570
  -2  -9  -5  13.168  12.885
  -2  -9  -5  13.142  12.145
  -2   9  -5   2.299  12.160
  -2   9  -5   6.441  14.849
   2  -9   5   5.280  12.829
   2  -9   5  14.759  12.713
   3   9   5  -15.77   15.20
   3   9   5  -2.648  13.630
  -3  -9  -5   1.220  16.299
  -3  -9  -5  -2.591  16.684
  -3   9  -5  12.763  18.057
  -3   9  -5   3.030  14.002
   3  -9   5  -14.00   15.98
   3  -9   5  28.646  15.568
   3  10  -5  205.09   25.98
   3  10  -5  195.59   29.98
  -3 -10   5  230.76   30.87
   2  10  -5  180.83   22.84
   2  10  -5  191.23   22.97
  -2 -10   5  179.93   25.48
   1  10  -5   3.917  10.285
   1  10  -5  11.082  14.220
  -1 -10   5  -8.687  17.980
  -1 -10   5  -8.713  11.017
  -1  10   5  1.8776  5.4583
  -1  10   5  -5.125   5.404
   1 -10  -5   9.335  10.728
   1 -10  -5  2.8928  6.4042
   0  10   5 1001.57  100.35
   0  10   5 1022.74  102.52
   0 -10  -5  910.83   91.44
   0 -10  -5  876.56   88.29
   0  10  -5  873.36   88.27
   0  10  -5  918.79   93.03
   0 -10   5  940.22   95.38
   0 -10   5 1168.15  117.44
   1  10   5  101.18   15.32
   1  10   5  95.177  14.810
  -1 -10  -5  111.53   16.34
  -1 -10  -5  87.528  14.425
  -1  10  -5  124.57   23.02
  -1  10  -5  102.22   17.61
   1 -10   5  71.203  15.118
   1 -10   5  77.838  15.606
   2  10   5  285.17   32.47
   2  10   5  296.59   33.24
  -2 -10  -5  312.51   35.18
  -2 -10  -5  301.73   34.55
  -2  10  -5  271.57   33.78
  -2  10  -5  216.25   27.03
   2 -10   5  185.20   24.59
   2 -10   5  222.16   27.77
   2  11  -5  -4.003  16.992
   2  11  -5   2.885  11.583
  -2 -11   5  -1.473  20.855
  -2 -11   5  -2.089  15.157
   1  11  -5  19.970  14.451
   1  11  -5  23.781  15.901
  -1 -11   5  35.550  20.611
  -1 -11   5  -11.33   16.31
  -1  11   5  14.772   7.586
  -1  11   5  19.302   6.576
   1 -11  -5  24.179   9.516
   1 -11  -5  16.081   7.105
   0  11   5  120.33   17.31
   0  11   5  153.62   18.87
   0 -11  -5  125.11   16.24
   0 -11  -5  146.05   17.97
   0  11  -5  133.73   19.07
   0  11  -5  127.79   17.97
   0 -11   5  130.27   19.15
   0 -11   5  105.91   17.17
   1  11   5  31.405  11.261
   1  11   5  29.544  10.725
  -1 -11  -5  41.659  12.574
  -1 -11  -5  27.324  11.960
  -1  11  -5  24.462  13.412
  -1  11  -5  13.745  12.553
   1 -11   5  15.324  12.627
   1 -11   5  17.262  13.296
   2  11   5  158.50   21.25
   2  11   5  159.53   21.56
  -2 -11  -5  151.83   22.10
  -2 -11  -5  143.23   20.56
  -2  11  -5  94.728  20.637
  -2  11  -5  158.24   22.82
   2 -11   5  107.59   19.25
   2  12  -5  25.642  20.278
   2  12  -5  23.217  13.181
  -2 -12   5  37.475  16.684
  -2 -12   5  46.523  17.621
  -2  12   5  13.630   6.861
   1  12  -5  30.263  12.416
   1  12  -5  50.258  17.416
  -1 -12   5  38.271  16.838
  -1 -12   5  57.496  14.413
  -1  12   5  43.430   8.182
  -1  12   5  41.313   8.465
   1 -12  -5  21.779   7.459
   0  12   5  8.3498  9.6833
   0  12   5  19.931   8.832
   0 -12  -5  2.8312  9.3637
   0 -12  -5  12.038   9.790
   0  12  -5  18.982  12.081
   0  12  -5  11.005  11.299
   0 -12   5  16.107  12.924
   0 -12   5  17.595  12.274
   1  12   5  -5.991  10.924
   1  12   5  -1.775  10.652
  -1 -12  -5  -2.840  11.625
  -1 -12  -5   3.051  11.633
  -1  12  -5   0.316  14.336
  -1  12  -5   7.170  20.060
   1 -12   5   8.282  14.130
   1 -12   5   2.299  13.848
   2  12   5  -15.90   18.94
   2  12   5  19.816  19.097
  -2 -12  -5   9.776  14.810
  -2 -12  -5   8.213  19.379
  -2  12  -5  -15.47   14.14
  -2  12  -5  13.848  15.054
   2 -12   5  -2.125  13.219
   2 -12   5  17.044  15.491
   2  13  -5  130.78   21.46
   2  13  -5  141.05   19.52
  -2 -13   5  82.484  19.007
  -2 -13   5  162.35   25.68
  -2  13   5  112.82   15.36
   1  13  -5  71.126  15.593
   1  13  -5  66.737  14.733
  -1 -13   5  85.526  17.672
  -1 -13   5  87.682  17.352
  -1  13   5  42.237  10.720
  -1  13   5  73.321  11.997
   1 -13  -5  72.166  11.363
   1 -13  -5  92.739  16.197
   0  13   5  232.55   26.09
   0  13   5  261.17   29.34
   0 -13  -5  240.77   27.49
   0 -13  -5  233.45   26.46
   0  13  -5  273.11   32.05
   0  13  -5  216.38   25.89
   0 -13   5  201.49   25.96
   0 -13   5  232.81   28.53
   1  13   5  412.36   44.55
   1  13   5  427.25   45.54
  -1 -13  -5  373.09   40.86
  -1 -13  -5  424.42   45.42
  -1  13  -5  436.87   48.17
  -1  13  -5  440.59   48.14
   1 -13   5  309.81   35.96
   2  13   5  22.267  15.709
   2  13   5  -8.752  15.465
  -2 -13  -5   1.926  16.928
  -2 -13  -5   9.371  19.379
  -2  13  -5  -1.430  16.299
  -2  13  -5  17.082  22.395
   2 -13   5  23.679  22.383
   2 -13   5  -2.821  15.452
   2  14  -5  28.209  12.988
   2  14  -5  28.132  15.914
  -2 -14   5  -1.762  24.783
  -2 -14   5  23.384  15.632
  -2  14   5  14.708   9.672
   2 -14  -5  -2.003  10.596
   1  14  -5  -3.248  12.402
   1  14  -5  -11.03   12.96
  -1 -14   5   7.685  14.721
  -1 -14   5  -8.128  14.964
  -1  14   5  0.4728  8.0880
  -1  14   5  3.4665  9.7616
   1 -14  -5   1.146  10.397
   1 -14  -5  1.5362  8.8106
   0 -14  -5  92.572  14.785
   0 -14  -5  109.38   20.48
   0  14  -5  83.331  17.839
   0  14  -5  90.891  16.594
   0 -14   5  109.72   18.65
   0 -14   5  62.874  16.607
   1  14   5  48.757  13.450
   1  14   5  57.984  14.336
  -1 -14  -5  56.778  15.183
  -1 -14  -5  48.526  14.579
  -1  14  -5  26.361  17.557
  -1  14  -5  54.493  18.571
   1 -14   5  45.510  21.998
   1 -14   5  29.185  16.851
   2  14   5  48.667  16.338
   2  14   5  52.260  18.905
  -2 -14  -5  45.766  18.879
  -2 -14  -5  60.705  17.608
  -2  14  -5   6.984  21.061
  -2  14  -5  21.189  18.751
   2 -14   5  20.522  16.402
   2 -14   5  25.065  23.730
   2  15  -5  32.419  15.914
   2  15  -5  21.561  12.241
  -2 -15   5  45.702  18.725
  -2 -15   5  28.042  16.838
  -2  15   5  14.246  13.527
  -2  15   5  17.429  15.311
   2 -15  -5  -7.848  14.297
   1  15  -5  259.12   30.87
   1  15  -5  240.12   28.56
  -1 -15   5  167.23   24.17
  -1 -15   5  273.62   32.80
  -1  15   5  206.11   25.08
  -1  15   5  233.58   27.13
   1 -15  -5  220.10   28.12
   1 -15  -5  219.08   24.87
   0  15   5 1012.48  101.77
   0  15   5 1026.47  103.90
   0 -15  -5  936.24   94.72
   0 -15  -5 1130.55  113.90
   0  15  -5  874.77   89.13
   0  15  -5 1089.87  110.14
   0 -15   5 1157.89  117.06
   0 -15   5 1070.62  108.88
   1  15   5  165.43   22.01
   1  15   5  141.56   20.48
  -1 -15  -5  153.88   22.63
  -1 -15  -5  161.97   22.63
  -1  15  -5  140.92   27.81
  -1  15  -5  135.40   28.98
   1 -15   5  131.81   27.61
   1 -15   5  83.139  30.404
   1  16  -5  29.505  17.672
   1  16  -5  60.204  15.837
  -1 -16   5  54.635  17.955
  -1  16   5  41.441  11.046
  -1  16   5  46.652  13.258
   1 -16  -5  37.527  12.522
   1 -16  -5   9.577  10.951
   0  16   5  65.903  14.515
   0  16   5  77.992  14.823
   0 -16  -5  88.619  15.722
   0 -16  -5  86.694  17.031
   0  16  -5  100.02   21.98
   0  16  -5  100.45   18.51
   0 -16   5  86.270  18.982
   0 -16   5  86.296  25.989
   1  16   5  63.798  15.824
   1  16   5  63.297  16.299
  -1 -16  -5  78.044  18.892
  -1 -16  -5  81.470  17.069
  -1  16  -5  65.377  26.939
  -1  16  -5  27.580  17.621
   1 -16   5  59.563  17.159
   1 -16   5  81.406  31.058
   1  17  -5  -2.034  15.670
   1  17  -5  -17.18   19.51
  -1 -17   5  -15.04   20.33
  -1 -17   5  -14.71   18.99
  -1  17   5  -3.741  12.911
  -1  17   5   4.650  16.094
   1 -17  -5   4.741  11.323
   1 -17  -5   1.446  19.970
   0  17   5  78.929  14.528
   0  17   5  78.891  16.376
   0 -17  -5  81.098  16.582
   0 -17  -5  69.483  14.451
   0  17  -5  70.767  18.468
   0  17  -5  66.557  17.082
   0 -17   5  109.18   21.52
   0 -17   5  121.37   21.74
   1  17   5  47.986  15.491
   1  17   5  74.681  16.184
  -1 -17  -5  47.229  14.451
  -1 -17  -5  76.760  19.136
  -1  17  -5  32.791  19.662
  -1  17  -5  61.680  20.881
   1 -17   5  67.802  30.802
   1 -17   5  75.220  20.445
   0  18   5  25.732  17.980
   0  18   5   7.970  12.561
   0 -18  -5  10.863  14.066
   0 -18  -5  19.213  16.941
   0  18  -5   2.734  20.265
   0  18  -5  17.275  16.094
   0 -18   5  10.130  18.224
   0 -18   5  -2.890  23.807
  -2   0   6  455.35   45.47
  -2   0   6  626.81   62.58
   2   0  -6  429.94   42.96
   2   0  -6  475.63   47.58
  -1   0   6  101.49   12.12
  -1   0   6  104.91   12.10
   1   0  -6  102.66   12.14
   1   0  -6  100.09   11.76
   0   0  -6 3340.70  330.60
   0   0  -6 3490.86  345.49
   0   0   6 3606.36  356.91
   0   0   6 3181.56  314.95
  -1   0  -6  78.390  13.270
  -1   0  -6  58.831  12.029
   1   0   6  89.838  14.425
   1   0   6  77.941  13.014
  -2   0  -6  195.98   23.10
  -2   0  -6  184.55   21.98
   2   0   6  209.84   24.55
   2   0   6  211.63   24.92
  -3   0  -6  832.67   85.24
  -3   0  -6  812.91   82.66
   3   0   6  877.46   89.71
   3   0   6  893.63   90.78
   2   1  -6  38.707   7.020
   2   1  -6  54.789   8.904
  -2  -1   6  28.581   6.178
  -2  -1   6  46.626   6.792
   1   1  -6  468.83   47.55
  -1  -1   6  536.72   54.30
  -1  -1   6  546.35   55.57
  -1   1   6  566.24   56.68
  -1   1   6  477.81   48.06
   1  -1  -6  659.28   65.90
   1  -1  -6  558.79   56.02
   0   1   6  592.55   61.00
   0   1   6  536.21   54.58
   0  -1  -6  739.75   75.16
   0  -1  -6  566.11   57.56
   0   1  -6  594.60   60.54
   0   1  -6  621.68   63.07
   0  -1   6  478.07   49.31
   0  -1   6  434.18   44.93
   1   1   6  90.698  14.323
   1   1   6  78.634  13.501
  -1  -1  -6  84.859  13.437
  -1  -1  -6  93.265  14.477
  -1   1  -6  77.107  13.437
  -1   1  -6  85.744  14.348
   1  -1   6  74.810  13.732
   1  -1   6  77.967  12.950
   2   1   6   4.360  10.361
   2   1   6  12.346  10.787
  -2  -1  -6  11.563   9.729
  -2  -1  -6  18.443  10.787
  -2   1  -6  5.0258  9.5383
  -2   1  -6  8.2780  9.8180
   2  -1   6  11.501  10.311
   2  -1   6  21.240  11.408
   3   1   6  58.652  18.468
   3   1   6  50.669  17.403
  -3  -1  -6  68.842  20.278
  -3  -1  -6  35.602  12.105
  -3   1  -6  67.571  16.043
  -3   1  -6  81.791  18.917
   3  -1   6  71.165  14.425
   3  -1   6  49.976  15.439
  -3  -2   6  3.0532  7.0292
   2   2  -6  408.25   41.45
   2   2  -6  401.19   40.99
  -2  -2   6  485.77   49.03
  -2  -2   6  417.88   42.40
   1   2  -6  892.35   89.35
   1   2  -6  921.48   92.15
  -1  -2   6  877.59   88.12
  -1  -2   6  978.98   97.81
  -1   2   6  927.52   92.23
  -1   2   6  907.75   90.20
   1  -2  -6  922.90   91.70
   1  -2  -6  999.26   99.30
   0   2   6 4291.70  424.42
   0   2   6 4273.73  422.62
   0  -2  -6 4194.16  414.80
   0  -2  -6 4337.91  428.79
   0   2  -6 4604.85  455.35
   0   2  -6 4081.22  403.89
   0  -2   6 3873.31  383.35
   0  -2   6 4609.99  455.87
   1   2   6  101.99   16.75
   1   2   6  89.209  14.477
  -1  -2  -6  94.382  14.297
  -1  -2  -6  110.39   15.79
  -1   2  -6  117.88   19.21
  -1   2  -6  100.72   15.13
   1  -2   6  85.051  13.809
   2   2   6   7.880  10.421
   2   2   6   3.094  10.244
  -2  -2  -6  3.8104  9.9515
  -2  -2  -6   9.735  10.987
  -2   2  -6  10.212  10.308
  -2   2  -6  7.9481  9.7770
   2  -2   6  11.185  10.782
   2  -2   6  11.374  10.620
   3   2   6  348.83   38.21
   3   2   6  328.94   36.94
  -3  -2  -6  315.20   34.70
  -3  -2  -6  291.20   33.15
  -3   2  -6  319.44   35.52
  -3   2  -6  369.88   41.47
   3  -2   6  362.82   40.44
   3  -2   6  398.11   43.11
   3   3  -6  20.971   8.073
  -3  -3   6  26.258   8.547
   2   3  -6  8.8401  6.1372
   2   3  -6  15.273   7.999
  -2  -3   6  10.064   6.443
  -2  -3   6  8.0803  6.4453
   1   3  -6  885.55   88.86
   1   3  -6  740.52   74.50
  -1  -3   6  852.82   85.74
  -1  -3   6  795.45   80.29
  -1   3   6  889.66   88.31
  -1   3   6  936.50   93.09
   1  -3  -6 1023.64  101.54
   1  -3  -6  860.91   85.45
   0   3   6 1531.10  152.47
   0   3   6 1574.74  156.45
   0  -3  -6 1393.78  138.74
   0  -3  -6 1405.33  139.89
   0   3  -6 1332.17  133.09
   0   3  -6 1159.43  116.64
   0  -3   6 1137.61  114.42
   0  -3   6 1072.03  107.55
   1   3   6  820.35   82.95
   1   3   6  890.04   89.76
  -1  -3  -6  885.68   89.22
  -1  -3  -6  777.74   78.61
  -1   3  -6  908.01   91.61
  -1   3  -6  858.85   86.80
   1  -3   6  809.57   82.05
   1  -3   6  871.43   87.94
   2   3   6  -3.042  13.052
   2   3   6  -2.601  14.785
  -2  -3  -6  7.6311  9.9451
  -2  -3  -6   3.441  13.630
  -2   3  -6   2.673  10.664
  -2   3  -6   9.602  14.220
   2  -3   6   8.109  15.183
   2  -3   6   4.963  11.599
   3   3   6  137.84   19.46
   3   3   6  121.56   18.48
  -3  -3  -6  127.28   17.83
  -3  -3  -6  135.78   19.89
  -3   3  -6  137.58   22.23
  -3   3  -6  150.29   20.84
   3  -3   6  142.46   20.59
   3  -3   6  166.84   22.70
   3   4  -6  68.470  15.260
   3   4  -6  37.809   9.577
  -3  -4   6  54.083   9.540
   2   4  -6  130.01   15.70
   2   4  -6  126.72   15.22
  -2  -4   6  131.68   15.67
  -2  -4   6  155.55   17.94
   1   4  -6 1930.24  191.87
   1   4  -6 2135.58  211.89
  -1  -4   6 2252.37  223.70
  -1  -4   6 1831.42  182.12
  -1   4   6 2103.50  208.17
  -1   4   6 2175.37  215.23
   1  -4  -6 2179.22  215.48
   1  -4  -6 1987.99  196.62
   0   4   6 1038.15  103.81
   0   4   6 1099.88  109.82
   0  -4  -6 1036.61  103.52
   0  -4  -6 1052.90  105.11
   0   4  -6  935.47   94.25
   0   4  -6  902.75   91.02
   0  -4   6  793.40   80.34
   0  -4   6  801.87   81.18
   1   4   6  66.236  12.591
   1   4   6  77.145  13.668
  -1  -4  -6  39.375  10.665
  -1  -4  -6  72.923  12.860
  -1   4  -6  57.034  13.001
  -1   4  -6  37.052  11.060
   1  -4   6  39.080  12.419
   1  -4   6  35.242  10.627
   2   4   6  12.597  11.380
   2   4   6  -4.239  13.758
  -2  -4  -6  -2.553  10.152
  -2   4  -6   9.017  10.903
  -2   4  -6  -9.369  11.341
   2  -4   6  -1.724  11.572
   2  -4   6  10.325  11.549
   3   4   6  15.696  12.885
   3   4   6   5.991  16.479
  -3  -4  -6  14.169  16.004
  -3  -4  -6  24.539  17.878
  -3   4  -6   6.146  12.744
  -3   4  -6  11.857  15.478
   3  -4   6   0.210  14.066
   3   5  -6  -4.924  10.774
   3   5  -6  -4.061  13.399
  -3  -5   6  7.8994  9.5652
   2   5  -6  48.975   9.737
   2   5  -6  56.418  10.552
  -2  -5   6  50.848  10.227
  -2  -5   6  48.282  11.988
   1   5  -6  270.16   29.27
   1   5  -6  250.01   27.75
  -1  -5   6  243.08   27.46
  -1  -5   6  270.80   30.03
  -1   5   6  277.34   28.18
  -1   5   6  290.05   29.63
   1  -5  -6  267.59   27.13
   1  -5  -6  276.70   28.23
   0   5   6 7099.79  701.38
   0   5   6 7104.92  701.89
   0  -5  -6 6496.59  641.83
   0  -5  -6 6846.96  676.35
   0   5  -6 6476.06  640.16
   0   5  -6 6408.04  633.62
   0  -5   6 5776.60  571.11
   0  -5   6 5894.67  582.92
   1   5   6  528.12   54.49
   1   5   6  508.74   52.44
  -1  -5  -6  486.41   50.31
  -1  -5  -6  494.62   50.98
  -1   5  -6  547.50   56.85
  -1   5  -6  498.22   51.77
   1  -5   6  495.27   51.66
   1  -5   6  440.85   46.13
   2   5   6  15.760  10.488
   2   5   6   7.617  11.350
  -2  -5  -6  26.117  10.497
  -2  -5  -6  13.219  10.987
  -2   5  -6  14.759  13.412
  -2   5  -6   8.673  11.667
   2  -5   6  11.590  11.860
   2  -5   6  20.483  12.736
   3   5   6  19.315  13.797
   3   5   6   5.710  12.713
  -3  -5  -6  28.877  14.400
  -3  -5  -6  25.835  12.227
  -3   5  -6  27.568  16.877
  -3   5  -6  32.034  13.527
   3  -5   6  14.862  15.773
   3  -5   6  22.511  13.322
   3   6  -6  -9.687  12.484
   3   6  -6  12.010  10.674
  -3  -6   6   1.385  15.118
   2   6  -6  192.90   22.00
   2   6  -6  201.24   22.65
  -2  -6   6  216.13   24.69
  -2  -6   6  198.67   22.61
   1   6  -6  139.76   18.38
  -1  -6   6  109.91   19.82
  -1  -6   6  141.30   20.51
  -1   6   6  174.16   18.25
  -1   6   6  165.05   17.70
   1  -6  -6  194.44   20.42
   1  -6  -6  165.69   17.40
   0   6   6  42.827  10.272
   0   6   6  38.438   9.600
   0  -6  -6  35.640   9.142
   0  -6  -6  39.888   9.668
   0   6  -6  43.546  12.790
   0  -6   6  35.666  13.399
   0  -6   6  44.996  13.014
   1   6   6  145.15   18.48
   1   6   6  153.75   19.21
  -1  -6  -6  132.45   17.70
  -1  -6  -6  161.20   20.00
  -1   6  -6  138.74   19.38
  -1   6  -6  120.24   17.58
   1  -6   6  112.72   19.74
   1  -6   6  114.31   17.47
   2   6   6  311.61   35.49
   2   6   6  320.98   34.84
  -2  -6  -6  265.92   29.67
  -2   6  -6  263.87   30.43
  -2   6  -6  261.56   34.32
   2  -6   6  265.92   30.46
   2  -6   6  266.18   33.23
   3   6   6   3.723  15.427
   3   6   6  -1.810  13.091
  -3  -6  -6   9.836  12.532
  -3  -6  -6  17.108  14.669
  -3   6  -6  23.538  17.788
  -3   6  -6   1.421  17.583
   3  -6   6  -7.586  16.235
   3  -6   6   1.179  16.171
   3   7  -6  10.938  11.176
   3   7  -6   3.103  11.697
  -3  -7   6  -11.53   11.86
  -3  -7   6  -3.178  10.679
   2   7  -6  67.815  11.946
   2   7  -6  66.917  12.396
  -2  -7   6  53.441  11.880
  -2  -7   6  55.892  12.395
   1   7  -6  8.6039  9.5691
   1   7  -6  19.893  11.368
  -1  -7   6  16.466  10.289
  -1  -7   6   8.782  10.734
  -1   7   6  16.081   4.846
  -1   7   6  12.023   4.695
   1  -7  -6  13.296   4.305
   1  -7  -6  12.203   6.236
   0   7   6 1166.74  116.49
   0   7   6 1065.87  106.59
   0  -7  -6 1102.44  110.28
   0  -7  -6  987.58   98.73
   0   7  -6 1182.27  118.64
   0   7  -6 1068.43  107.49
   0  -7   6  938.55   94.82
   0  -7   6  966.92   97.64
   1   7   6  52.568  11.673
   1   7   6  45.458  11.004
  -1  -7  -6  40.479  11.059
  -1  -7  -6  49.860  11.990
  -1   7  -6  52.812  17.865
  -1   7  -6  44.816  15.696
   1  -7   6  13.797  16.992
   2   7   6  30.738  11.114
   2   7   6  51.696  12.770
  -2  -7  -6  51.580  12.024
  -2  -7  -6  57.894  12.752
  -2   7  -6  31.828  13.258
  -2   7  -6  15.619  20.098
   3   7   6  -0.819  15.619
   3   7   6  -15.57   14.22
  -3  -7  -6   2.705  12.771
  -3  -7  -6   9.196  15.170
  -3   7  -6  -4.197  12.336
  -3   7  -6  -3.496  17.916
   3  -7   6  -14.35   15.75
   3  -7   6   4.529  14.361
   3   8  -6  12.539  17.005
   3   8  -6  10.822  13.514
  -3  -8   6  -9.683  13.142
  -3  -8   6  26.797  12.323
   2   8  -6  8.9761  9.5293
   2   8  -6  26.220  14.502
  -2  -8   6   4.996  11.504
  -2  -8   6  16.145  12.265
   1   8  -6  87.644  14.105
   1   8  -6  65.274  15.170
  -1  -8   6  70.189  13.681
  -1  -8   6  71.216  17.839
  -1   8   6  89.915  10.837
  -1   8   6  80.097   9.855
   1  -8  -6  77.697   9.773
   1  -8  -6  82.497  10.149
   0   8   6  292.10   32.51
   0   8   6  305.32   32.32
   0  -8  -6  304.30   32.21
   0  -8  -6  271.31   29.72
   0   8  -6  351.65   39.64
   0   8  -6  266.95   30.29
   0  -8   6  282.73   31.79
   1   8   6  27.208   9.758
   1   8   6  27.337  11.125
  -1  -8  -6  35.063  10.736
  -1  -8  -6  26.156   9.981
  -1   8  -6  17.660  16.607
  -1   8  -6  24.295  12.616
   1  -8   6  27.426  11.693
   1  -8   6   4.692  14.374
   2   8   6   5.964  15.029
   2   8   6  27.054  17.018
  -2  -8  -6   0.864  16.530
  -2   8  -6   8.101  12.847
  -2   8  -6  -12.52   20.64
   2  -8   6  29.043  14.207
   3   8   6  15.773  14.849
   3   8   6  50.579  17.377
  -3  -8  -6  18.212  16.158
  -3  -8  -6  15.555  15.311
  -3   8  -6  26.387  19.598
  -3   8  -6  30.121  24.718
   3  -8   6  21.279  17.839
   3  -8   6  19.328  15.196
   3   9  -6  17.275  12.235
   3   9  -6  13.078  19.200
  -3  -9   6  18.828  21.215
  -3  -9   6   8.352  14.451
   2   9  -6  24.513  17.082
   2   9  -6  22.241  10.951
  -2  -9   6  34.357  14.066
  -2  -9   6  32.213  16.967
   1   9  -6  111.26   16.29
   1   9  -6  93.907  15.337
  -1  -9   6  121.37   17.43
  -1   9   6  118.02   13.39
  -1   9   6  111.68   13.07
   1  -9  -6  103.30   12.33
   1  -9  -6  112.11   13.31
   0   9   6  246.41   26.59
   0   9   6  279.78   30.31
   0  -9  -6  250.78   27.14
   0  -9  -6  217.15   23.87
   0   9  -6  305.32   33.65
   0   9  -6  260.53   29.72
   0  -9   6  222.16   26.09
   0  -9   6  308.02   34.46
   1   9   6  96.948  14.336
   1   9   6  113.88   16.34
  -1  -9  -6  82.215  13.553
  -1  -9  -6  91.199  14.130
  -1   9  -6  106.16   22.41
  -1   9  -6  76.709  16.004
   1  -9   6  58.677  14.823
   1  -9   6  62.219  18.212
   2   9   6  142.97   19.11
   2   9   6  148.75   20.10
  -2  -9  -6  144.90   21.00
  -2  -9  -6  128.08   19.03
  -2   9  -6  121.67   21.92
  -2   9  -6  99.874  28.671
   2  -9   6  80.161  22.036
   2  -9   6  129.62   25.19
   3  10  -6  38.194  13.335
   3  10  -6  40.620  21.202
  -3 -10   6  30.173  14.849
  -3 -10   6  44.560  17.531
   2  10  -6  59.999  13.463
   2  10  -6  119.92   22.06
  -2 -10   6  83.639  17.749
  -2 -10   6  136.81   24.94
   1  10  -6   8.296  17.980
   1  10  -6  -11.68   10.97
  -1 -10   6  -8.396  14.169
  -1 -10   6  -5.916  11.377
  -1  10   6  6.8277  5.0091
  -1  10   6  7.6953  8.0405
   1 -10  -6  13.052   8.438
   1 -10  -6  18.378   8.343
   0  10   6  4.5907  9.1494
   0  10   6  10.589   8.454
   0 -10  -6  9.6525  8.2638
   0 -10  -6  2.9005  8.3460
   0  10  -6   1.969  12.181
   0  10  -6  12.676  11.674
   0 -10   6   0.337  11.623
   0 -10   6   9.704  12.615
   1  10   6  12.395  11.014
   1  10   6  13.399  10.005
  -1 -10  -6  10.312  10.732
  -1 -10  -6  17.364  10.732
  -1  10  -6   9.763  13.591
  -1  10  -6  12.756  12.950
   1 -10   6   0.839  12.443
   1 -10   6  -0.565  12.223
   2  10   6  26.900  12.762
   2  10   6  37.463  12.826
  -2 -10  -6  31.559  13.771
  -2 -10  -6  25.514  13.694
  -2  10  -6  28.235  14.721
  -2  10  -6  23.281  23.178
   2 -10   6   8.500  14.964
   2 -10   6  23.281  15.157
   2  11  -6 1248.37  125.39
   2  11  -6 1371.96  138.61
  -2 -11   6 1459.23  147.21
  -2 -11   6 1198.06  121.97
   1  11  -6  512.08   53.40
  -1 -11   6  490.65   51.62
  -1 -11   6  459.97   50.34
  -1  11   6  376.68   38.71
   1 -11  -6  423.65   43.44
   1 -11  -6  384.12   39.53
   0  11   6  99.913  14.259
   0  11   6  131.55   16.48
   0 -11  -6  104.46   15.89
   0 -11  -6  105.16   14.57
   0  11  -6  90.839  16.274
   0  11  -6  100.27   16.93
   0 -11   6  135.91   20.11
   0 -11   6  106.24   17.76
   1  11   6   2.164  10.982
   1  11   6  10.428  10.394
  -1 -11  -6  19.405  11.293
  -1 -11  -6  15.606  11.338
  -1  11  -6  -10.11   15.71
  -1  11  -6  -6.939  13.912
   1 -11   6  -5.303  13.501
   1 -11   6   5.353  13.245
   2  11   6  46.113  23.140
   2  11   6  23.088  22.331
  -2 -11  -6  25.758  22.883
  -2 -11  -6  11.893  16.992
  -2  11  -6  10.218  14.810
  -2  11  -6   3.586  18.122
   2 -11   6   5.053  14.952
   2 -11   6  24.256  16.017
   2  12  -6   0.654  17.108
   2  12  -6   8.565  21.292
  -2 -12   6  -16.76   14.78
  -2 -12   6  24.731  26.323
  -2  12   6  0.7648  3.5255
   1  12  -6  23.422  13.027
  -1 -12   6  43.815  20.573
  -1 -12   6  74.245  16.723
  -1  12   6  39.426   8.986
  -1  12   6  47.576   8.523
   1 -12  -6  64.658  12.042
   1 -12  -6  61.167  10.668
   0  12   6  202.52   23.60
   0  12   6  203.42   24.60
   0 -12  -6  216.00   24.89
   0 -12  -6  155.93   19.28
   0  12  -6  199.70   25.26
   0  12  -6  184.43   25.83
   0 -12   6  176.21   23.14
   0 -12   6  167.74   25.66
   1  12   6  11.234  11.726
   1  12   6  15.747  13.232
  -1 -12  -6  14.156  12.186
  -1 -12  -6  11.125  11.863
  -1  12  -6  -0.835  15.504
  -1  12  -6  22.472  17.672
   1 -12   6  17.352  13.412
   1 -12   6   1.571  20.547
   2  12   6  51.028  15.427
   2  12   6  37.527  15.889
  -2 -12  -6  12.511  15.773
  -2 -12  -6  33.805  15.196
  -2  12  -6  31.392  22.331
  -2  12  -6  30.019  17.595
   2 -12   6  22.049  15.221
   2 -12   6  29.826  16.736
   2  13  -6  56.200  14.939
   2  13  -6  91.173  19.700
  -2 -13   6  102.29   19.28
  -2 -13   6  110.18   22.05
  -2  13   6  63.528  10.249
   1  13  -6  236.15   28.07
   1  13  -6  221.39   28.81
  -1 -13   6  210.61   28.63
  -1 -13   6  204.32   27.08
  -1  13   6  161.97   18.31
  -1  13   6  262.84   31.85
   1 -13  -6  211.76   25.44
   1 -13  -6  154.14   18.25
   0 -13  -6  21.792  11.054
   0 -13  -6  11.707   9.848
   0  13  -6  11.095  14.323
   0  13  -6  26.733  18.879
   0 -13   6   3.822  14.823
   0 -13   6   7.561  19.841
   1  13   6  240.77   28.74
   1  13   6  209.19   25.67
  -1 -13  -6  197.52   24.63
  -1 -13  -6  236.66   28.16
  -1  13  -6  141.05   27.82
  -1  13  -6  201.75   28.36
   1 -13   6  186.86   26.71
   2  13   6  27.426  15.555
   2  13   6   8.572  16.979
  -2 -13  -6  17.942  15.593
  -2 -13  -6  28.697  17.570
  -2  13  -6  -4.077  17.056
  -2  13  -6   2.759  15.439
   2 -13   6  11.558  14.964
   2 -13   6   1.576  17.313
   2  14  -6  34.703  16.684
   2  14  -6  50.027  13.784
  -2 -14   6  65.839  21.061
  -2 -14   6  37.899  17.082
  -2  14   6  44.919  11.184
   1  14  -6  217.02   26.91
   1  14  -6  252.83   29.97
  -1 -14   6  255.65   30.76
  -1 -14   6  247.31   30.13
  -1  14   6  205.86   22.82
  -1  14   6  220.62   25.33
   1 -14  -6  209.84   23.73
   1 -14  -6  256.55   29.13
   0  14   6  945.10   95.65
   0  14   6  781.98   79.24
   0 -14  -6  924.44   93.29
   0 -14  -6  948.56   96.04
   0  14  -6  804.31   83.72
   0  14  -6  932.39   95.10
   0 -14   6  701.64   74.07
   0 -14   6  821.64   84.38
   1  14   6  864.63   88.62
   1  14   6  801.23   82.04
  -1 -14  -6  647.22   66.93
  -1  14  -6  735.26   77.09
  -1  14  -6  747.20   78.40
   1 -14   6  858.21   89.12
   1 -14   6  693.68   72.54
   2  14   6  59.909  16.363
   2  14   6  64.530  20.188
  -2 -14  -6  118.07   23.86
  -2 -14  -6  114.94   18.94
  -2  14  -6  59.884  18.160
  -2  14  -6  91.879  23.050
   2 -14   6  38.784  18.905
   2 -14   6  58.613  19.880
   1  15  -6   2.618  19.225
   1  15  -6  -5.096  15.285
  -1 -15   6  -3.818  15.593
  -1 -15   6  23.307  17.621
  -1  15   6  2.8248  9.4985
  -1  15   6 -0.3324  9.9181
   1 -15  -6  10.896  10.093
   1 -15  -6   7.317  10.530
   0  15   6  26.027  12.511
   0  15   6  23.679  14.618
   0 -15  -6  30.507  11.778
   0 -15  -6  24.731  18.443
   0  15  -6  20.727  21.279
   0  15  -6  18.224  15.311
   0 -15   6  12.173  21.946
   0 -15   6  28.453  15.401
   1  15   6  61.321  15.157
   1  15   6  53.762  24.436
  -1 -15  -6  64.491  16.428
  -1 -15  -6  70.215  16.992
  -1  15  -6  37.142  19.495
  -1  15  -6  61.950  19.546
   1 -15   6  29.570  18.224
   1 -15   6  58.100  20.316
   1  16  -6   1.319  18.455
   1  16  -6  -0.703  13.963
  -1 -16   6   7.938  18.789
  -1 -16   6  -1.386  17.352
  -1  16   6   5.294  11.889
  -1  16   6  -2.110  10.737
   1 -16  -6   8.826  12.418
   1 -16  -6  -7.587  11.003
   0  16   6  35.935  11.353
   0  16   6  24.911  12.146
   0 -16  -6  32.213  13.155
   0 -16  -6  10.811  11.357
   0  16  -6  31.572  21.048
   0  16  -6  18.353  15.273
   0 -16   6  60.358  23.217
   0 -16   6  40.543  18.648
   1  16   6  136.30   21.12
  -1 -16  -6  124.02   21.03
  -1 -16  -6  120.04   21.79
  -1  16  -6  104.70   22.33
  -1  16  -6  79.186  21.779
   1 -16   6  97.898  22.485
   1 -16   6  96.178  19.790
   1  17  -6  -1.733  18.661
   1  17  -6   1.769  14.554
  -1 -17   6  12.950  18.930
  -1 -17   6  -14.07   18.83
  -1  17   6   9.790  11.828
  -1  17   6  -25.99   14.21
   1 -17  -6  14.567  15.953
   1 -17  -6  -8.225  11.268
   0  17   6  10.072  13.347
   0  17   6  -9.826  11.961
   0 -17  -6  20.881  14.990
   0 -17  -6  -0.966  12.087
   0  17  -6  -6.824  21.459
   0  17  -6  39.478  19.662
   0 -17   6  -3.184  25.694
   0 -17   6  -4.465  21.330
  -2   0   7  1.6646  3.0032
  -2   0   7  5.1683  3.0250
   2   0  -7  0.3550  5.6495
   2   0  -7  1.3668  4.0017
  -1   0   7  2.4115  5.4635
   1   0  -7  -2.476   5.497
   1   0  -7  2.9608  5.8549
   0   0  -7  16.543  12.616
   0   0  -7  10.797   9.080
   0   0   7  15.414   9.481
  -1   0  -7  5.3556  9.6345
  -1   0  -7   8.956  14.413
   1   0   7  -3.771   9.321
   1   0   7   6.055  14.926
  -2   0  -7  -4.641  10.734
  -2   0  -7   1.991  10.366
   2   0   7  -7.187  15.940
   2   0   7  -0.760  10.818
  -3   0  -7  -0.111  13.707
  -3   0  -7  -2.614  11.889
   3   0   7  12.811  14.156
   3   0   7  -3.247  13.052
   2   1  -7  0.1967  5.5636
   2   1  -7  6.8675  6.0795
  -2  -1   7  1.4862  4.1261
  -2  -1   7  0.0111  4.0710
  -2   1   7  2.2498  1.5978
   1   1  -7 1514.42  150.67
   1   1  -7 1565.75  155.42
  -1  -1   7 1481.05  147.21
  -1  -1   7 1280.97  127.57
  -1   1   7 1483.61  147.21
  -1   1   7 1256.58  124.76
   1  -1  -7 1388.64  137.71
   1  -1  -7 1436.13  142.46
   0   1   7  98.052  13.732
   0   1   7  89.864  13.758
   0  -1  -7  82.369  13.039
   0  -1  -7  81.894  12.847
   0   1  -7  82.857  13.360
   0   1  -7  96.743  14.733
   0  -1   7  76.953  13.412
   0  -1   7  69.881  12.245
   1   1   7  539.03   55.53
  -1  -1  -7  497.32   51.25
  -1   1  -7  481.28   49.94
  -1   1  -7  553.53   56.97
   1  -1   7  472.93   49.40
   1  -1   7  437.00   45.43
   2   1   7   2.278  10.856
   2   1   7   8.965  11.239
  -2  -1  -7   4.733  10.099
  -2  -1  -7  12.223  10.582
  -2   1  -7   6.495  10.181
  -2   1  -7  -0.966  18.173
   2  -1   7  -9.058  16.684
   2  -1   7  13.707  11.837
   3   1   7  23.127  14.451
   3   1   7  27.503  14.464
  -3  -1  -7  25.732  13.784
  -3  -1  -7  27.799  12.873
  -3   1  -7  31.238  20.650
  -3   1  -7  18.122  13.232
   3  -1   7  29.672  14.913
   3  -1   7  18.712  18.468
  -3  -2   7  7.0433  5.2029
   2   2  -7  4.7935  6.1655
   2   2  -7  -3.486   4.738
  -2  -2   7  0.7344  5.0874
  -2  -2   7  3.1315  7.8300
   1   2  -7  10.224  12.138
   1   2  -7  17.108   7.872
  -1  -2   7  20.380  10.143
  -1  -2   7  12.371   9.745
  -1   2   7  19.367   7.676
  -1   2   7  17.570   7.232
   1  -2  -7  14.028   5.828
   1  -2  -7  23.538   5.779
   0   2   7  185.71   21.46
   0   2   7  171.72   20.10
   0  -2  -7  192.00   21.59
   0  -2  -7  221.77   24.42
   0   2  -7  165.82   20.30
   0   2  -7  192.64   22.91
   0  -2   7  179.16   21.47
   0  -2   7  159.66   20.44
   1   2   7  746.17   76.44
   1   2   7  665.44   68.12
  -1  -2  -7  608.46   62.67
  -1  -2  -7  676.74   69.62
  -1   2  -7  600.38   61.44
  -1   2  -7  575.86   59.22
   1  -2   7  565.47   58.05
   1  -2   7  580.87   59.78
   2   2   7  157.99   22.46
   2   2   7  163.76   20.92
  -2  -2  -7  129.11   17.85
  -2   2  -7  166.59   20.93
  -2   2  -7  180.83   25.28
   2  -2   7  184.17   23.37
   2  -2   7  173.90   22.58
   3   2   7  60.731  15.080
   3   2   7  63.310  15.491
  -3  -2  -7  44.496  14.246
  -3  -2  -7  52.581  13.655
  -3   2  -7  58.998  16.556
   3  -2   7  64.183  16.492
   3  -2   7  26.181  18.494
   3   3  -7  0.9201  6.9355
  -3  -3   7  0.1209  9.5601
   2   3  -7  178.14   19.43
   2   3  -7  249.49   27.53
  -2  -3   7  181.34   19.70
  -2  -3   7  226.26   24.37
   1   3  -7 1785.21  177.37
   1   3  -7 1627.36  161.84
  -1  -3   7 1691.53  168.25
  -1  -3   7 1624.79  161.84
  -1   3   7 1801.90  178.39
  -1   3   7 1971.31  195.21
   1  -3  -7 1673.56  165.69
   1  -3  -7 1898.15  188.02
   0   3   7  192.64   22.65
   0   3   7  192.00   23.83
   0  -3  -7  166.59   20.12
   0  -3  -7  185.71   22.46
   0   3  -7  158.24   20.32
   0   3  -7  136.81   18.47
   0  -3   7  134.12   18.22
   0  -3   7  110.40   16.30
   1   3   7  435.33   46.37
  -1  -3  -7  367.95   39.84
  -1   3  -7  351.65   37.64
  -1   3  -7  393.75   41.68
   1  -3   7  354.99   38.23
   1  -3   7  383.99   40.85
   2   3   7   6.308  11.543
   2   3   7   8.367  11.435
  -2  -3  -7   5.059  10.179
  -2  -3  -7  29.120  11.517
  -2   3  -7  21.805  16.222
  -2   3  -7   4.056  17.223
   2  -3   7   3.020  17.826
   2  -3   7  31.392  17.826
   3   3   7  28.094  20.945
  -3  -3  -7  49.296  18.237
  -3   3  -7  42.070  17.236
  -3   3  -7  32.188  14.284
   3  -3   7  11.547  14.297
   3  -3   7  30.006  15.157
   3   4  -7  81.778  15.388
   3   4  -7  39.696   9.665
  -3  -4   7  36.808  11.067
   2   4  -7  90.249  14.528
   2   4  -7  62.912   9.786
  -2  -4   7  86.501  11.719
  -2  -4   7  80.598  11.757
   1   4  -7  14.323  10.045
   1   4  -7  19.302   9.320
  -1  -4   7  21.805  10.448
  -1  -4   7  19.213   9.686
   1  -4  -7  35.589   6.713
   1  -4  -7  29.736   6.226
   0   4   7  425.83   44.01
   0   4   7  446.24   46.00
   0  -4  -7  422.11   43.60
   0  -4  -7  335.23   35.13
   0   4  -7  318.80   36.33
   0   4  -7  347.67   37.35
   0  -4   7  343.44   38.55
   1   4   7  238.20   26.94
   1   4   7  267.97   31.33
  -1  -4  -7  240.25   29.44
  -1  -4  -7  237.04   26.67
  -1   4  -7  226.26   26.14
  -1   4  -7  239.74   27.91
   1  -4   7  195.21   23.52
   1  -4   7  213.82   25.60
   2   4   7  52.414  16.825
   2   4   7  36.885  12.351
  -2  -4  -7  46.138  11.901
  -2  -4  -7  22.537  14.079
  -2   4  -7  66.378  19.880
  -2   4  -7  35.473  12.807
   2  -4   7  33.471  13.604
   2  -4   7  61.449  15.529
   3   4   7  44.714  14.887
   3   4   7  41.993  14.438
  -3  -4  -7  58.780  16.389
  -3  -4  -7  43.649  13.347
  -3   4  -7  33.933  17.711
   3  -4   7  29.595  15.414
   3  -4   7  43.597  15.991
   3   5  -7  -8.374   9.987
   3   5  -7  15.029  11.339
  -3  -5   7  14.541  14.207
   2   5  -7  4.1120  8.0380
   2   5  -7  6.3259  6.7969
  -2  -5   7  5.2555  8.3447
  -2  -5   7  10.903   7.928
   1   5  -7  193.41   22.79
  -1  -5   7  197.64   25.27
  -1   5   7  214.46   22.24
  -1   5   7  241.66   24.95
   1  -5  -7  237.56   24.38
   1  -5  -7  205.73   21.25
   0   5   7  995.92   99.76
   0   5   7 1002.98  100.44
   0  -5  -7  876.18   87.73
   0  -5  -7  894.53   89.61
   0   5  -7  994.12  100.17
   0   5  -7  920.46   93.97
   0  -5   7  825.23   83.56
   0  -5   7  674.69   68.94
   1   5   7  69.612  15.427
   1   5   7  67.379  12.812
  -1  -5  -7  56.611  11.814
  -1  -5  -7  64.311  15.183
  -1   5  -7  50.836  13.745
   1  -5   7  49.629  14.156
   2   5   7  107.88   18.13
   2   5   7  60.371  13.129
  -2  -5  -7  78.146  14.233
  -2  -5  -7  88.850  14.464
  -2   5  -7  77.492  17.749
  -2   5  -7  75.978  15.953
   2  -5   7  77.235  16.530
   2  -5   7  81.599  15.619
   3   5   7  25.411  14.579
   3   5   7   8.132  14.117
  -3  -5  -7   7.116  12.006
  -3  -5  -7  -2.558  15.247
  -3   5  -7  -19.32   19.37
  -3   5  -7   8.600  12.549
   3  -5   7  25.091  15.504
   3  -5   7   0.044  15.555
   3   6  -7   5.082  16.864
   3   6  -7  -9.121  10.150
  -3  -6   7  -0.510  10.501
   2   6  -7  2.7349  7.3783
   2   6  -7  1.6132  8.7053
  -2  -6   7   0.679  11.715
  -2  -6   7  -11.97    9.83
   1   6  -7  -1.707   9.602
   1   6  -7  11.411  10.951
  -1  -6   7   2.947  10.544
  -1  -6   7  1.0315  9.9130
  -1   6   7  4.1236  6.9278
  -1   6   7  7.8390  4.1313
   1  -6  -7  2.4487  4.6331
   1  -6  -7  2.0380  5.4481
   0   6   7  217.41   24.35
   0   6   7  224.72   24.86
   0  -6  -7  208.94   23.28
   0  -6  -7  212.28   23.31
   0   6  -7  166.59   24.60
   0   6  -7  172.62   23.32
   0  -6   7  179.80   25.00
   0  -6   7  154.14   20.48
   1   6   7  403.63   42.51
   1   6   7  463.44   48.26
  -1  -6  -7  416.46   43.64
  -1  -6  -7  418.52   43.83
  -1   6  -7  457.79   48.82
  -1   6  -7  396.57   43.02
   1  -6   7  402.22   43.47
   1  -6   7  350.50   38.76
   2   6   7  39.965  14.117
   2   6   7   6.506  10.750
  -2  -6  -7   7.535  11.151
  -2  -6  -7  11.746  10.947
  -2   6  -7  46.203  19.546
  -2   6  -7  39.901  18.289
   2  -6   7  12.847  14.066
   3   6   7   3.001  14.656
   3   6   7   6.494  14.169
  -3  -6  -7   5.734  12.802
  -3  -6  -7  -1.376  15.670
  -3   6  -7  -0.732  19.559
  -3   6  -7   3.848  16.864
   3  -6   7  20.778  16.068
   3  -6   7   7.807  15.388
   3   7  -7  41.351  11.262
   3   7  -7  42.185  14.220
  -3  -7   7  47.794  17.531
  -3  -7   7  39.516  15.324
   2   7  -7  -4.501   8.062
   2   7  -7  -12.25   10.12
  -2  -7   7   4.882  11.675
  -2  -7   7  4.3251  9.9015
   1   7  -7  8.0495  9.8322
   1   7  -7  26.682  10.212
  -1  -7   7  14.900  11.592
  -1  -7   7  21.702  13.912
  -1   7   7  24.012   6.186
  -1   7   7  24.295   5.692
   1  -7  -7  13.899   4.715
   1  -7  -7  16.902   5.009
   0   7   7  13.399   7.808
   0  -7  -7  13.617   7.310
   0  -7  -7  17.557  11.317
   0   7  -7  -13.00   14.45
   0   7  -7   9.892  12.372
   0  -7   7  10.285  11.664
   0  -7   7  14.105  12.689
   1   7   7  462.03   48.19
  -1  -7  -7  477.30   49.48
  -1   7  -7  548.14   57.50
  -1   7  -7  554.05   57.84
   1  -7   7  551.74   57.80
   1  -7   7  447.27   47.96
   2   7   7  257.96   29.20
   2   7   7  334.46   37.41
  -2  -7  -7  263.10   30.44
  -2  -7  -7  246.80   28.75
  -2   7  -7  263.23   31.60
  -2   7  -7  300.83   36.60
   2  -7   7  270.54   31.91
   2  -7   7  209.07   27.14
   3   7   7  12.937  14.413
   3   7   7  -1.371  15.041
  -3  -7  -7  -0.506  14.169
  -3  -7  -7  -1.039  15.722
  -3   7  -7  10.543  13.591
  -3   7  -7  10.424  19.277
   3  -7   7  -16.38   15.71
   3  -7   7  -4.004  15.273
   3   8  -7   6.586  14.387
   3   8  -7   7.870  10.491
  -3  -8   7   6.684  12.199
  -3  -8   7  -2.752  13.283
   2   8  -7  34.023   9.975
   2   8  -7  28.838  11.551
  -2  -8   7  26.605  13.976
  -2  -8   7  33.099  11.652
   1   8  -7  165.82   20.77
   1   8  -7  133.99   18.04
  -1  -8   7  122.32   17.89
  -1   8   7  171.08   18.47
  -1   8   7  176.47   19.23
   1  -8  -7  154.91   16.84
   1  -8  -7  154.52   17.75
   0   8   7  642.73   64.93
   0   8   7  605.38   61.48
   0  -8  -7  533.13   54.15
   0  -8  -7  557.00   56.69
   0   8  -7  657.23   67.80
   0   8  -7  589.60   61.22
   0  -8   7  477.94   50.22
   0  -8   7  592.68   61.32
   1   8   7  40.966  10.931
   1   8   7  38.502  12.726
  -1  -8  -7  34.113  13.386
  -1  -8  -7  29.762  10.621
  -1   8  -7  45.060  14.490
  -1   8  -7  38.322  14.169
   1  -8   7  14.810  12.988
   1  -8   7  32.919  13.309
   2   8   7  22.780  12.359
   2   8   7   6.110  10.747
  -2  -8  -7  22.960  12.435
  -2  -8  -7  19.700  12.025
  -2   8  -7  18.404  18.134
  -2   8  -7   3.247  17.313
   2  -8   7  -0.383  15.940
   2  -8   7   8.764  14.515
   3   9  -7  15.786  16.389
   3   9  -7   7.141  12.360
  -3  -9   7   8.549  15.760
  -3  -9   7  19.559  14.618
   2   9  -7  12.159  11.925
   2   9  -7  26.682  10.447
  -2  -9   7  38.348  16.094
  -2  -9   7  21.356  11.812
   1   9  -7  883.88   89.45
   1   9  -7 1004.65  101.13
  -1  -9   7 1147.62  115.31
  -1  -9   7  978.34   98.78
  -1   9   7 1002.72   99.76
  -1   9   7  932.01   92.93
   1  -9  -7 1133.89  113.12
   1  -9  -7  976.93   97.40
   0   9   7  2.5026  8.2741
   0   9   7  11.665   7.486
   0  -9  -7  1.5683  7.7543
   0  -9  -7  7.3873  7.7967
   0   9  -7  21.253  12.677
   0   9  -7  17.108  12.799
   0  -9   7   2.622  12.180
   0  -9   7  -1.000  12.141
   1   9   7  47.435  10.874
   1   9   7  37.668  11.008
  -1  -9  -7  50.887  12.426
  -1  -9  -7  46.921  11.137
  -1   9  -7  18.853  13.809
  -1   9  -7  27.298  13.681
   1  -9   7   3.157  12.449
   1  -9   7  20.162  13.694
   2   9   7  -1.389  11.481
   2   9   7  -2.826  12.022
  -2  -9  -7  13.745  12.574
  -2  -9  -7   0.671  12.208
  -2   9  -7   9.187  14.952
  -2   9  -7  13.578  18.866
   2  -9   7  10.924  15.093
   2  -9   7  11.284  16.363
   2  10  -7  979.88  100.12
   2  10  -7  735.26   75.49
  -2 -10   7  913.78   92.78
  -2 -10   7 1024.28  104.79
   1  10  -7  131.29   20.35
  -1 -10   7  84.422  15.208
  -1 -10   7  146.05   19.88
  -1  10   7  109.72   12.64
  -1  10   7  109.95   13.01
   1 -10  -7  107.46   14.58
   1 -10  -7  95.177  12.280
   0  10   7  18.443   8.076
   0  10   7  20.599   8.997
   0 -10  -7  17.185   8.372
   0 -10  -7  3.5691  8.1907
   0  10  -7  17.287  13.655
   0  10  -7  18.917  12.509
   0 -10   7  22.113  12.051
   0 -10   7  23.717  12.758
   1  10   7  23.512  10.014
   1  10   7  30.224  11.596
  -1 -10  -7  20.996  10.465
  -1 -10  -7  27.953  11.226
  -1  10  -7  15.465  13.963
  -1  10  -7  24.487  15.683
   1 -10   7   9.558  14.182
   1 -10   7  27.811  13.566
   2  10   7  -8.963  16.877
   2  10   7   7.317  15.350
  -2 -10  -7  12.656  12.689
  -2 -10  -7  -17.24   17.65
  -2  10  -7   4.900  21.510
  -2  10  -7   6.867  19.290
   2 -10   7   3.478  20.175
   2 -10   7   2.939  15.478
   2  11  -7  25.642  12.780
   2  11  -7  21.741  23.627
  -2 -11   7  44.508  17.557
  -2 -11   7  31.264  16.440
   1  11  -7  22.562  13.745
   1  11  -7  33.535  18.994
  -1 -11   7   8.213  18.057
  -1 -11   7  17.467  13.052
  -1  11   7  12.331   7.826
  -1  11   7 -0.1068  5.9088
   1 -11  -7  12.988   9.519
   0  11   7  28.825   9.235
   0  11   7  30.686  14.002
   0 -11  -7  26.643  13.322
   0 -11  -7  30.943   9.605
   0  11  -7  14.143  14.066
   0  11  -7   4.239  18.430
   0 -11   7   7.409  13.437
   0 -11   7  -10.01   22.01
   1  11   7  93.753  16.248
   1  11   7  92.444  15.491
  -1 -11  -7  88.760  15.131
  -1 -11  -7  89.286  15.170
  -1  11  -7  55.610  18.250
   1 -11   7  28.646  19.854
   1 -11   7  50.117  16.030
   2  11   7  30.904  15.285
   2  11   7  13.322  13.206
  -2 -11  -7  15.953  14.746
  -2 -11  -7  23.101  15.118
  -2  11  -7  19.315  18.571
  -2  11  -7  14.105  15.722
   2 -11   7  17.544  17.518
   2 -11   7  10.424  15.966
   2  12  -7  244.75   28.65
   2  12  -7  174.29   31.12
  -2 -12   7  263.35   33.12
  -2 -12   7  178.26   25.51
   1  12  -7  589.60   61.77
   1  12  -7  388.23   42.19
  -1 -12   7  611.41   65.20
  -1  12   7  535.69   54.70
  -1  12   7  461.38   46.87
   1 -12  -7  489.36   50.04
   1 -12  -7  432.51   44.34
   0  12   7  13.463  11.237
   0 -12  -7  11.628   9.002
   0 -12  -7  0.1518  9.4407
   0  12  -7  19.918  15.247
   0  12  -7  -1.294  20.932
   0 -12   7  -6.920  15.658
   0 -12   7  26.002  21.767
   1  12   7  178.26   22.91
   1  12   7  164.92   22.16
  -1 -12  -7  156.83   20.50
  -1 -12  -7  146.31   20.32
  -1  12  -7  85.436  28.248
  -1  12  -7  149.00   22.83
   1 -12   7  137.45   22.19
   1 -12   7  128.03   26.87
   2  12   7  21.253  16.902
   2  12   7  34.909  14.810
  -2 -12  -7  41.916  17.916
  -2 -12  -7   7.476  16.312
  -2  12  -7  16.261  18.532
  -2  12  -7   3.909  15.632
   2 -12   7  -6.640  15.375
   2 -12   7  -0.435  18.045
   2  13  -7  20.432  20.637
   2  13  -7  49.514  14.592
  -2 -13   7  42.609  19.521
  -2 -13   7  30.981  14.605
  -2  13   7  17.839   6.248
   1  13  -7  436.49   46.91
   1  13  -7  396.44   44.38
  -1 -13   7  312.00   39.00
  -1 -13   7  446.62   48.47
  -1  13   7  440.59   45.96
  -1  13   7  345.75   36.05
   1 -13  -7  513.36   52.93
   1 -13  -7  377.83   39.36
   0  13   7  27.709  14.528
   0  13   7  33.112  12.962
   0 -13  -7  37.155  10.954
   0  13  -7  40.106  16.466
   0  13  -7  82.561  17.339
   0 -13   7  30.956  14.875
   0 -13   7  33.420  15.824
   1  13   7  227.93   27.14
   1  13   7  223.31   28.72
  -1 -13  -7  195.98   25.01
  -1 -13  -7  258.99   29.93
  -1  13  -7  172.62   25.60
  -1  13  -7  249.37   32.15
   1 -13   7  176.21   26.36
   2  13   7  250.01   30.57
   2  13   7  300.70   36.80
  -2 -13  -7  303.27   37.00
  -2 -13  -7  256.94   31.80
  -2  13  -7  232.17   35.45
   2 -13   7  243.21   43.84
   2 -13   7  220.75   34.56
   2  14  -7   5.007  17.377
   2  14  -7   4.891  17.069
  -2 -14   7  -6.307  32.162
  -2 -14   7  27.093  15.824
  -2  14   7  4.4111  9.1853
   1  14  -7  117.74   21.59
   1  14  -7  84.974  25.296
  -1 -14   7  78.442  24.166
  -1 -14   7  58.767  16.838
  -1  14   7  55.892  12.389
  -1  14   7  64.940  12.513
   1 -14  -7  56.983  15.491
   1 -14  -7  67.597  14.053
   0  14   7   5.846  12.635
   0  14   7  28.492  10.926
   0 -14  -7  12.860  11.728
   0 -14  -7   4.226  10.174
   0  14  -7  22.665  15.670
   0  14  -7  19.418  15.157
   0 -14   7  25.886  15.824
   0 -14   7   6.100  15.375
   1  14   7  58.870  19.752
   1  14   7  29.339  13.963
  -1 -14  -7  40.427  18.661
  -1 -14  -7  51.927  15.414
  -1  14  -7  22.113  16.620
  -1  14  -7  28.684  17.441
   1 -14   7  28.389  17.210
   1 -14   7  21.767  17.762
   1  15  -7  24.885  15.183
   1  15  -7  42.006  24.872
  -1 -15   7  21.099  21.600
  -1 -15   7  38.630  18.006
  -1  15   7  15.029   9.026
  -1  15   7  11.729  15.324
   1 -15  -7  28.389  11.026
   1 -15  -7  28.042  14.913
   0  15   7  68.585  14.759
   0  15   7  69.342  13.655
   0 -15  -7  56.406  12.815
   0 -15  -7  61.552  14.733
   0  15  -7  64.735  17.839
   0  15  -7  53.890  17.852
   0 -15   7  79.828  19.687
   0 -15   7  53.428  17.570
   1  15   7  369.36   40.52
   1  15   7  463.95   51.55
  -1 -15  -7  457.53   49.54
  -1 -15  -7  475.63   51.40
  -1  15  -7  550.32   60.55
   1 -15   7  363.46   42.52
   1  16  -7  156.70   26.22
   1  16  -7  115.29   23.09
  -1 -16   7  131.42   25.14
  -1 -16   7  73.244  27.170
  -1  16   7  70.600  19.379
  -1  16   7  109.24   16.32
   1 -16  -7  105.98   18.93
   1 -16  -7  118.23   18.83
   0  16   7  295.82   34.33
   0  16   7  312.51   33.68
   0 -16  -7  328.94   37.96
   0 -16  -7  237.81   27.32
   0  16  -7  307.76   37.78
   0 -16   7  336.38   40.31
   1  16   7   7.735  13.617
   1  16   7  20.996  17.826
  -1 -16  -7   4.246  15.439
  -1 -16  -7  21.163  16.184
  -1  16  -7   4.505  20.355
  -1  16  -7  18.032  18.301
   1 -16   7  -5.624  15.735
   1 -16   7  -1.422  18.725
   0  17   7  -2.641  11.918
   0  17   7  -0.012  17.287
   0 -17  -7   4.794  12.439
   0 -17  -7   3.518  14.862
   0  17  -7  -14.45   16.45
   0  17  -7  11.977  20.137
   0 -17   7  -1.176  20.714
   0 -17   7  -5.072  17.801
  -2   0   8  467.80   46.95
  -2   0   8  521.96   52.30
   2   0  -8  535.44   53.66
   2   0  -8  537.49   54.08
  -1   0   8 1040.07  103.94
  -1   0   8  962.94   96.20
   1   0  -8 1061.50  106.15
   1   0  -8 1087.17  108.36
   0   0  -8  75.374  12.898
   0   0  -8  85.744  13.553
   0   0   8  75.746  12.885
   0   0   8  105.77   15.48
  -1   0  -8  386.56   40.57
  -1   0  -8  416.46   44.11
   1   0   8  465.36   48.82
   1   0   8  364.62   38.91
  -2   0  -8  26.810  11.071
  -2   0  -8  36.847  11.529
   2   0   8  32.252  13.681
   2   0   8  35.024  12.228
  -3   0  -8   4.290  15.529
  -3   0  -8   2.186  18.828
   3   0   8  -8.383  19.777
   3   0   8   7.046  14.361
   2   1  -8  70.241   8.872
   2   1  -8  79.789  11.172
  -2  -1   8  73.693  10.152
  -2  -1   8  77.595  10.719
  -2   1   8  52.709   6.200
  -2   1   8  62.130   7.149
   1   1  -8  25.001   7.798
   1   1  -8  18.789   7.454
  -1  -1   8  24.513   7.824
  -1  -1   8  22.331   7.973
  -1   1   8  22.960   6.888
  -1   1   8  18.019  10.168
   1  -1  -8  21.484   8.411
   1  -1  -8  9.0018  7.8891
   0   1   8 1012.86  102.29
   0   1   8  813.68   82.10
   0  -1  -8  991.69   99.69
   0  -1  -8  905.31   90.90
   0   1  -8  882.47   88.98
   0   1  -8  786.73   79.56
   0  -1   8  747.58   75.76
   0  -1   8  753.36   76.40
   1   1   8  71.088  12.950
   1   1   8  90.326  15.196
  -1  -1  -8  86.899  14.823
  -1  -1  -8  82.305  13.065
  -1   1  -8  85.488  15.452
  -1   1  -8  105.23   15.63
   1  -1   8  100.45   15.82
   1  -1   8  104.11   16.52
   2   1   8  57.458  14.541
  -2  -1  -8  63.516  13.463
  -2  -1  -8  57.086  12.466
  -2   1  -8  63.169  14.182
  -2   1  -8  44.598  12.036
   2  -1   8  72.191  14.105
   2  -1   8  76.286  16.094
   3   1   8   9.338  15.324
   3   1   8  24.911  16.363
  -3  -1  -8   2.609  13.027
  -3  -1  -8   3.840  15.427
  -3   1  -8  -1.626  16.825
  -3   1  -8   6.427  13.181
   3  -1   8   2.364  15.901
   3  -1   8  16.184  15.709
  -3  -2   8  3.7771  7.1088
   2   2  -8   6.269  10.059
   2   2  -8  10.478   5.538
  -2  -2   8  7.8840  6.6018
  -2  -2   8  16.543   5.727
   1   2  -8  330.35   34.52
   1   2  -8  378.86   40.09
  -1  -2   8  351.14   37.14
  -1  -2   8  353.96   36.97
  -1   2   8  317.77   33.23
  -1   2   8  401.19   41.27
   1  -2  -8  326.88   33.66
   1  -2  -8  333.04   34.05
   0   2   8 1198.06  120.15
   0   2   8  981.16   98.40
   0  -2  -8 1031.73  103.20
   0  -2  -8 1406.61  140.66
   0   2  -8 1196.26  119.66
   0   2  -8 1078.19  108.19
   0  -2   8 1037.38  104.26
   1   2   8 1204.22  120.64
   1   2   8 1239.13  124.04
  -1  -2  -8 1283.40  128.60
  -1  -2  -8 1236.94  123.72
  -1   2  -8 1393.78  140.15
  -1   2  -8 1391.21  138.99
   1  -2   8 1534.95  153.75
   1  -2   8 1275.83  127.98
   2   2   8  13.309  11.525
   2   2   8  19.046  14.002
  -2  -2  -8  26.438  11.429
  -2   2  -8  27.568  13.784
  -2   2  -8  24.372  11.923
   2  -2   8  25.245  14.323
   2  -2   8  24.629  12.753
   3   2   8  -10.72   19.06
   3   2   8   6.773  21.292
  -3  -2  -8   1.489  12.833
  -3  -2  -8  -4.854  15.747
  -3   2  -8   5.078  13.052
  -3   2  -8  16.646  22.999
   3  -2   8  -2.909  22.229
   3  -2   8  25.527  16.132
   3   3  -8  87.169  11.979
  -3  -3   8  126.49   14.98
   2   3  -8  -3.600   7.277
   2   3  -8  0.7150  6.0346
  -2  -3   8  2.0445  6.0204
  -2  -3   8  7.5361  6.0076
   1   3  -8  361.92   37.78
   1   3  -8  324.83   34.14
  -1  -3   8  341.90   36.72
  -1  -3   8  330.22   34.79
  -1   3   8  408.25   41.43
  -1   3   8  407.74   41.24
   1  -3  -8  396.44   40.16
   0   3   8 2170.24  215.36
   0   3   8 2168.95  215.23
   0  -3  -8 1954.62  194.05
   0  -3  -8 2215.16  219.59
   0   3  -8 2136.87  212.53
   0   3  -8 1599.12  159.27
   0  -3   8 1690.24  168.51
   0  -3   8 1703.08  169.67
   1   3   8  250.78   28.13
   1   3   8  261.56   29.06
  -1  -3  -8  234.99   26.40
  -1  -3  -8  234.09   26.73
  -1   3  -8  234.61   29.34
  -1   3  -8  242.56   27.97
   1  -3   8  243.85   30.49
   1  -3   8  213.69   25.91
   2   3   8  498.73   52.30
   2   3   8  477.81   50.86
  -2  -3  -8  386.95   41.30
  -2  -3  -8  420.83   44.64
  -2   3  -8  399.52   43.80
  -2   3  -8  508.61   54.30
   2  -3   8  481.02   52.67
   2  -3   8  459.97   50.28
   3   3   8   9.717  15.452
   3   3   8  -15.26   15.09
  -3  -3  -8  21.677  16.030
  -3  -3  -8  -2.352  13.566
  -3   3  -8  11.018  13.399
  -3   3  -8  17.583  18.276
   3  -3   8  -3.167  15.760
   3  -3   8  25.899  16.120
   3   4  -8  10.655   9.151
  -3  -4   8  11.940  10.641
   2   4  -8  216.64   24.00
   2   4  -8  194.44   21.54
  -2  -4   8  206.24   22.42
  -2  -4   8  200.34   22.06
   1   4  -8  131.68   17.02
   1   4  -8  138.48   18.10
  -1  -4   8  139.89   17.71
  -1  -4   8  122.10   17.92
  -1   4   8  197.90   20.83
  -1   4   8  191.23   20.84
   1  -4  -8  165.56   18.02
   1  -4  -8  182.89   19.58
   0   4   8 1644.04  163.51
   0   4   8 1767.25  175.70
   0  -4  -8 1760.83  175.18
   0  -4  -8 1514.42  150.67
   0   4  -8 1375.81  137.58
   0   4  -8 1574.74  157.09
   0  -4   8 1434.85  143.48
   0  -4   8 1146.59  115.08
   1   4   8  966.02   97.28
   1   4   8 1018.51  103.07
  -1  -4  -8  884.27   89.75
  -1  -4  -8  863.22   87.31
  -1   4  -8  727.56   74.53
  -1   4  -8  952.41   96.52
   1  -4   8  804.44   82.28
   1  -4   8  709.08   72.74
   2   4   8  141.94   20.83
   2   4   8  97.603  16.440
  -2  -4  -8  102.74   15.90
  -2  -4  -8  119.02   17.65
  -2   4  -8  131.68   19.82
  -2   4  -8  107.38   22.86
   2  -4   8  93.868  17.724
   3   4   8  -36.71   15.34
   3   4   8  -4.811  14.336
  -3  -4  -8  22.075  25.116
  -3  -4  -8   3.724  13.720
  -3   4  -8  -6.672  18.571
  -3   4  -8   1.595  13.142
   3  -4   8   5.982  15.850
   3  -4   8   3.455  16.197
   3   5  -8  280.81   33.43
   3   5  -8  250.26   28.99
  -3  -5   8  262.58   29.75
   2   5  -8  49.655  12.330
   2   5  -8  28.851   8.268
  -2  -5   8  22.896  11.311
  -2  -5   8  35.024   9.570
   1   5  -8  346.52   36.65
   1   5  -8  360.12   38.08
  -1  -5   8  319.44   34.96
  -1   5   8  466.00   46.95
  -1   5   8  459.46   46.29
   1  -5  -8  474.86   47.69
   1  -5  -8  431.10   43.43
   0   5   8  95.062  13.668
   0   5   8  75.503  13.912
   0  -5  -8  80.598  11.952
   0   5  -8  73.141  14.618
   0   5  -8  62.155  13.989
   0  -5   8  53.672  13.784
   1   5   8 1258.89  126.13
   1   5   8 1465.65  146.31
  -1  -5  -8 1236.05  123.78
  -1  -5  -8 1256.07  125.71
  -1   5  -8 1165.59  117.48
  -1   5  -8 1199.08  120.74
   1  -5   8 1159.30  116.80
   1  -5   8 1193.44  120.38
   2   5   8  402.99   44.41
   2   5   8  444.19   49.24
  -2  -5  -8  401.45   43.14
  -2  -5  -8  380.66   43.14
  -2   5  -8  452.91   48.77
   2  -5   8  506.30   54.19
   2  -5   8  414.67   45.16
   3   5   8   4.737  13.874
   3   5   8  -11.42   15.12
  -3  -5  -8  17.441  18.378
  -3  -5  -8  -7.517  16.261
  -3   5  -8  11.797  14.656
  -3   5  -8  -9.801  20.239
   3  -5   8   3.135  15.850
   3  -5   8  18.199  17.146
   3   6  -8  26.592  12.924
   3   6  -8  13.373   9.724
  -3  -6   8  20.060  11.981
   2   6  -8  11.316   8.399
   2   6  -8  15.619   9.677
  -2  -6   8  24.693  10.008
  -2  -6   8  32.521  10.881
   1   6  -8  388.49   41.08
  -1  -6   8  405.30   42.63
  -1   6   8  584.46   58.63
  -1   6   8  509.51   51.35
   1  -6  -8  532.74   53.70
   1  -6  -8  505.02   50.94
   0  -6  -8  266.69   29.84
   0   6  -8  237.56   27.90
   0   6  -8  228.96   27.30
   0  -6   8  170.18   21.66
   0  -6   8  191.61   23.77
   1   6   8  19.302  10.713
   1   6   8  21.702  10.872
  -1  -6  -8   8.486  10.003
  -1  -6  -8  17.801   9.622
  -1   6  -8   7.503  13.347
  -1   6  -8   3.445  13.181
   1  -6   8  -8.223  13.155
   1  -6   8  -3.296  13.335
   2   6   8  87.130  16.761
   2   6   8  86.424  15.375
  -2  -6  -8  66.326  15.016
  -2  -6  -8  94.536  16.351
  -2   6  -8  76.722  19.482
  -2   6  -8  72.281  17.467
   2  -6   8  79.160  17.352
   2  -6   8  94.484  18.905
   3   7  -8   9.668  10.339
   3   7  -8  49.142  19.957
  -3  -7   8  17.056  13.643
   2   7  -8  25.180   9.650
   2   7  -8  31.366  12.847
  -2  -7   8  30.173  16.671
  -2  -7   8  38.528  16.132
   1   7  -8  9.2482  9.7808
   1   7  -8  27.401  17.685
  -1  -7   8  10.793  11.477
  -1  -7   8   6.040  10.421
  -1   7   8  18.969   5.064
  -1   7   8  7.5926  7.6773
   1  -7  -8  18.276   6.298
   1  -7  -8  13.976   5.231
   0   7   8  12.924   8.470
   0   7   8  16.235   8.016
   0  -7  -8  9.5562  7.3732
   0  -7  -8  5.6803  7.3244
   0   7  -8   2.015  12.814
   0   7  -8  10.446  12.540
   0  -7   8  14.207  12.847
   0  -7   8  11.829  12.246
   1   7   8  416.46   43.76
   1   7   8  480.25   50.31
  -1  -7  -8  343.57   36.73
  -1  -7  -8  420.96   44.30
  -1   7  -8  328.29   37.42
  -1   7  -8  373.73   41.25
   1  -7   8  345.24   38.89
   1  -7   8  270.28   31.94
   2   7   8  25.617  12.178
   2   7   8  47.948  15.157
  -2  -7  -8  28.119  12.671
  -2  -7  -8  24.872  12.710
  -2   7  -8   5.436  15.350
  -2   7  -8  39.452  19.931
   2  -7   8  40.004  16.684
   2  -7   8  32.688  17.133
   3   8  -8  25.257  20.868
   3   8  -8  15.157  14.656
  -3  -8   8  19.610  19.829
  -3  -8   8  27.683  17.685
   2   8  -8  11.400  11.008
   2   8  -8   3.291  13.604
  -2  -8   8   9.393  11.884
  -2  -8   8  -17.25   13.86
   1   8  -8  -3.911  10.204
   1   8  -8  -0.279  11.589
  -1  -8   8   6.115  11.997
  -1  -8   8  -0.351  10.759
  -1   8   8  -2.350   6.561
  -1   8   8  10.885   7.739
   1  -8  -8 -0.3705  5.1144
   1  -8  -8  9.2572  7.0639
   0   8   8  84.794  12.394
   0   8   8  79.481  13.604
   0  -8  -8  76.311  11.510
   0  -8  -8  68.316  12.911
   0   8  -8  87.323  16.954
   0   8  -8  74.001  15.940
   0  -8   8  66.005  14.567
   0  -8   8  56.624  14.361
   1   8   8  249.49   27.80
   1   8   8  223.31   25.71
  -1  -8  -8  211.76   24.56
  -1  -8  -8  218.18   25.17
  -1   8  -8  207.65   26.58
  -1   8  -8  209.32   26.60
   1  -8   8  192.77   25.06
   1  -8   8  182.12   24.58
   2   8   8  -6.462  11.089
   2   8   8  -15.18   13.82
  -2  -8  -8   9.169  11.979
  -2  -8  -8  -7.912  12.224
  -2   8  -8  15.812  19.636
  -2   8  -8   0.715  14.964
   2  -8   8  13.039  16.261
   2  -8   8  24.166  17.339
   2   9  -8  36.808  12.539
   2   9  -8  28.761  10.523
  -2  -9   8  32.611  13.720
  -2  -9   8  32.765  15.722
   1   9  -8  -15.41   12.12
   1   9  -8   6.269  11.356
  -1  -9   8  -1.425  11.590
  -1  -9   8   7.762  11.436
  -1   9   8  4.5651  4.9732
   1  -9  -8 -0.1693  7.8737
   1  -9  -8  -1.881   5.656
   0   9   8  11.932  10.754
   0   9   8   4.781  10.218
   0  -9  -8  -1.493   7.839
   0  -9  -8  10.039  13.822
   0   9  -8  -1.485  12.803
   0   9  -8  24.590  14.361
   0  -9   8   7.878  12.494
   0  -9   8  17.634  13.078
   1   9   8  90.146  14.053
   1   9   8  90.814  14.695
  -1  -9  -8  77.941  13.155
  -1  -9  -8  90.647  14.579
  -1   9  -8  86.643  19.123
  -1   9  -8  99.207  18.237
   1  -9   8  78.352  18.109
   1  -9   8  58.215  15.850
   2   9   8  100.07   18.88
   2   9   8  94.330  18.725
  -2  -9  -8  92.033  16.646
  -2  -9  -8  73.680  15.439
  -2   9  -8  59.345  21.638
  -2   9  -8  44.534  17.595
   2  -9   8  49.770  20.214
   2  -9   8  48.526  18.455
   2  10  -8   8.361  10.668
   2  10  -8  17.801  13.129
  -2 -10   8  -4.201  13.424
  -2 -10   8   3.841  15.401
   1  10  -8  88.273  16.954
   1  10  -8  108.63   18.11
  -1 -10   8  159.78   22.24
  -1 -10   8  105.11   18.07
  -1  10   8  96.371  11.904
  -1  10   8  106.48   13.01
   1 -10  -8  110.39   13.13
   1 -10  -8  108.60   14.19
   0  10   8  10.922  13.553
   0  10   8  2.9467  9.0339
   0 -10  -8  5.8267  9.6217
   0 -10  -8   8.840  11.271
   0  10  -8   2.595  13.745
   0  10  -8   4.687  14.284
   0 -10   8  -9.128  13.476
   0 -10   8   3.212  12.898
   1  10   8  52.851  12.192
   1  10   8  45.882  12.505
  -1 -10  -8  38.810  11.372
  -1 -10  -8  59.973  13.463
  -1  10  -8  22.472  20.830
  -1  10  -8  30.147  21.946
   1 -10   8   4.955  17.672
   2  10   8  30.237  14.746
   2  10   8   0.382  12.975
  -2 -10  -8   7.498  13.848
  -2 -10  -8   6.711  13.540
  -2  10  -8  -5.632  20.175
  -2  10  -8  -3.600  15.491
   2 -10   8  -2.361  18.738
   2 -10   8  21.779  17.108
   2  11  -8  46.716  12.339
  -2 -11   8  55.584  18.455
  -2 -11   8  110.05   18.65
   1  11  -8 1676.13  168.00
   1  11  -8 1813.45  181.09
  -1 -11   8 1872.49  187.12
  -1 -11   8 1853.24  185.45
  -1  11   8 1379.66  137.58
  -1  11   8 1572.17  156.58
   1 -11  -8 1256.58  125.13
   1 -11  -8 1338.59  133.73
   0  11   8 1858.37  185.07
   0  11   8 1477.20  147.46
   0 -11  -8 1676.13  166.84
   0 -11  -8 1522.12  151.57
   0  11  -8 1690.24  169.28
   0  11  -8 1409.18  142.07
   0 -11   8 1486.18  149.00
   0 -11   8 1532.38  153.75
   1  11   8  59.614  13.976
  -1 -11  -8  41.557  16.248
  -1 -11  -8  49.719  13.091
  -1  11  -8  37.642  16.081
  -1  11  -8  47.242  19.533
   1 -11   8  34.241  16.248
   1 -11   8  33.766  14.900
   2  11   8  -4.777  16.184
   2  11   8  10.484  14.182
  -2 -11  -8  23.846  16.736
  -2 -11  -8   0.304  14.746
  -2  11  -8  14.130  23.525
  -2  11  -8  15.452  19.906
   2 -11   8   4.256  22.729
   2 -11   8  -2.541  16.967
   2  12  -8  97.077  16.055
  -2 -12   8  128.98   23.04
   1  12  -8  27.157  18.186
   1  12  -8   1.223  13.912
  -1 -12   8  -6.361  13.989
  -1 -12   8   5.991  20.368
  -1  12   8  13.360   9.670
  -1  12   8  11.244   8.296
   1 -12  -8  12.885   7.845
   1 -12  -8   0.208  11.522
   0  12   8  109.59   20.02
   0  12   8  100.17   15.14
   0 -12  -8  112.37   16.21
   0 -12  -8  103.53   17.97
   0  12  -8  72.050  17.210
   0  12  -8  98.270  19.572
   0 -12   8  111.17   20.98
   0 -12   8  99.541  18.430
   1  12   8  -0.203  11.757
   1  12   8  -5.081  11.470
  -1 -12  -8  -4.674  11.878
  -1 -12  -8   0.353  12.097
  -1  12  -8   7.635  16.851
  -1  12  -8  12.631  17.711
   1 -12   8  15.170  15.927
   1 -12   8  17.236  16.004
   2  12   8  22.973  15.106
   2  12   8  39.118  18.674
  -2 -12  -8  89.594  20.021
  -2 -12  -8  56.418  16.402
  -2  12  -8  33.651  18.455
  -2  12  -8  33.343  33.728
   2 -12   8  44.778  26.387
   2 -12   8  29.826  20.714
   2  13  -8  48.179  15.131
  -2 -13   8  86.694  23.127
  -2 -13   8  111.21   24.82
   1  13  -8  185.97   24.49
   1  13  -8  302.37   34.83
  -1  13   8  296.72   33.20
  -1  13   8  233.19   25.36
   1 -13  -8  190.46   22.14
   1 -13  -8  238.07   26.45
   0  13   8  408.76   43.05
   0  13   8  382.97   41.30
   0 -13  -8  366.54   39.27
   0 -13  -8  354.60   37.89
   0  13  -8  394.00   43.91
   0  13  -8  345.75   39.36
   0 -13   8  370.01   42.34
   0 -13   8  367.44   41.35
   1  13   8  21.561  17.390
   1  13   8  21.972  13.283
  -1 -13  -8  -1.955  15.478
  -1 -13  -8  13.142  13.630
  -1  13  -8  13.758  17.031
  -1  13  -8   7.146  17.095
   1 -13   8   7.842  15.452
   1 -13   8  -2.571  17.031
   1  14  -8  300.96   35.47
   1  14  -8  289.02   33.59
  -1 -14   8  320.47   37.54
  -1 -14   8  311.48   37.05
  -1  14   8  258.48   28.90
  -1  14   8  238.33   26.59
   1 -14  -8  312.89   33.64
   0  14   8  91.289  14.708
   0  14   8  81.445  15.196
   0 -14  -8  78.493  13.861
   0 -14  -8  66.660  14.182
   0  14  -8  118.20   22.15
   0  14  -8  81.445  18.609
   0 -14   8  51.785  17.531
   0 -14   8  69.060  18.609
   1  14   8  96.717  17.377
   1  14   8  99.412  18.237
  -1 -14  -8  96.127  18.378
  -1 -14  -8  109.54   19.32
  -1  14  -8  97.231  22.665
  -1  14  -8  105.14   25.00
   1 -14   8  73.347  26.181
   1 -14   8  69.394  27.170
   1  15  -8  27.311  19.675
   1  15  -8  82.728  26.323
  -1 -15   8  109.05   21.92
  -1 -15   8  101.07   25.78
  -1  15   8  86.142  15.311
  -1  15   8  89.915  14.695
   1 -15  -8  84.037  20.355
   0  15   8  108.56   17.49
   0 -15  -8  124.39   21.38
   0 -15  -8  76.991  13.912
   0  15  -8  123.53   25.10
   0  15  -8  97.205  27.157
   0 -15   8  100.09   25.83
   0 -15   8  99.836  21.959
   1  15   8   3.232  14.464
   1  15   8  15.439  13.078
  -1 -15  -8  13.822  15.439
  -1 -15  -8  14.400  11.578
  -1  15  -8  -3.015  17.095
   1 -15   8  -4.121  22.870
   1 -15   8   6.900  16.620
   1  16  -8  11.629  25.912
  -1 -16   8  -25.08   28.12
  -1 -16   8   9.610  18.597
  -1  16   8  -5.588  14.310
  -1  16   8  14.952  11.712
   1 -16  -8  -3.501  15.106
   1 -16  -8  -1.342  11.109
   0  16   8  11.638  13.797
   0  16   8   4.448  11.498
   0 -16  -8  -3.404  14.361
   0 -16  -8  -6.660  11.660
   0  16  -8  -7.129  21.497
   0  16  -8  -0.107  17.968
   0 -16   8  19.559  18.571
   0 -16   8   9.751  21.433
  -2   0   9  -3.011   4.176
  -2   0   9  0.4461  5.8613
   2   0  -9 -0.6785  3.9054
   2   0  -9  -8.922   4.659
  -1   0   9  1.9097  9.0814
  -1   0   9  2.2113  8.2112
   1   0  -9  -6.264   8.206
   1   0  -9  -5.892   7.322
   0   0  -9  10.958  13.694
   0   0  -9  1.2547  9.6037
   0   0   9  -2.735  10.030
   0   0   9  -0.558  15.542
  -1   0  -9   4.145  14.849
  -1   0  -9  14.618  15.298
   1   0   9  16.440  14.926
   1   0   9  13.296  14.798
  -2   0  -9  -10.26   11.87
  -2   0  -9  17.672  17.236
   2   0   9   4.373  17.891
   2   0   9  -1.674  12.200
  -3   0  -9  22.113  18.674
  -3   0  -9  11.037  16.761
   3   0   9  -12.48   15.91
   3   0   9   6.345  18.186
   2   1  -9  37.360   8.678
   2   1  -9  37.039   6.400
  -2  -1   9  32.496   6.678
  -2  -1   9  37.103   6.846
  -2   1   9  24.731   5.261
  -2   1   9  23.576   4.969
   2  -1  -9  22.331   4.767
   1   1  -9  20.509   7.265
   1   1  -9  15.170   8.112
  -1  -1   9  15.516   7.658
  -1  -1   9  6.9676  7.5143
  -1   1   9  28.646   7.460
  -1   1   9  13.976   7.335
   1  -1  -9  23.037  10.293
   1  -1  -9  25.681   8.002
   0   1   9  124.49   16.09
   0   1   9  135.40   17.69
   0  -1  -9  155.68   19.07
   0  -1  -9  152.73   18.65
   0   1  -9  116.60   16.71
   0   1  -9  162.61   20.32
   0  -1   9  144.00   20.39
   0  -1   9  144.25   18.83
   1   1   9  15.863  11.220
   1   1   9  14.900  11.236
  -1  -1  -9  7.8288  9.4459
  -1  -1  -9   0.432  10.559
  -1   1  -9   6.733  14.939
   2   1   9  47.948  14.875
   2   1   9  20.252  13.270
  -2  -1  -9  27.876  12.571
  -2   1  -9  43.738  14.631
  -2   1  -9  30.725  12.885
   2  -1   9  29.351  13.822
   2  -1   9  32.201  13.219
   3   1   9  25.026  16.376
   3   1   9  16.081  18.057
  -3  -1  -9  23.948  18.481
  -3  -1  -9  11.160  16.569
  -3   1  -9  29.557  17.467
  -3   1  -9  20.368  20.008
   3  -1   9  10.566  18.378
   3  -1   9  22.652  17.621
  -3  -2   9  16.017   6.205
   2   2  -9  2.8543  6.2245
   2   2  -9  7.7210  5.7111
  -2  -2   9  2.5309  6.0692
  -2  -2   9  0.3013  5.3556
   1   2  -9  264.51   29.67
   1   2  -9  274.78   29.88
  -1  -2   9  223.31   25.04
  -1  -2   9  260.40   27.98
  -1   2   9  299.93   31.98
  -1   2   9  273.24   28.58
   1  -2  -9  255.53   27.57
   1  -2  -9  304.04   31.84
   0   2   9  23.448   8.662
   0  -2  -9  34.062   8.510
   0   2  -9  29.942  11.293
   0   2  -9  16.261  11.155
   0  -2   9  22.241  11.506
   0  -2   9  25.437  10.353
   1   2   9  112.44   16.29
   1   2   9  123.17   17.21
  -1  -2  -9  112.89   15.54
  -1  -2  -9  116.64   16.59
  -1   2  -9  146.95   19.84
  -1   2  -9  126.74   19.03
   1  -2   9  103.28   16.81
   1  -2   9  130.39   21.55
   2   2   9  346.26   38.31
   2   2   9  347.55   38.18
  -2  -2  -9  321.36   35.99
  -2  -2  -9  280.04   31.82
  -2   2  -9  336.12   38.17
  -2   2  -9  353.83   39.11
   2  -2   9  358.71   40.00
   2  -2   9  325.21   36.97
   3   2   9  12.603  22.100
   3   2   9  10.352  16.376
  -3  -2  -9  -13.60   17.78
  -3  -2  -9  -36.53   29.83
  -3   2  -9  20.599  16.954
  -3   2  -9   9.104  21.048
   3  -2   9   5.034  17.647
   3  -2   9  20.791  17.621
  -3  -3   9   7.489  10.131
   2   3  -9  7.9199  6.4825
   2   3  -9  15.709  11.513
  -2  -3   9  11.987   6.367
  -2  -3   9  11.397   7.214
   1   3  -9  367.82   39.79
   1   3  -9  407.99   42.66
  -1  -3   9  392.34   42.37
  -1  -3   9  326.11   35.51
  -1   3   9  493.21   50.14
  -1   3   9  434.18   44.43
   1  -3  -9  525.43   53.02
   1  -3  -9  479.09   48.68
   0   3   9 2179.22  216.25
   0   3   9 2369.16  235.12
   0  -3  -9 2308.84  228.96
   0  -3  -9 2288.31  226.91
   0   3  -9 2615.58  259.63
   0   3  -9 2329.38  231.65
   0  -3   9 2031.63  202.14
   0  -3   9 1813.45  180.70
   1   3   9  92.726  14.746
   1   3   9  100.61   15.20
  -1  -3  -9  70.844  13.129
  -1  -3  -9  83.716  13.437
  -1   3  -9  72.063  14.669
  -1   3  -9  80.136  15.529
   1  -3   9  53.762  14.759
   1  -3   9  80.200  15.619
   2   3   9  132.83   19.11
   2   3   9  127.02   19.28
  -2  -3  -9  122.45   18.69
  -2  -3  -9  106.50   18.06
  -2   3  -9  138.35   20.41
  -2   3  -9  126.43   20.87
   2  -3   9  139.76   21.37
   2  -3   9  124.21   20.05
   3   4  -9  557.64   58.22
  -3  -4   9  628.48   63.85
  -3  -4   9  530.56   55.06
   2   4  -9  144.77   19.62
   2   4  -9  118.54   14.71
  -2  -4   9  156.58   18.24
  -2  -4   9  133.99   16.90
   1   4  -9  698.56   70.70
  -1   4   9  775.18   77.58
  -1   4   9  694.96   69.65
   1  -4  -9  772.10   77.16
   1  -4  -9  826.13   82.51
   0   4   9  109.37   14.32
   0   4   9  131.42   18.55
   0  -4  -9  88.863  13.296
   0  -4  -9  95.716  12.652
   0   4  -9  78.211  18.725
   0   4  -9  68.097  14.695
   0  -4   9  94.677  16.017
   0  -4   9  61.218  16.479
   1   4   9  230.76   26.39
   1   4   9  201.75   23.99
  -1  -4  -9  185.07   21.64
  -1  -4  -9  227.29   26.03
  -1   4  -9  206.24   25.86
  -1   4  -9  205.47   25.60
   1  -4   9  161.20   22.51
   1  -4   9  200.85   25.23
   2   4   9  391.18   43.48
   2   4   9  389.13   42.21
  -2  -4  -9  358.33   39.32
  -2  -4  -9  376.68   40.95
  -2   4  -9  487.05   53.16
  -2   4  -9  414.28   45.25
   2  -4   9  371.16   41.45
   2  -4   9  471.27   51.19
   3   5  -9  2.9518  9.6178
   3   5  -9   3.266  14.849
  -3  -5   9   3.149  13.347
   2   5  -9  5.3621  9.1507
   2   5  -9  6.5069  7.7736
  -2  -5   9  26.990  13.784
  -2  -5   9  16.890   8.657
   1   5  -9  6.2386  9.4253
   1   5  -9   6.312  10.097
  -1  -5   9  14.669   9.827
  -1  -5   9  12.432  10.104
  -1   5   9  14.117   5.692
  -1   5   9  9.3098  5.7188
   1  -5  -9  10.284   5.461
   1  -5  -9  4.4136  5.1028
   0   5   9  19.431   8.740
   0   5   9  24.795   8.947
   0  -5  -9  15.144   7.356
   0  -5  -9  19.251   8.431
   0   5  -9   4.104  12.210
   0   5  -9   9.887  12.733
   0  -5   9  14.117  12.336
   0  -5   9   3.499  12.491
   1   5   9  133.73   18.16
   1   5   9  137.45   20.42
  -1  -5  -9  127.58   17.33
  -1  -5  -9  90.287  15.812
  -1   5  -9  91.674  22.293
  -1   5  -9  153.37   21.64
   1  -5   9  118.54   22.33
   1  -5   9  94.715  18.353
   2   5   9  -2.827  13.296
   2   5   9  11.429  12.873
  -2  -5  -9  24.423  12.911
  -2  -5  -9   3.201  11.341
  -2   5  -9  20.740  26.464
   3   6  -9  18.160  19.238
  -3  -6   9  -2.395  14.810
   2   6  -9  14.130  10.034
   2   6  -9   7.188  11.603
  -2  -6   9  16.453  14.348
  -2  -6   9  12.539   9.611
   1   6  -9  33.253  14.631
   1   6  -9  42.250  12.780
  -1  -6   9  40.799  11.160
  -1   6   9  67.366   9.134
  -1   6   9  50.810   7.344
   1  -6  -9  72.268   9.424
   1  -6  -9  74.271  10.587
   0   6   9  33.317  12.548
   0   6   9  37.129  10.014
   0  -6  -9  31.174  10.972
   0  -6  -9  43.661   9.334
   0   6  -9  16.928  13.335
   0   6  -9  22.318  13.104
   0  -6   9  38.810  12.545
   0  -6   9  24.564  12.351
   1   6   9  131.29   18.33
   1   6   9  126.85   17.74
  -1  -6  -9  99.951  15.285
  -1  -6  -9  108.58   15.98
  -1   6  -9  78.390  17.108
  -1   6  -9  92.726  17.916
   1  -6   9  58.472  15.658
   1  -6   9  92.328  17.942
   2   6   9  107.24   17.25
   2   6   9  91.443  21.561
  -2  -6  -9  70.074  17.326
  -2  -6  -9  79.109  15.786
  -2   6  -9  86.450  20.098
  -2   6  -9  94.561  25.578
   2  -6   9  79.597  20.060
   2  -6   9  61.770  19.931
   2   7  -9  14.477  11.223
   2   7  -9  9.8386  9.5447
  -2  -7   9  17.236  12.337
  -2  -7   9   2.489  10.971
   1   7  -9  46.126  14.105
  -1  -7   9  56.803  13.039
  -1  -7   9  64.273  13.129
  -1   7   9  86.335  10.874
  -1   7   9  91.173  11.220
   1  -7  -9  83.896  12.120
   1  -7  -9  71.935   9.401
   0   7   9  487.18   49.86
   0   7   9  482.69   49.83
   0  -7  -9  362.82   37.71
   0  -7  -9  396.57   40.95
   0   7  -9  411.33   44.79
   0   7  -9  359.10   39.40
   0  -7   9  353.06   38.43
   0  -7   9  350.24   38.60
   1   7   9  34.177  10.985
   1   7   9  37.309  13.335
  -1  -7  -9  37.334  11.008
  -1  -7  -9  30.930  11.037
  -1   7  -9  23.525  14.708
  -1   7  -9  -1.228  15.016
   1  -7   9  17.108  14.939
   1  -7   9  32.894  15.670
   2   7   9  70.716  14.579
   2   7   9  65.235  17.018
  -2  -7  -9  69.188  15.465
  -2  -7  -9  71.729  15.555
  -2   7  -9  56.354  21.600
  -2   7  -9  45.689  25.861
   2  -7   9  65.402  18.840
   2  -7   9  79.186  29.749
   2   8  -9  21.677  10.491
   2   8  -9  30.160  13.027
  -2  -8   9  24.654  13.335
  -2  -8   9  15.465  12.164
   1   8  -9  88.632  15.311
   1   8  -9  101.06   17.08
  -1  -8   9  95.845  16.877
  -1  -8   9  122.27   17.88
  -1   8   9  147.46   16.08
  -1   8   9  151.18   16.66
   1  -8  -9  134.89   15.98
   1  -8  -9  139.76   16.35
   0   8   9  50.220  11.195
   0   8   9  29.082   8.431
   0  -8  -9  27.003   8.287
   0  -8  -9  24.552   8.696
   0   8  -9  14.336  13.874
   0   8  -9  26.258  14.502
   0  -8   9  12.141  12.847
   0  -8   9  23.576  13.283
   1   8   9  169.15   22.19
   1   8   9  133.35   17.79
  -1  -8  -9  179.03   21.81
  -1  -8  -9  148.62   18.78
  -1   8  -9  117.03   20.61
  -1   8  -9  98.052  20.765
   1  -8   9  130.78   20.93
   1  -8   9  99.425  19.649
   2   8   9  10.347  14.926
   2   8   9  15.542  17.069
  -2  -8  -9  14.002  17.621
  -2  -8  -9  16.736  13.643
  -2   8  -9  15.054  16.325
  -2   8  -9  18.109  20.907
   2   9  -9  45.676  12.217
   2   9  -9  53.852  14.990
  -2  -9   9  76.850  15.542
  -2  -9   9  82.305  16.659
   1   9  -9  297.88   34.01
   1   9  -9  226.78   27.84
  -1  -9   9  248.47   30.34
  -1  -9   9  237.04   28.12
  -1   9   9  326.75   33.77
   1  -9  -9  287.35   29.81
   1  -9  -9  317.51   32.65
   0   9   9  336.64   35.32
   0   9   9  362.56   38.78
   0  -9  -9  315.20   33.16
   0  -9  -9  312.89   33.43
   0   9  -9  278.63   33.01
   0   9  -9  333.68   38.08
   0  -9   9  278.37   33.65
   0  -9   9  307.89   34.81
   1   9   9  52.992  16.120
   1   9   9  74.489  16.761
  -1  -9  -9  62.964  15.991
  -1   9  -9  62.091  22.357
  -1   9  -9  44.496  22.023
   1  -9   9  52.093  19.341
   1  -9   9  32.598  20.522
   2   9   9  95.524  19.405
   2   9   9  65.543  16.197
  -2  -9  -9  79.122  16.748
  -2  -9  -9  74.155  16.697
  -2   9  -9   7.750  20.432
  -2   9  -9  69.098  22.395
   2  -9   9  27.632  18.879
   2  -9   9  46.575  28.492
   2  10  -9  39.169  14.567
   2  10  -9  58.652  15.773
  -2 -10   9  57.599  18.109
  -2 -10   9  43.854  14.348
   1  10  -9 1731.31  173.13
   1  10  -9 1918.69  191.36
  -1 -10   9 1384.79  139.38
  -1 -10   9 2075.26  206.88
  -1  10   9 1672.28  166.20
   1 -10  -9 1835.27  182.24
   0  10   9  114.76   16.13
   0  10   9  84.961  13.116
   0  10  -9  130.39   25.78
   0  10  -9  89.376  20.047
   0 -10   9  76.491  17.583
   0 -10   9  79.366  24.462
   1  10   9  -3.935  10.715
   1  10   9  10.954  11.848
  -1 -10  -9   6.978  10.659
  -1 -10  -9  -2.915  10.224
  -1  10  -9  14.733  18.083
  -1  10  -9  -9.596  15.658
   1 -10   9   7.373  15.953
   1 -10   9  19.739  15.760
   2  10   9   0.565  15.876
   2  10   9  -3.205  15.696
  -2 -10  -9  24.308  15.106
  -2 -10  -9  18.917  14.887
  -2  10  -9  16.838  22.460
  -2  10  -9  16.158  18.173
   2 -10   9  -36.20   20.35
   2 -10   9  13.424  18.212
   2  11  -9   3.393  11.096
   2  11  -9  26.079  21.112
  -2 -11   9  -3.957  12.676
  -2 -11   9  -2.258  16.517
   1  11  -9  48.128  25.206
   1  11  -9  33.022  14.451
  -1 -11   9  20.252  18.378
  -1 -11   9  37.976  27.516
  -1  11   9  18.032   7.140
  -1  11   9  22.344  14.066
   1 -11  -9  37.706  10.660
   1 -11  -9  23.897   8.494
   0  11   9  28.941  10.018
   0  11   9  29.454  11.163
   0 -11  -9  28.440  10.414
   0 -11  -9  26.926   9.774
   0  11  -9  26.554  15.824
   0  11  -9  21.792  15.118
   0 -11   9  11.803  14.926
   0 -11   9   9.152  15.196
   1  11   9  11.303  11.149
   1  11   9  14.810  11.948
  -1 -11  -9  -2.916  11.199
  -1 -11  -9  -10.40   11.30
  -1  11  -9  16.646  18.994
  -1  11  -9  -7.761  16.171
   1 -11   9  -2.403  15.786
   1 -11   9  17.236  16.890
   2  11   9   7.559  21.831
   2  11   9  34.690  17.108
  -2 -11  -9  -3.723  22.203
  -2 -11  -9  21.356  14.926
  -2  11  -9  29.788  35.576
  -2  11  -9  21.112  18.674
   2 -11   9  13.976  26.156
   2 -11   9  -3.094  21.677
   2  12  -9  30.943  13.027
   2  12  -9  25.630  23.769
  -2 -12   9  48.102  21.536
  -2 -12   9  21.959  21.189
   1  12  -9  59.819  16.197
   1  12  -9  48.949  17.108
  -1 -12   9  32.393  15.067
  -1 -12   9  64.157  17.159
  -1  12   9  60.923  10.922
   1 -12  -9  57.792  11.144
   1 -12  -9  47.037  10.097
   0  12   9  999.51  100.49
   0  12   9  846.66   86.72
   0 -12  -9  881.06   89.00
   0 -12  -9  818.17   83.38
   0  12  -9 1029.93  104.89
   0  12  -9  890.94   91.60
   0 -12   9  743.09   76.97
   0 -12   9 1151.85  116.70
   1  12   9   1.391  12.078
   1  12   9   6.662  12.470
  -1 -12  -9   5.680  12.744
  -1 -12  -9   1.123  11.345
  -1  12  -9   7.442  17.955
  -1  12  -9  12.249  24.192
   1 -12   9  19.020  16.838
   1 -12   9   3.042  29.005
   1  13  -9  37.424  15.439
   1  13  -9  44.701  17.364
  -1 -13   9  34.267  16.915
  -1 -13   9  38.040  16.363
  -1  13   9  34.177  10.138
  -1  13   9  28.941   9.273
   1 -13  -9  27.016  12.873
   0  13   9  327.27   36.05
   0  13   9  306.35   34.70
   0 -13  -9  248.08   27.97
   0 -13  -9  290.05   33.84
   0  13  -9  307.50   36.56
   0  13  -9  298.90   36.28
   0 -13   9  267.85   33.33
   0 -13   9  255.91   32.15
   1  13   9   0.109  17.390
   1  13   9  -5.854  16.376
  -1 -13  -9  -12.39   15.35
  -1 -13  -9  10.517  17.955
  -1  13  -9  -6.705  18.366
  -1  13  -9   9.469  17.416
   1 -13   9  10.473  17.467
   1 -13   9  28.594  20.239
   1  14  -9  18.840  19.302
   1  14  -9  -1.011  14.464
  -1 -14   9  12.885  17.210
  -1 -14   9  11.303  17.287
  -1  14   9  -4.811  14.220
  -1  14   9  -2.450  10.636
   1 -14  -9  -7.621   8.808
   1 -14  -9  -4.895  10.870
   0  14   9  -9.964  13.360
   0  14   9  -2.617  11.565
   0 -14  -9  -0.600  10.896
   0 -14  -9   7.057  11.181
   0  14  -9  24.487  17.429
   0  14  -9  16.338  20.265
   0 -14   9  19.918  19.546
   0 -14   9  -0.497  17.557
   1  14   9  -10.64   12.00
   1  14   9   1.685  14.130
  -1 -14  -9   0.376  11.240
  -1 -14  -9  11.901  15.029
  -1  14  -9  -19.17   17.17
  -1  14  -9  10.283  18.956
   1 -14   9   2.342  18.096
   1 -14   9   6.978  15.273
   1  15  -9  67.597  16.479
   1  15  -9  54.095  20.663
  -1 -15   9  96.679  20.881
  -1 -15   9  83.460  21.728
  -1  15   9  77.210  16.120
  -1  15   9  58.433  13.707
   1 -15  -9  81.676  16.582
   1 -15  -9  35.961  10.895
   0  15   9   0.699  12.911
   0  15   9   2.459  10.882
   0 -15  -9   8.808  13.219
   0 -15  -9   3.567  11.466
   0  15  -9  -6.362  18.340
   0  15  -9  18.571  21.600
   0 -15   9  -4.910  18.455
   0 -15   9  -16.45   21.92
  -2   0  10  59.742   8.144
  -2   0  10  66.455   9.312
   2   0 -10  56.457   9.356
   2   0 -10  59.473   9.709
  -1   0  10  530.30   53.88
  -1   0  10  660.44   66.80
   1   0 -10  836.78   84.36
   1   0 -10  701.64   70.83
   0   0 -10  62.373  13.283
   0   0 -10  33.792  10.539
   0   0  10  46.626  12.191
   0   0  10  50.682  11.558
  -1   0 -10  246.54   27.99
  -1   0 -10  264.51   31.03
   1   0  10  304.42   33.88
   1   0  10  281.32   33.15
  -2   0 -10   2.663  13.591
  -2   0 -10  17.467  13.155
   2   0  10  -11.86   13.36
   2   0  10  21.125  14.746
   2   1 -10  6.8046  6.6737
   2   1 -10  16.620   8.323
  -2  -1  10  13.450   6.325
  -2  -1  10  19.315   5.816
  -2   1  10  11.882   6.604
   2  -1 -10  12.316   6.044
   2  -1 -10  13.758   4.407
   1   1 -10  116.52   18.22
  -1  -1  10  91.648  14.413
  -1  -1  10  130.39   17.03
  -1   1  10  128.85   15.71
  -1   1  10  128.47   15.16
   1  -1 -10  122.98   16.25
   1  -1 -10  136.81   16.71
   0   1  10  43.944  10.551
   0   1  10  48.795  11.389
   0  -1 -10  67.854  11.757
   0  -1 -10  56.919  11.684
   0   1 -10  58.356  12.821
   0  -1  10  47.948  11.922
   0  -1  10  37.180  13.001
   1   1  10  403.12   43.07
   1   1  10  445.34   47.33
  -1  -1 -10  415.82   45.91
  -1  -1 -10  368.08   38.91
  -1   1 -10  384.25   41.30
  -1   1 -10  367.57   39.52
   1  -1  10  439.18   46.68
   1  -1  10  399.01   43.20
   2   1  10  13.630  14.490
   2   1  10   7.072  14.220
  -2  -1 -10  -2.006  12.267
  -2   1 -10  13.874  14.682
  -2   1 -10  -5.970  13.322
   2  -1  10   7.077  15.414
   2  -1  10  -2.346  13.745
   2   2 -10  190.20   21.19
   2   2 -10  198.93   21.93
  -2  -2  10  193.15   21.23
  -2  -2  10  206.88   22.10
  -2   2  10  191.74   20.55
   1   2 -10  70.882  11.734
   1   2 -10  58.074  12.096
  -1  -2  10  67.610  13.835
  -1   2  10  67.777  10.453
  -1   2  10  78.249  10.899
   1  -2 -10  64.812   9.727
   1  -2 -10  67.635  12.258
   0   2  10  13.193   9.175
   0   2  10  19.995  10.127
   0  -2 -10  26.079   9.555
   0  -2 -10  19.777   8.527
   0   2 -10  30.571  15.439
   0   2 -10  19.148  11.716
   0  -2  10  40.479  20.162
   0  -2  10  26.220  11.825
   1   2  10  521.83   55.38
   1   2  10  485.90   50.78
  -1  -2 -10  500.78   52.02
  -1  -2 -10  583.05   60.46
  -1   2 -10  568.93   59.51
  -1   2 -10  487.31   51.23
   1  -2  10  554.82   57.71
   1  -2  10  495.39   52.39
   2   2  10  361.92   42.85
   2   2  10  314.82   35.77
  -2  -2 -10  352.94   42.74
  -2  -2 -10  285.94   32.79
  -2   2 -10  362.69   42.24
   2  -2  10  384.12   44.26
   2  -2  10  314.69   36.73
  -3  -3  10  173.90   22.29
  -3  -3  10  226.39   24.65
   2   3 -10  646.07   65.80
   2   3 -10  608.98   61.74
  -2  -3  10  601.40   61.14
  -2  -3  10  685.85   70.63
   1   3 -10  265.15   29.77
   1   3 -10  223.83   25.06
  -1  -3  10  229.60   25.90
  -1   3  10  344.08   35.74
  -1   3  10  301.09   31.70
   1  -3 -10  328.55   34.49
   0   3  10  373.47   39.25
   0   3  10  336.51   35.55
   0  -3 -10  343.18   36.18
   0  -3 -10  383.35   39.70
   0   3 -10  293.64   32.92
   0   3 -10  299.03   33.57
   0  -3  10  235.76   29.00
   1   3  10  628.48   64.56
   1   3  10  625.53   64.31
  -1  -3 -10  493.73   51.27
  -1  -3 -10  599.22   61.36
  -1   3 -10  621.81   65.53
  -1   3 -10  586.39   61.04
   1  -3  10  604.87   63.44
   1  -3  10  424.68   45.80
   2   3  10  34.305  14.579
   2   3  10  27.375  14.246
  -2  -3 -10  14.695  12.019
  -2  -3 -10   1.933  13.116
  -2   3 -10  13.104  14.374
  -2   3 -10  12.525  15.953
   2  -3  10  10.806  16.171
   2  -3  10  25.155  16.453
   3   4 -10  78.634  13.976
  -3  -4  10  78.544  15.555
  -3  -4  10  59.742  15.080
   2   4 -10  -2.832   9.362
   2   4 -10   3.242  11.610
  -2  -4  10  8.1470  7.5785
  -2  -4  10  -2.895   9.491
   1   4 -10  412.61   44.71
  -1  -4  10  322.13   34.49
  -1  -4  10  351.40   37.49
  -1   4  10  472.42   47.81
  -1   4  10  500.66   50.81
   1  -4 -10  403.50   41.20
   1  -4 -10  498.47   50.95
   0   4  10  19.983   9.460
   0   4  10  21.998   9.211
   0  -4 -10  43.135   8.984
   0  -4 -10  33.433   9.611
   0   4 -10  28.569  13.116
   0   4 -10  32.637  13.771
   0  -4  10  35.858  13.001
   0  -4  10  30.994  13.168
   1   4  10  532.10   55.22
   1   4  10  514.90   53.57
  -1  -4 -10  466.65   48.69
  -1  -4 -10  498.99   51.77
  -1   4 -10  427.50   46.55
  -1   4 -10  417.62   45.20
   1  -4  10  387.72   42.89
   1  -4  10  347.29   39.07
   2   4  10  301.09   37.15
   2   4  10  346.90   38.77
  -2  -4 -10  320.85   35.76
  -2  -4 -10  337.41   39.98
  -2   4 -10  316.49   36.45
  -2   4 -10  344.08   40.52
   2  -4  10  342.41   39.85
   2  -4  10  336.12   39.71
   2   5 -10  402.35   41.83
   2   5 -10  420.44   44.23
  -2  -5  10  448.04   47.28
  -2  -5  10  392.72   41.24
   1   5 -10  360.38   38.96
   1   5 -10  433.53   46.37
  -1  -5  10  383.35   40.47
  -1  -5  10  334.97   36.67
  -1   5  10  436.23   44.23
  -1   5  10  429.94   43.75
   1  -5 -10  425.83   43.62
   1  -5 -10  464.34   47.58
   0   5  10  97.988  13.951
   0   5  10  91.840  16.659
   0  -5 -10  73.398  10.978
   0  -5 -10  80.110  14.900
   0   5 -10  35.191  17.878
   0   5 -10  48.153  14.284
   0  -5  10  55.944  16.607
   1   5  10  30.044  11.720
   1   5  10  22.909  14.310
  -1  -5 -10  15.427  10.845
  -1  -5 -10   0.645  12.824
  -1   5 -10  31.636  15.529
  -1   5 -10   9.049  13.630
   1  -5  10   9.660  15.118
   1  -5  10  -0.872  14.130
   2   5  10  161.20   22.97
   2   5  10  137.84   20.61
  -2  -5 -10  139.12   20.01
  -2  -5 -10  125.26   19.61
  -2   5 -10  94.831  18.879
  -2   5 -10  102.54   22.19
   2  -5  10  80.919  20.663
   2  -5  10  96.448  20.522
   2   6 -10  83.986  13.335
   2   6 -10  82.266  15.350
  -2  -6  10  108.36   16.36
  -2  -6  10  99.900  17.018
   1   6 -10   0.854  10.901
   1   6 -10   6.683  11.639
  -1  -6  10  -4.292  10.682
  -1  -6  10  -5.428  11.209
  -1   6  10  9.0698  5.2774
  -1   6  10  1.5106  5.6123
   1  -6 -10  8.4101  8.0405
   1  -6 -10  13.784   5.846
   0   6  10  11.199  11.272
   0   6  10   4.566  12.645
   0  -6 -10  11.365  11.452
   0  -6 -10  21.985  10.797
   0   6 -10  12.426  13.219
   0   6 -10   3.137  13.694
   0  -6  10   4.118  12.860
   0  -6  10  15.003  12.715
   1   6  10  70.369  14.656
   1   6  10  84.769  14.785
  -1  -6 -10  65.710  12.520
  -1  -6 -10  68.354  12.962
  -1   6 -10  82.651  18.096
  -1   6 -10  41.454  17.480
   1  -6  10  54.724  17.275
   1  -6  10  37.386  14.682
   2   6  10  28.453  14.746
   2   6  10  29.056  14.644
  -2  -6 -10  30.571  13.643
  -2  -6 -10  16.915  12.898
  -2   6 -10   8.695  16.594
  -2   6 -10  67.315  28.543
   2  -6  10  36.025  18.571
   2  -6  10  45.073  23.961
   2   7 -10  17.416  13.270
   2   7 -10  13.874   9.930
  -2  -7  10  37.411  12.747
  -2  -7  10  13.245  13.001
   1   7 -10  62.271  13.861
   1   7 -10  41.800  17.031
  -1  -7  10  53.441  13.412
  -1  -7  10  49.142  13.630
  -1   7  10  88.747  10.929
  -1   7  10  99.092  12.826
   1  -7 -10  75.118  10.876
   0   7  10  11.176   9.468
   0   7  10  -5.496   8.413
   0  -7 -10  3.9401  7.9456
   0  -7 -10  3.2175  8.0636
   0   7 -10  -3.551  17.531
   0   7 -10   0.400  13.925
   0  -7  10  -4.364  15.850
   0  -7  10  -17.45   13.46
   1   7  10  23.987  13.424
   1   7  10  25.270  11.537
  -1  -7 -10  24.295  11.255
  -1  -7 -10  16.633  10.343
  -1   7 -10  -4.052  15.208
  -1   7 -10  10.645  17.454
   1  -7  10  22.511  16.992
   1  -7  10   6.948  14.271
   2   7  10  108.92   19.82
   2   7  10  98.488  27.182
  -2  -7 -10  73.783  16.209
  -2  -7 -10  70.895  17.210
  -2   7 -10  58.010  18.507
  -2   7 -10  61.655  21.625
   2  -7  10  53.813  19.469
   2  -7  10  44.123  17.557
   2   8 -10  34.588  14.015
   2   8 -10  19.970  14.117
  -2  -8  10  46.408  13.899
  -2  -8  10  38.707  18.468
   1   8 -10   9.411  13.514
   1   8 -10  27.324  12.413
  -1  -8  10  10.192  18.019
  -1  -8  10  17.698  12.652
  -1   8  10  32.059   6.651
  -1   8  10  27.953   7.213
   1  -8 -10  16.415   5.990
   1  -8 -10  22.293   6.493
   0   8  10  181.09   21.46
   0  -8 -10  180.32   20.82
   0  -8 -10  151.83   18.08
   0   8 -10  164.66   26.95
   0   8 -10  149.77   22.43
   0  -8  10  138.22   19.97
   0  -8  10  110.53   23.17
   1   8  10  11.104  12.824
  -1  -8 -10  22.075  11.380
  -1   8 -10  22.434  18.366
  -1   8 -10  -2.387  19.328
   1  -8  10  21.471  15.542
   1  -8  10  13.989  15.478
   2   8  10  15.940  20.855
   2   8  10  31.174  16.017
  -2  -8 -10  24.064  15.375
  -2  -8 -10   5.721  18.314
  -2   8 -10  11.784  20.611
  -2   8 -10  32.201  18.648
   2  -8  10  -22.87   17.70
   2  -8  10   0.117  20.124
   2   9 -10  151.31   19.88
   2   9 -10  196.62   25.41
  -2  -9  10  196.10   25.86
  -2  -9  10  147.33   20.71
   1   9 -10  125.27   20.12
   1   9 -10  109.74   17.58
  -1  -9  10  117.53   18.97
  -1  -9  10  133.22   21.74
  -1   9  10  147.72   16.80
  -1   9  10  120.73   14.50
   1  -9 -10  140.66   16.16
   1  -9 -10  147.85   17.02
   0   9  10  20.021   8.971
   0   9  10  44.547  12.212
   0  -9 -10  24.115   8.999
   0  -9 -10  9.7975  8.4705
   0   9 -10  25.848  15.247
   0   9 -10   7.966  17.441
   0  -9  10  13.270  15.362
   0  -9  10  42.609  17.839
   1   9  10  10.950  12.726
   1   9  10  12.704  11.723
  -1  -9 -10   9.614  10.656
  -1  -9 -10  -1.176  10.919
  -1   9 -10  22.152  17.185
  -1   9 -10  29.634  24.924
   1  -9  10  27.953  23.589
   1  -9  10  -0.102  16.633
   2   9  10  18.327  16.684
   2   9  10  34.164  16.736
  -2  -9 -10  10.645  15.157
  -2  -9 -10   3.659  14.207
  -2   9 -10   2.700  17.364
  -2   9 -10  16.222  23.486
   2  -9  10  42.943  20.663
   2  -9  10  -5.895  18.006
   2  10 -10  14.374  11.644
   2  10 -10  -7.238  15.273
  -2 -10  10  -8.950  12.204
  -2 -10  10  17.685  15.350
  -1 -10  10  25.155  17.198
  -1 -10  10   1.670  21.215
  -1  10  10  22.344   7.586
  -1  10  10  27.182  11.172
   1 -10 -10  20.021   7.707
   1 -10 -10  28.979   8.401
   0  10  10  43.674  12.416
   0  10  10  33.766  10.084
   0 -10 -10  45.022  10.583
   0 -10 -10  36.808  10.411
   0  10 -10  25.989  16.710
   0  10 -10  32.521  15.414
   0 -10  10  19.546  15.388
   0 -10  10  38.566  17.018
   1  10  10  23.858  13.514
   1  10  10  10.369  11.040
  -1 -10 -10  31.726  12.033
  -1 -10 -10  16.890  11.519
  -1  10 -10  12.812  17.416
  -1  10 -10  21.061  18.712
   1 -10  10  31.726  17.775
   1 -10  10  -2.963  16.979
   2  10  10  -1.109  14.695
   2  10  10   6.878  22.511
  -2 -10 -10  32.598  25.424
  -2 -10 -10  16.697  13.373
  -2  10 -10   6.090  21.305
  -2  10 -10   7.496  24.949
   2 -10  10  -4.040  29.108
   2 -10  10   6.782  22.460
   2  11 -10   8.372  12.761
   2  11 -10  31.135  23.396
  -2 -11  10   4.183  13.976
  -2 -11  10  11.189  26.515
   1  11 -10  204.70   28.59
   1  11 -10  211.38   26.87
  -1 -11  10  222.03   28.31
  -1 -11  10  156.45   22.72
  -1  11  10  198.54   22.43
   1 -11 -10  226.52   24.74
   1 -11 -10  219.21   25.00
   0  11  10  770.04   78.48
   0  11  10 1176.11  118.37
   0 -11 -10  784.54   79.33
   0 -11 -10 1004.14  101.44
   0  11 -10  864.63   88.88
   0  11 -10  681.49   74.42
   0 -11  10  789.04   81.55
   0 -11  10  858.08   89.57
   1  11  10 1554.20  155.42
   1  11  10 1672.28  167.36
  -1 -11 -10 1488.75  148.87
  -1 -11 -10 1473.35  147.46
  -1  11 -10 1097.82  112.93
  -1  11 -10 1425.86  144.77
   1 -11  10 1178.93  120.50
   1 -11  10 1129.27  115.30
   1  12 -10  448.16   49.62
   1  12 -10  558.02   60.24
  -1 -12  10  503.09   55.71
  -1 -12  10  452.01   49.00
  -1  12  10  506.43   52.25
   1 -12 -10  578.43   59.20
   1 -12 -10  560.72   57.20
   0  12  10  27.247  13.014
   0  12  10  34.549  12.847
   0 -12 -10  29.531  11.222
   0  12 -10  19.302  16.594
   0  12 -10  16.902  17.685
   0 -12  10  20.907  16.928
   0 -12  10  18.443  15.953
   1  12  10  55.084  14.554
  -1 -12 -10  57.368  19.572
  -1  12 -10  70.382  21.382
  -1  12 -10  24.783  19.392
   1 -12  10  57.920  20.958
   1 -12  10  33.766  18.263
   1  13 -10  111.59   18.89
   1  13 -10  102.61   22.63
  -1 -13  10  98.039  19.315
  -1 -13  10  72.705  18.340
  -1  13  10  82.844  13.193
  -1  13  10  98.681  15.491
   1 -13 -10  103.98   16.12
   1 -13 -10  76.363  12.255
   0  13  10  418.52   44.30
   0  13  10  434.05   46.02
   0 -13 -10  385.41   41.25
   0 -13 -10  385.92   40.70
   0  13 -10  398.63   46.34
   0  13 -10  261.56   33.12
   0 -13  10  383.35   44.48
   0 -13  10  315.72   38.54
   1  13  10  282.86   33.07
   1  13  10  268.62   30.66
  -1 -13 -10  289.41   33.50
  -1 -13 -10  286.33   31.42
  -1  13 -10  217.67   31.69
  -1  13 -10  187.38   28.63
   1 -13  10  218.82   29.58
   1 -13  10  191.10   30.56
   1  14 -10  -9.984  19.533
   1  14 -10  22.768  24.500
  -1 -14  10  -11.86   17.35
  -1  14  10   8.130  11.083
  -1  14  10   9.081  15.555
   1 -14 -10   4.016  14.605
   1 -14 -10   4.195  12.412
   0  14  10  184.43   23.45
   0  14  10  160.68   20.47
   0 -14 -10  124.61   17.35
   0 -14 -10  155.68   20.97
   0  14 -10  139.12   25.37
   0  14 -10  202.01   38.91
   0 -14  10  66.031  37.950
   0 -14  10  199.57   30.25
   0  15  10  164.66   21.84
   0  15  10  193.92   26.09
   0 -15 -10  212.28   26.76
   0 -15 -10  186.48   23.36
   0  15 -10  228.70   40.04
   0 -15  10  200.21   35.41
  -2   0  11  5.6714  7.9045
   2   0 -11 -0.7092  8.1753
  -1   0  11  -7.622   9.325
  -1   0  11   4.922  10.795
   1   0 -11  -7.310  12.197
   1   0 -11  15.221  10.764
   0   0 -11  5.0656  9.9708
   0   0 -11   8.535  12.094
   0   0  11   9.626  11.752
   0   0  11  12.331   9.926
  -1   0 -11   0.048  11.343
  -1   0 -11  13.797  17.287
   1   0  11   9.180  12.484
  -2   0 -11  -2.052  13.655
  -2   0 -11  12.123  14.528
   2   0  11  -10.52   14.66
   2   0  11  -22.59   15.70
   2   1 -11  71.909  12.367
   2   1 -11  60.038  11.825
  -2  -1  11  62.322   9.881
  -2  -1  11  62.617  12.120
  -2   1  11  69.637  10.387
   2  -1 -11  55.969   9.269
   2  -1 -11  76.273  11.223
   1   1 -11  87.002  15.491
   1   1 -11  74.720  12.585
  -1  -1  11  59.101  14.117
  -1  -1  11  67.289  12.962
  -1   1  11  59.986  10.747
  -1   1  11  61.039   9.764
   1  -1 -11  64.517  10.541
   1  -1 -11  57.240  10.634
   0   1  11  109.56   15.18
   0   1  11  80.431  14.169
   0  -1 -11  88.311  13.578
   0  -1 -11  122.06   16.71
   0   1 -11  86.270  15.516
   0   1 -11  95.306  16.363
   0  -1  11  98.784  15.427
   0  -1  11  73.693  15.337
   1   1  11   4.777  12.796
   1   1  11  21.895  11.691
  -1  -1 -11  10.501  11.752
  -1  -1 -11   8.870  10.788
  -1   1 -11  14.130  13.078
  -1   1 -11   4.568  11.848
   1  -1  11  14.836  12.784
   1  -1  11   6.294  13.886
   2   1  11  -0.051  15.285
  -2  -1 -11  17.980  14.785
  -2   1 -11  -1.754  13.668
  -2   1 -11  11.409  15.478
   2  -1  11   7.827  16.761
   2  -1  11  23.037  15.362
   2   2 -11  181.47   21.33
   2   2 -11  211.25   25.24
  -2  -2  11  181.22   21.21
  -2  -2  11  170.56   20.80
  -2   2  11  166.97   18.72
   1   2 -11  36.372  10.302
   1   2 -11  27.953  10.846
  -1  -2  11  34.690   9.814
  -1  -2  11  27.337  10.018
  -1   2  11  36.192   8.687
  -1   2  11  28.132   8.435
   1  -2 -11  33.689   8.800
   1  -2 -11  50.669   9.926
   0   2  11  300.70   32.74
   0   2  11  325.60   34.95
   0  -2 -11  320.34   34.25
   0  -2 -11  349.73   36.85
   0   2 -11  327.65   38.73
   0   2 -11  339.97   37.18
   0  -2  11  308.27   35.49
   0  -2  11  221.77   27.04
   1   2  11  32.829  13.373
   1   2  11  29.018  15.016
  -1  -2 -11   0.228  10.406
  -1  -2 -11  16.479  14.977
  -1   2 -11  16.517  14.028
  -1   2 -11  20.380  14.964
   1  -2  11  25.835  14.926
   1  -2  11  13.001  12.668
   2   2  11  28.774  15.914
   2   2  11  52.312  16.633
  -2  -2 -11  35.602  14.528
  -2  -2 -11  36.680  13.951
  -2   2 -11  40.889  17.390
  -2   2 -11  29.993  14.271
   2  -2  11  21.022  17.056
   2  -2  11  25.796  16.197
   2   3 -11  10.765   9.500
   2   3 -11  18.584  12.257
  -2  -3  11  1.8815  7.8159
  -2  -3  11  16.145   9.556
  -2   3  11  7.5734  5.5584
   1   3 -11   5.678  10.204
   1   3 -11  17.223  10.987
  -1  -3  11  7.0780  9.9400
  -1  -3  11  6.5158  9.3201
  -1   3  11  18.378   8.631
  -1   3  11  15.221   8.780
   1  -3 -11  7.3308  9.5485
   1  -3 -11  20.765   8.261
   0   3  11  78.685  15.491
   0   3  11  104.85   15.00
   0  -3 -11  81.701  15.170
   0  -3 -11  88.568  13.797
   0   3 -11  43.507  18.635
   0   3 -11  74.232  16.145
   0  -3  11  65.505  14.451
   0  -3  11  79.918  20.676
   1   3  11 1091.02  110.09
   1   3  11 1128.63  113.43
  -1  -3 -11  901.59   91.12
  -1  -3 -11  923.79   93.16
  -1   3 -11  932.65   95.54
  -1   3 -11 1014.40  103.15
   1  -3  11 1016.46  102.84
   1  -3  11  889.27   91.07
   2   3  11  93.047  23.294
   2   3  11  92.136  19.161
  -2  -3 -11  78.968  17.044
  -2  -3 -11  106.72   26.46
  -2   3 -11  106.51   27.41
  -2   3 -11  92.328  18.199
   2  -3  11  87.105  20.573
   2  -3  11  74.810  20.688
   2   4 -11 1423.29  142.33
   2   4 -11 1319.34  131.81
  -2  -4  11 1271.85  126.99
  -2  -4  11 1483.61  148.10
  -1  -4  11  442.26   47.14
  -1  -4  11  426.22   45.03
  -1   4  11  538.13   54.44
   1  -4 -11  614.88   62.12
   1  -4 -11  475.76   48.31
   0   4  11  524.53   54.02
   0   4  11  562.26   57.64
   0  -4 -11  451.37   46.70
   0  -4 -11  492.31   50.53
   0   4 -11  464.72   49.77
   0   4 -11  361.92   39.84
   0  -4  11  378.22   41.27
   0  -4  11  408.89   43.91
   1   4  11  22.716  12.680
   1   4  11  10.977  11.834
  -1  -4 -11  17.595  10.863
  -1  -4 -11  16.312  10.997
  -1   4 -11  -2.856  16.954
  -1   4 -11  33.677  15.080
   1  -4  11  14.592  13.899
   1  -4  11  18.378  16.646
   2   4  11  177.11   28.52
   2   4  11  165.43   23.92
  -2  -4 -11  167.10   27.29
  -2  -4 -11  153.50   21.86
  -2   4 -11  149.52   27.17
  -2   4 -11  226.52   31.11
   2  -4  11  150.29   24.14
   2  -4  11  120.31   29.61
   2   5 -11   6.812  12.172
   2   5 -11 -0.1778  9.8873
  -2  -5  11  5.6200  9.8168
  -2  -5  11   4.140  10.933
   1   5 -11  14.862  11.956
   1   5 -11   9.840  12.111
  -1  -5  11   8.713  14.708
  -1  -5  11  3.5499  9.9246
  -1   5  11  8.1278  8.7798
  -1   5  11 -0.2414  8.7040
   1  -5 -11  4.5022  6.6942
   1  -5 -11  4.4791  8.0944
   0   5  11  31.841  10.452
   0   5  11  42.532  13.270
   0  -5 -11  37.989  10.162
   0  -5 -11  35.191   9.570
   0   5 -11  32.778  15.067
   0   5 -11  21.394  14.605
   0  -5  11  28.299  14.785
   0  -5  11  37.796  14.297
   1   5  11  174.29   22.68
   1   5  11  138.22   19.64
  -1  -5 -11  142.07   19.14
  -1  -5 -11  154.01   20.26
  -1   5 -11  102.88   21.00
  -1   5 -11  105.53   23.77
   1  -5  11  108.67   23.74
   1  -5  11  120.32   24.71
   2   5  11   2.788  16.325
   2   5  11  15.735  15.606
  -2  -5 -11   5.580  14.297
  -2  -5 -11  20.316  15.350
  -2   5 -11   6.402  15.876
  -2   5 -11  -14.84   18.43
   2  -5  11   3.986  18.455
   2  -5  11   5.635  17.275
   2   6 -11  46.985  16.646
  -2  -6  11  51.542  14.143
  -2  -6  11  51.477  17.082
   1   6 -11  84.101  16.633
   1   6 -11  60.487  14.028
  -1  -6  11  61.988  13.707
   1  -6 -11  109.60   13.51
   0   6  11  139.25   18.25
   0   6  11  144.00   20.84
   0  -6 -11  136.55   16.72
   0  -6 -11  108.42   17.01
   0   6 -11  89.068  19.444
   0   6 -11  81.766  18.083
   1   6  11  32.124  12.898
   1   6  11  42.532  13.963
  -1  -6 -11  35.063  11.950
  -1  -6 -11  34.254  13.861
  -1   6 -11  18.635  18.327
  -1   6 -11   1.472  14.977
   1  -6  11  39.375  15.914
   1  -6  11   6.956  16.158
   2   6  11  49.706  17.210
   2   6  11  48.911  17.762
  -2  -6 -11  32.740  15.760
  -2  -6 -11  34.164  15.016
  -2   6 -11  45.317  20.124
   2  -6  11  13.489  21.073
   2   7 -11  34.729  13.578
   2   7 -11  30.237  11.108
  -2  -7  11  51.567  14.143
  -2  -7  11  41.595  14.836
   1   7 -11  113.57   20.23
   1   7 -11  106.29   24.54
  -1  -7  11  109.26   17.90
  -1   7  11  173.64   19.64
  -1   7  11  173.13   19.03
   1  -7 -11  159.53   17.84
   1  -7 -11  176.72   20.55
   0   7  11  214.71   25.03
   0   7  11  258.35   31.38
   0  -7 -11  196.23   22.10
   0   7 -11  179.55   26.21
   0   7 -11  181.60   24.89
   0  -7  11  175.31   25.01
   1   7  11  378.86   41.34
  -1  -7 -11  385.41   41.07
  -1  -7 -11  292.23   33.96
  -1   7 -11  269.64   33.28
  -1   7 -11  279.14   35.11
   1  -7  11  265.54   32.65
   1  -7  11  256.94   32.97
   2   7  11  39.747  22.434
   2   7  11  17.403  17.326
  -2  -7 -11  44.688  21.497
  -2  -7 -11  27.465  20.714
  -2   7 -11  15.773  18.661
  -2   7 -11  27.888  19.739
   2  -7  11  19.726  16.517
   2  -7  11  25.848  18.532
   2   8 -11  80.739  14.759
   2   8 -11  91.353  17.647
  -2  -8  11  90.685  20.573
  -2  -8  11  100.52   18.66
   1   8 -11  11.892  12.950
   1   8 -11   1.956  14.490
  -1  -8  11  18.250  13.412
  -1  -8  11  15.311  14.284
  -1   8  11  31.559   8.164
  -1   8  11  13.617   8.736
   1  -8 -11  32.496   9.310
   1  -8 -11  25.155   7.404
   0   8  11  12.726  10.596
   0  -8 -11  34.318  14.605
   0  -8 -11  21.510   8.778
   0   8 -11   2.754  14.554
   0   8 -11  13.129  16.646
   0  -8  11  16.402  15.478
   0  -8  11  14.939  16.376
   1   8  11   0.054  16.055
   1   8  11   2.587  12.041
  -1  -8 -11  12.132  14.721
  -1  -8 -11  13.630  11.370
  -1   8 -11  -1.021  18.353
  -1   8 -11  -9.862  17.210
   1  -8  11   5.474  16.120
   1  -8  11   6.015  16.479
   2   8  11  -4.206  16.556
   2   8  11  14.400  15.824
  -2  -8 -11  -1.273  13.784
  -2  -8 -11   2.269  16.197
  -2   8 -11  -5.380  22.075
   2  -8  11  15.889  16.877
   2  -8  11  -12.45   18.30
   2   9 -11  132.58   18.53
   2   9 -11  170.82   24.63
  -2  -9  11  140.02   27.38
  -2  -9  11  124.17   19.49
   1   9 -11  131.55   22.22
   1   9 -11  103.52   18.60
  -1  -9  11  140.02   21.93
  -1  -9  11  165.30   24.35
  -1   9  11  166.59   19.17
   1  -9 -11  157.22   18.33
   1  -9 -11  126.00   16.86
   0   9  11  440.59   46.59
   0   9  11  408.64   43.66
   0  -9 -11  402.73   42.62
   0  -9 -11  351.40   37.85
   0   9 -11  323.03   38.82
   0   9 -11  349.21   39.73
   0  -9  11  344.98   39.43
   1   9  11  -2.471  11.385
   1   9  11  13.193  13.707
  -1  -9 -11   1.267  11.494
  -1  -9 -11  14.759  11.665
  -1   9 -11  25.168  23.114
  -1   9 -11  -8.382  17.839
   1  -9  11  16.825  20.894
   1  -9  11  20.355  23.627
   2  10 -11  177.88   25.63
   2  10 -11  128.47   19.46
  -2 -10  11  159.53   22.24
  -2 -10  11  106.70   21.37
   1  10 -11  51.041  24.025
  -1 -10  11  45.997  17.724
  -1 -10  11  93.522  24.949
   1 -10 -11  78.955  11.560
   1 -10 -11  106.00   15.63
   0  10  11  743.73   76.32
   0  10  11  798.79   80.97
   0 -10 -11  620.91   63.35
   0 -10 -11  643.37   65.59
   0  10 -11  577.15   61.39
   0  10 -11  533.25   57.59
   0 -10  11  596.91   63.05
   1  10  11  123.14   18.30
   1  10  11  125.93   20.16
  -1 -10 -11  134.12   18.80
  -1 -10 -11  100.73   16.72
  -1  10 -11  50.207  20.842
  -1  10 -11  101.66   22.96
   1 -10  11  88.966  22.883
   1  11 -11  53.171  15.645
   1  11 -11  47.037  19.559
  -1 -11  11  19.213  16.582
  -1 -11  11  49.873  17.711
  -1  11  11  50.515   9.660
   1 -11 -11  59.345  11.291
   1 -11 -11  60.320  10.668
   0  11  11  12.962  12.059
   0  11  11  0.0864  9.5768
   0 -11 -11  8.9620  9.9130
   0 -11 -11  -1.367   9.579
   0  11 -11  -3.298  17.467
   0  11 -11  -0.525  17.672
   0 -11  11  11.041  16.633
   0 -11  11  -5.591  16.659
   1  11  11  48.680  13.745
  -1 -11 -11  49.206  14.220
  -1  11 -11  36.012  21.856
  -1  11 -11  39.375  22.203
   1 -11  11   6.669  22.819
   1 -11  11  24.346  19.161
   1  12 -11  87.361  16.582
   1  12 -11  85.680  22.293
  -1 -12  11  85.398  20.278
  -1 -12  11  69.483  18.622
  -1  12  11  115.88   18.20
   1 -12 -11  109.49   16.27
   1 -12 -11  98.873  14.810
   0  12  11   3.876  10.316
   0 -12 -11   4.089  16.222
   0 -12 -11  12.529  10.881
   0  12 -11  33.805  34.549
   0  12 -11  18.879  17.570
   0 -12  11  33.638  25.245
   0 -12  11   1.630  17.339
   1  12  11  411.84   44.59
   1  12  11  413.64   44.57
  -1 -12 -11  346.52   38.39
  -1 -12 -11  380.66   40.53
  -1  12 -11  414.15   49.35
  -1  12 -11  277.09   41.16
   1 -12  11  373.86   46.86
   1 -12  11  308.66   43.02
   1  13 -11  -1.251  19.046
   1  13 -11  21.176  14.733
  -1 -13  11  -8.409  15.401
  -1 -13  11  15.183  17.698
  -1  13  11   0.528  10.397
   1 -13 -11  16.671  17.903
   1 -13 -11  2.6669  8.7066
   0  13  11  28.440  11.734
   0  13  11  38.438  14.425
   0 -13 -11  17.942  10.673
   0 -13 -11  13.104  12.136
   0  13 -11   7.281  23.127
   0  13 -11  22.241  22.934
   0 -13  11   8.939  19.610
   0 -13  11  32.085  21.446
   0  14  11  15.542  14.361
   0  14  11   0.305  12.448
   0 -14 -11  28.671  12.168
   0 -14 -11  -0.221  13.489
   0  14 -11  22.575  22.164
   0 -14  11  16.068  21.292
  -2   0  12  882.47   88.41
   2   0 -12  788.78   79.12
  -1   0  12  17.339  11.003
  -1   0  12  3.0057  8.1137
   1   0 -12   3.354  10.145
   1   0 -12  2.7568  9.7410
   0   0 -12  500.78   52.29
   0   0 -12  443.67   46.51
   0   0  12  367.31   39.04
   0   0  12  483.84   52.36
  -1   0 -12  123.48   19.65
  -1   0 -12  130.78   18.96
   1   0  12  104.88   19.34
   1   0  12  126.53   20.23
  -2   0 -12  49.398  18.006
  -2   0 -12  60.127  17.660
   2   0  12  52.748  19.020
   2   0  12  72.410  20.611
   2   1 -12  32.124  15.337
  -2  -1  12  17.903   8.812
  -2   1  12  18.802   9.225
   2  -1 -12  22.960   6.403
   1   1 -12  -3.279   9.963
   1   1 -12  19.264  15.876
  -1  -1  12   4.352  10.276
  -1  -1  12  -11.59    8.85
  -1   1  12  -1.964   6.896
  -1   1  12  1.1236  9.8193
   1  -1 -12  3.1970  7.8454
   1  -1 -12  1.5632  9.5639
   0   1  12  251.16   29.93
   0   1  12  207.01   25.69
   0  -1 -12  221.26   27.34
   0  -1 -12  242.31   27.84
   0   1 -12  232.42   28.02
   0   1 -12  254.37   30.06
   0  -1  12  243.46   29.08
   0  -1  12  187.38   22.95
   1   1  12  47.050  14.117
   1   1  12  43.507  14.926
  -1  -1 -12  50.913  13.155
  -1  -1 -12  75.541  15.427
  -1   1 -12  54.943  15.953
  -1   1 -12  56.611  14.413
   1  -1  12  58.215  16.671
   1  -1  12  66.942  16.954
   2   1  12  36.295  18.173
   2   1  12  81.265  32.303
  -2  -1 -12  56.611  17.865
  -2  -1 -12  13.219  16.505
  -2   1 -12  29.813  23.088
  -2   1 -12  19.277  22.062
   2  -1  12  37.937  23.974
   2  -1  12  29.428  18.712
   2   2 -12  -2.482   9.212
   2   2 -12  11.494  10.491
  -2  -2  12  10.098   9.415
  -2   2  12  4.2802  7.9610
   2  -2 -12  11.952   5.426
   1   2 -12  892.48   90.24
   1   2 -12  948.69   95.56
  -1  -2  12  762.21   77.52
  -1  -2  12  740.01   74.94
  -1   2  12  854.36   86.09
  -1   2  12  834.21   84.41
   1  -2 -12  964.86   96.77
   1  -2 -12  751.69   75.80
   0   2  12  20.547  11.877
   0  -2 -12   2.249  16.299
   0  -2 -12   7.922  10.111
   0   2 -12   1.639  14.297
   0   2 -12   2.001  13.489
   0  -2  12  10.728  11.502
   0  -2  12   7.629  12.715
   1   2  12  50.784  18.853
   1   2  12  34.074  14.708
  -1  -2 -12  24.205  15.581
  -1  -2 -12  42.956  15.966
  -1   2 -12  30.635  13.668
  -1   2 -12  43.713  15.978
   1  -2  12  38.040  16.646
   1  -2  12  38.361  15.593
   2   2  12  93.637  21.471
   2   2  12  93.894  25.809
  -2  -2 -12  85.205  24.718
  -2  -2 -12  83.088  19.367
  -2   2 -12  78.711  18.840
  -2   2 -12  104.96   21.48
   2  -2  12  61.501  19.379
   2  -2  12  89.043  21.805
   2   3 -12  306.86   33.15
   2   3 -12  399.65   41.94
  -2  -3  12  338.18   37.78
  -2   3  12  324.06   34.09
   1   3 -12 2156.12  214.46
   1   3 -12 1945.64  193.67
  -1  -3  12 2025.21  201.24
  -1   3  12 1826.28  181.73
  -1   3  12 2373.01  235.25
   1  -3 -12 2396.11  237.69
   1  -3 -12 2216.44  219.72
   0   3  12  759.90   77.67
   0   3  12  752.72   76.79
   0  -3 -12  759.13   76.81
   0  -3 -12  733.85   74.98
   0   3 -12  666.98   69.16
   0   3 -12  686.11   71.54
   0  -3  12  674.30   69.27
   0  -3  12  589.85   61.90
   1   3  12  -3.590  13.424
   1   3  12   1.052  12.825
  -1  -3 -12  11.834  11.316
  -1  -3 -12  16.171  11.352
  -1   3 -12  25.565  15.465
  -1   3 -12  14.990  17.287
   1  -3  12  23.743  15.196
   1  -3  12  -13.60   16.04
   2   3  12  25.886  18.815
   2   3  12  42.737  18.212
  -2  -3 -12  10.718  16.594
  -2  -3 -12  47.512  16.505
  -2   3 -12  30.019  19.739
  -2   3 -12  41.685  17.518
   2  -3  12  42.763  20.483
   2  -3  12  53.287  20.060
   2   4 -12  116.23   19.15
   2   4 -12  158.76   19.84
  -2  -4  12  140.28   19.03
  -2  -4  12  136.94   18.20
  -2   4  12  150.93   17.18
   1   4 -12  -0.314  15.401
   1   4 -12   4.862  11.649
  -1  -4  12   3.021  10.544
  -1  -4  12   9.387  11.925
  -1   4  12 -0.3292  7.1306
  -1   4  12  1.2464  8.7721
   1  -4 -12  10.944   7.273
   1  -4 -12  19.726  10.239
   0   4  12  295.95   34.55
   0  -4 -12  222.54   24.74
   0   4 -12  226.91   31.49
   0   4 -12  280.55   36.59
   0  -4  12  205.34   31.12
   0  -4  12  223.18   29.24
   1   4  12  12.937  12.975
   1   4  12   2.295  13.155
  -1  -4 -12  -3.867  11.227
  -1  -4 -12  10.542  11.317
  -1   4 -12   3.143  21.754
  -1   4 -12  -1.806  17.210
   1  -4  12   2.630  15.966
   2   4  12  122.65   27.13
   2   4  12  90.814  26.900
  -2  -4 -12  73.513  24.166
  -2   4 -12  83.550  19.046
  -2   4 -12  97.346  22.832
   2  -4  12  76.991  20.663
   2  -4  12  105.24   23.36
   2   5 -12  21.805  11.599
   2   5 -12  49.334  12.408
  -2  -5  12  51.067  12.299
  -2  -5  12  42.635  13.104
   1   5 -12  295.31   35.00
  -1  -5  12  265.79   30.20
  -1   5  12  368.47   38.59
  -1   5  12  404.79   42.21
   1  -5 -12  415.69   42.94
   1  -5 -12  339.59   35.82
   0   5  12  250.78   28.35
   0   5  12  266.05   30.90
   0  -5 -12  237.56   26.12
   0  -5 -12  255.14   28.43
   0   5 -12  200.08   26.39
   0   5 -12  180.19   25.54
   0  -5  12  208.04   27.70
   0  -5  12  181.22   24.33
   1   5  12  86.732  16.402
   1   5  12  52.466  15.273
  -1  -5 -12  84.024  14.952
  -1  -5 -12  79.494  14.849
  -1   5 -12  72.166  26.053
  -1   5 -12  50.091  16.915
   1  -5  12  72.153  18.289
   1  -5  12  32.945  23.011
   2   5  12  32.675  20.098
   2   5  12  31.225  17.159
  -2  -5 -12  21.330  16.068
  -2  -5 -12  24.808  14.939
  -2   5 -12   6.937  16.941
  -2   5 -12  15.350  19.469
   2  -5  12  29.890  18.635
   2  -5  12  61.283  21.009
   2   6 -12   1.978  17.300
   2   6 -12  29.082  12.719
  -2  -6  12  20.509  12.937
  -2  -6  12  12.032  16.659
   1   6 -12  271.95   31.55
   1   6 -12  235.76   28.20
  -1  -6  12  313.79   35.86
  -1   6  12  346.01   36.44
  -1   6  12  328.68   34.23
   1  -6 -12  383.22   39.82
   1  -6 -12  291.97   30.74
   0   6  12  12.826  14.554
   0   6  12  14.156  10.719
   0  -6 -12  15.632   8.882
   0  -6 -12  25.514  13.874
   0   6 -12  16.967  16.389
   0   6 -12  -20.30   15.04
   0  -6  12   0.442  15.144
   0  -6  12  11.819  15.144
   1   6  12  59.884  14.772
   1   6  12  60.500  15.080
  -1  -6 -12  49.873  12.988
  -1  -6 -12  64.478  13.886
  -1   6 -12  66.455  19.829
  -1   6 -12  33.882  21.138
   1  -6  12  47.435  18.622
   1  -6  12  35.525  22.126
   2   6  12  -6.543  18.083
  -2  -6 -12  -6.557  17.044
  -2  -6 -12  15.542  17.018
  -2   6 -12  19.713  18.686
  -2   6 -12  10.163  17.262
   2  -6  12  17.300  16.915
   2  -6  12  16.620  19.187
   2   7 -12  15.824  20.085
   2   7 -12  29.647  15.106
  -2  -7  12  10.414  18.635
  -2  -7  12  12.319  12.594
   1   7 -12   3.786  20.175
   1   7 -12  -5.730  14.374
  -1  -7  12   2.646  22.832
  -1  -7  12  28.915  22.075
  -1   7  12  14.964   7.140
   1  -7 -12  5.1067  7.0805
   1  -7 -12  11.244   8.137
   0   7  12  54.827  15.221
   0   7  12  38.720  14.810
   0  -7 -12  31.931  12.703
   0  -7 -12  20.496  10.086
   0   7 -12  13.014  20.470
   0   7 -12  30.571  16.171
   0  -7  12  19.970  16.620
   0  -7  12   6.293  16.184
   1   7  12  13.335  13.116
   1   7  12   9.087  18.019
  -1  -7 -12  -3.699  21.086
  -1  -7 -12  -8.377  11.271
  -1   7 -12  11.471  19.290
  -1   7 -12   7.649  17.133
   1  -7  12  13.052  17.814
   1  -7  12   5.610  17.749
   2   8 -12   7.725  15.747
   2   8 -12  -1.259  11.753
  -2  -8  12  30.994  16.736
  -2  -8  12   6.156  18.455
   1   8 -12  27.722  14.746
   1   8 -12  57.009  19.046
  -1  -8  12  40.748  14.554
  -1  -8  12  22.293  14.823
  -1   8  12  46.677   9.925
  -1   8  12  60.333  10.303
   1  -8 -12  42.891  12.059
   1  -8 -12  46.523   8.866
   0   8  12  175.06   21.41
   0   8  12  186.86   22.95
   0  -8 -12  163.76   19.65
   0  -8 -12  169.15   20.39
   0   8 -12  135.53   23.37
   0   8 -12  122.50   27.16
   0  -8  12  103.07   25.44
   0  -8  12  124.19   21.60
  -1  -8 -12  164.79   21.12
  -1  -8 -12  202.78   24.65
  -1   8 -12  99.130  28.658
  -1   8 -12  150.54   26.43
   1  -8  12  108.55   22.31
   1  -8  12  111.91   30.51
   2   9 -12  11.629  16.055
   2   9 -12   7.539  13.052
  -2  -9  12  18.571  18.147
  -2  -9  12   8.067  13.938
   1   9 -12  132.83   35.05
  -1  -9  12  76.440  26.772
  -1  -9  12  69.727  16.761
  -1   9  12  84.178  12.233
   1  -9 -12  73.655  11.864
   1  -9 -12  70.870  10.573
   0   9  12  55.379  13.091
   0   9  12  60.281  11.981
   0  -9 -12  42.814  13.206
   0  -9 -12  35.114  10.759
   0   9 -12  16.787  17.236
   0   9 -12  23.011  19.200
   0  -9  12  36.731  17.737
   0  -9  12  45.073  17.005
   1   9  12  34.857  13.104
   1   9  12  42.981  15.273
  -1  -9 -12  42.211  12.055
  -1  -9 -12  30.969  13.219
  -1   9 -12  34.280  21.600
  -1   9 -12  47.037  25.617
   1  -9  12   3.800  25.527
   1  -9  12  17.724  20.663
   1  10 -12  69.419  16.492
  -1 -10  12  24.770  15.991
  -1 -10  12  65.171  20.265
  -1  10  12  74.656  14.323
   1 -10 -12  78.750  13.296
   1 -10 -12  67.905  12.244
   0  10  12  12.860  10.131
   0  10  12   5.018  11.667
   0 -10 -12  5.9422  9.1802
   0 -10 -12  -4.648   9.523
   0  10 -12   6.008  18.109
   0  10 -12  17.493  18.340
   0 -10  12   1.431  18.314
   0 -10  12  17.133  21.856
   1  10  12  10.533  12.819
   1  10  12  14.246  13.745
  -1 -10 -12  -4.958  13.219
  -1 -10 -12   5.506  12.281
  -1  10 -12  -2.188  21.767
  -1  10 -12   2.947  21.420
   1 -10  12  -5.318  22.986
   1 -10  12   0.104  20.098
   1  11 -12   7.297  19.636
  -1 -11  12  -2.379  16.646
  -1 -11  12  -0.541  22.768
  -1  11  12  5.6277  8.7259
   1 -11 -12  18.083   8.415
   1 -11 -12  13.142  10.471
   0  11  12  166.46   20.38
   0  11  12  224.85   27.59
   0 -11 -12  178.52   21.19
   0 -11 -12  171.46   21.30
   0  11 -12  152.85   25.01
   0  11 -12  197.77   38.73
   0 -11  12  168.13   37.37
   0 -11  12  145.02   25.05
   1  11  12  320.59   38.36
   1  11  12  365.13   40.84
  -1 -11 -12  403.37   45.74
  -1 -11 -12  313.15   34.15
  -1  11 -12  311.48   39.72
   1 -11  12  237.17   31.26
   1  12 -12  142.20   24.81
   1  12 -12  94.240  18.250
  -1 -12  12  102.71   20.87
  -1 -12  12  72.243  21.125
   1 -12 -12  123.01   18.71
   0  12  12  482.82   50.22
   0  12  12  518.75   56.96
   0 -12 -12  403.12   43.06
   0 -12 -12  398.24   42.88
   0  12 -12  455.87   53.49
   0  12 -12  337.66   40.54
   0 -12  12  353.32   41.61
   0 -12  12  301.09   37.95
  -2   0  13   3.727  11.700
   2   0 -13  4.5984  9.2752
   2   0 -13  11.748  11.818
  -1   0  13  5.8228  9.3919
  -1   0  13  12.504  12.330
   1   0 -13   7.174  10.737
   0   0 -13  18.751  12.042
   0   0 -13   3.025  12.710
   0   0  13  21.253  11.750
   0   0  13   9.391  13.566
  -1   0 -13  13.848  18.789
  -1   0 -13  17.955  13.129
   1   0  13  29.120  21.767
   1   0  13  10.148  15.568
  -2   0 -13  -14.50   18.46
  -2   0 -13   4.563  17.185
   2   0  13  -0.155  16.787
   2   0  13  -13.81   19.07
   2   1 -13  26.323  12.454
  -2  -1  13  37.565  14.554
  -2   1  13  46.652   9.709
   2  -1 -13  53.890  10.958
   1   1 -13  83.704  18.199
   1   1 -13  32.675  13.976
  -1  -1  13  51.619  12.182
  -1  -1  13  48.397  12.962
  -1   1  13  83.165  17.185
  -1   1  13  56.791  12.416
   1  -1 -13  39.208  13.578
   1  -1 -13  58.523  12.568
   0   1  13  30.340  13.258
   0   1  13  45.689  14.066
   0  -1 -13  53.094  12.847
   0  -1 -13  49.065  12.833
   0   1 -13  65.993  16.068
   0   1 -13  50.605  19.662
   0  -1  13  42.596  13.707
   1   1  13  234.99   29.54
   1   1  13  260.79   30.98
  -1  -1 -13  304.04   34.96
  -1  -1 -13  203.42   25.01
  -1   1 -13  229.09   27.66
  -1   1 -13  230.24   29.38
   1  -1  13  216.00   28.32
   1  -1  13  271.44   32.75
   2   1  13  12.631  16.928
   2   1  13  11.461  19.508
  -2  -1 -13  -10.83   18.88
  -2  -1 -13  -10.42   16.54
  -2   1 -13  16.954  18.314
  -2   1 -13  -26.76   23.22
   2  -1  13  -12.30   17.67
   2  -1  13  11.107  27.247
   2   2 -13  18.738  11.948
   2   2 -13   0.751  11.734
  -2  -2  13  -5.802   9.604
  -2   2  13  11.136   7.462
   2  -2 -13  9.1340  6.6365
   1   2 -13  936.11   94.98
  -1  -2  13  690.60   70.52
  -1  -2  13  800.33   81.51
  -1   2  13  892.22   89.81
  -1   2  13  916.74   92.93
   1  -2 -13 1097.18  111.04
   1  -2 -13  984.37   98.78
   0   2  13  231.78   27.36
   0   2  13  198.29   27.63
   0  -2 -13  253.99   29.94
   0  -2 -13  240.25   27.58
   0   2 -13  201.24   26.09
   0   2 -13  266.18   34.05
   0  -2  13  177.24   23.60
   0  -2  13  219.98   30.25
   1   2  13  48.012  15.786
   1   2  13  17.903  13.912
  -1  -2 -13  27.529  12.476
  -1  -2 -13  22.832  13.399
  -1   2 -13  38.451  14.733
  -1   2 -13  26.387  17.352
   1  -2  13  15.863  16.748
   1  -2  13  24.192  16.646
   2   2  13   7.946  19.456
   2   2  13  12.376  16.274
  -2  -2 -13  50.887  19.931
  -2  -2 -13  15.465  15.786
  -2   2 -13  17.198  19.020
  -2   2 -13  22.639  19.662
   2  -2  13  16.068  18.892
   2  -2  13  18.699  19.906
   2   3 -13  0.9750  8.6617
   2   3 -13   7.955  12.666
  -2  -3  13  13.476  10.865
  -2   3  13  4.6998  8.5205
   1   3 -13  43.161  13.630
   1   3 -13  19.546  12.582
  -1  -3  13  36.526  12.503
  -1  -3  13  44.059  13.681
  -1   3  13  36.821  10.127
  -1   3  13  42.224  11.481
   1  -3 -13  28.581   9.475
   1  -3 -13  34.960  11.049
   0   3  13  36.718  13.476
   0   3  13  37.694  12.784
   0  -3 -13  48.089  12.663
   0  -3 -13  42.532  11.929
   0   3 -13  32.496  15.516
   0   3 -13  31.341  16.197
   0  -3  13  23.140  15.260
   0  -3  13  25.835  15.491
   1   3  13   7.980  14.246
  -1  -3 -13   1.469  17.955
  -1   3 -13   7.512  17.775
   1  -3  13  15.234  17.005
   1  -3  13  27.747  22.267
   2   3  13  301.86   37.85
  -2  -3 -13  241.79   32.80
  -2   3 -13  205.09   38.63
  -2   3 -13  228.96   31.65
   2  -3  13  157.99   27.81
   2   4 -13  91.725  17.608
   2   4 -13  75.746  12.911
  -2  -4  13  73.385  13.578
  -2  -4  13  86.219  18.327
  -2   4  13  65.415  13.014
   1   4 -13 1185.10  119.38
   1   4 -13 1351.42  136.43
  -1  -4  13  973.98   98.73
  -1  -4  13 1197.42  120.20
  -1   4  13 1314.21  131.55
  -1   4  13 1392.49  138.86
   1  -4 -13 1618.37  161.20
   1  -4 -13 1346.29  134.37
   0   4  13  860.52   87.22
   0   4  13  747.97   76.64
   0  -4 -13  805.72   81.73
   0  -4 -13  852.05   86.18
   0   4 -13  729.62   75.94
   0   4 -13  770.81   79.66
   0  -4  13  659.54   69.03
   0  -4  13  771.33   79.73
   1   4  13  41.518  14.695
   1   4  13  51.118  15.350
  -1  -4 -13  48.628  13.720
  -1  -4 -13  42.712  13.014
  -1   4 -13  16.697  17.852
  -1   4 -13  31.828  19.084
   1  -4  13  22.896  17.531
   1  -4  13  41.069  17.300
   2   5 -13  294.67   34.10
   2   5 -13  337.28   38.49
  -2  -5  13  361.41   38.87
  -2  -5  13  343.05   37.77
  -2   5  13  263.35   28.31
   1   5 -13  55.777  15.799
   1   5 -13  50.374  14.926
  -1  -5  13  30.725  16.646
  -1  -5  13  64.966  15.516
  -1   5  13  75.041  14.836
   1  -5 -13  76.363  16.620
   1  -5 -13  75.451  13.309
   0   5  13  19.123  16.068
   0   5  13  -8.324  16.517
   0  -5 -13  20.098  19.084
   0  -5 -13  13.630  12.280
   0   5 -13  -8.455  17.031
   0   5 -13  29.364  22.254
   0  -5  13  11.480  20.727
   0  -5  13  -0.878  16.107
   1   5  13   0.320  19.367
   1   5  13  34.601  15.106
  -1  -5 -13  31.212  13.296
  -1  -5 -13  38.271  21.510
  -1   5 -13  27.118  17.955
  -1   5 -13  19.995  19.521
   1  -5  13  15.914  17.647
   1  -5  13  54.609  19.495
   2   6 -13  34.370  23.127
   2   6 -13  30.584  12.781
  -2  -6  13  45.753  19.059
  -2  -6  13  46.844  15.542
   1   6 -13  33.997  14.387
   1   6 -13  43.777  16.068
  -1  -6  13  34.524  15.427
  -1  -6  13  44.714  14.117
  -1   6  13  50.874  11.669
  -1   6  13  48.513  10.338
   1  -6 -13  46.536  12.350
   1  -6 -13  50.309  11.258
   0   6  13  127.13   18.55
   0   6  13  121.28   20.88
   0  -6 -13  106.30   14.94
   0  -6 -13  102.63   18.48
   0   6 -13  56.149  18.956
   0   6 -13  55.738  19.187
   0  -6  13  72.962  17.749
   0  -6  13  69.150  18.019
   1   6  13  51.477  15.362
   1   6  13  67.854  16.389
  -1  -6 -13  43.546  12.772
  -1  -6 -13  47.409  13.925
  -1   6 -13  39.503  28.620
  -1   6 -13  36.282  19.931
   1  -6  13  22.614  19.803
   1  -6  13  47.293  27.426
   2   7 -13  56.816  13.720
   2   7 -13  56.662  17.403
  -2  -7  13  40.979  13.745
  -2  -7  13  64.414  17.891
   1   7 -13  226.91   28.79
   1   7 -13  235.76   28.84
  -1  -7  13  201.75   26.80
  -1   7  13  262.20   28.52
  -1   7  13  278.37   29.98
   1  -7 -13  254.63   27.09
   1  -7 -13  320.59   34.32
   0   7  13  190.20   25.51
   0  -7 -13  196.10   22.69
   0  -7 -13  192.25   22.97
   0   7 -13  123.04   22.65
   0   7 -13  137.58   26.31
   0  -7  13  128.10   26.28
   0  -7  13  118.48   21.47
   1   7  13  104.79   22.77
  -1  -7 -13  117.93   21.01
  -1  -7 -13  120.73   26.16
  -1   7 -13  47.204  29.056
  -1   7 -13  94.125  23.769
   1  -7  13  63.066  31.020
   1  -7  13  85.744  22.819
   1   8 -13  175.31   25.58
  -1  -8  13  137.07   20.21
  -1   8  13  194.82   22.07
  -1   8  13  222.93   24.92
   1  -8 -13  172.36   21.64
   1  -8 -13  154.27   18.70
   0   8  13  13.450  11.098
   0   8  13   7.548  11.035
   0  -8 -13  9.7757  9.2739
   0  -8 -13  5.9563  9.8322
   0   8 -13   7.441  18.147
   0   8 -13  26.643  18.866
   0  -8  13   4.659  17.685
   0  -8  13  -26.26   18.19
   1   8  13  20.945  13.809
   1   8  13   9.088  13.912
  -1  -8 -13  -2.029  10.538
  -1  -8 -13  -4.446  12.663
  -1   8 -13  13.745  22.832
  -1   8 -13   6.196  20.740
   1  -8  13  -0.483  19.636
   1  -8  13  25.206  22.742
   1   9 -13  243.59   35.97
  -1  -9  13  240.25   33.97
  -1  -9  13  267.97   37.72
  -1   9  13  379.50   39.75
   1  -9 -13  374.24   39.03
   1  -9 -13  306.09   33.01
   0   9  13  37.860  11.186
   0  -9 -13  25.822  10.774
   0  -9 -13  46.369  10.914
   0   9 -13  43.738  21.548
   0   9 -13  38.682  19.161
   0  -9  13   5.646  19.187
   0  -9  13  21.625  18.147
   1   9  13  203.55   25.33
   1   9  13  149.26   21.06
  -1  -9 -13  170.18   22.74
  -1  -9 -13  161.20   20.28
  -1   9 -13  143.23   27.34
  -1   9 -13  93.945  33.510
   1  -9  13  123.45   32.96
   1  -9  13  98.155  26.631
   1  10 -13  78.442  22.010
   1  10 -13  73.667  17.249
  -1 -10  13  58.921  16.838
  -1 -10  13  58.048  22.229
  -1  10  13  128.60   20.06
   1 -10 -13  118.46   17.04
   0  10  13  87.220  16.248
   0  10  13  91.789  14.438
   0 -10 -13  84.987  14.579
   0 -10 -13  65.851  12.268
   0  10 -13  72.846  33.600
   0  10 -13  52.222  27.131
   0 -10  13  16.453  25.591
   0 -10  13  15.157  27.247
   0  11  13  171.46   22.99
   0  11  13  223.57   26.05
   0 -11 -13  176.60   21.45
   0 -11 -13  233.45   27.59
   0  11 -13  150.16   24.68
   0  11 -13  161.84   29.72
   0 -11  13  157.47   25.64
   0 -11  13  148.49   27.48
  -2   0  14  42.558  14.567
  -2   0  14  49.000  17.749
   2   0 -14  0.7684  9.2662
   2   0 -14   8.965  10.537
  -1   0  14  979.88   99.22
  -1   0  14  910.19   91.79
   1   0 -14 1143.13  114.90
   1   0 -14  830.11   84.13
   0   0 -14  253.86   32.15
   0   0 -14  312.00   36.10
  -1   0 -14  71.255  16.312
  -1   0 -14  59.499  18.212
   1   0  14  58.703  19.110
   1   0  14  55.071  17.300
   2   1 -14   6.525  11.189
   2   1 -14  4.1107  9.4741
  -2  -1  14  -10.84   16.94
  -2   1  14   5.016  13.501
  -2   1  14  14.040  12.684
   2  -1 -14  3.7309  9.5498
   2  -1 -14  -16.20   13.94
   1   1 -14  21.677  14.053
   1   1 -14  15.234  12.140
  -1  -1  14  21.921  11.880
  -1  -1  14   1.463  12.232
  -1   1  14   5.827  12.677
  -1   1  14  14.721  11.445
   1  -1 -14  19.841  16.684
   1  -1 -14   9.230  10.317
   0   1  14  52.928  15.516
   0   1  14  14.887  17.108
   0   1 -14  20.676  13.835
   0   1 -14  27.080  15.696
   0  -1  14  17.480  13.553
   0  -1  14   0.253  14.554
   1   1  14  194.95   26.46
   1   1  14  195.85   27.52
  -1  -1 -14  183.53   25.41
  -1  -1 -14  179.29   24.06
  -1   1 -14  186.22   25.62
   1  -1  14  214.59   29.58
   2   2 -14  99.708  18.725
  -2  -2  14  127.78   23.42
  -2   2  14  74.630  17.364
  -2   2  14  88.427  18.224
   2  -2 -14  126.30   18.37
   1   2 -14  11.307  13.181
   1   2 -14  13.065  15.260
  -1  -2  14  16.017  20.778
  -1  -2  14  -5.789  12.409
  -1   2  14   4.695  11.331
  -1   2  14   8.722  10.254
   1  -2 -14  -2.184  11.294
   1  -2 -14  -5.091   9.460
   0   2  14  734.24   76.23
   0   2  14  772.99   78.98
   0  -2 -14  690.09   70.81
   0  -2 -14  777.74   79.52
   0   2 -14  700.74   73.41
   0  -2  14  582.54   62.99
   0  -2  14  694.19   71.82
   1   2  14  128.34   21.27
   1   2  14  123.28   22.59
  -1  -2 -14  126.57   20.62
  -1  -2 -14  113.07   19.10
  -1   2 -14  137.97   24.40
  -1   2 -14  83.126  23.050
   1  -2  14  104.65   22.70
   1  -2  14  84.717  25.591
   2   3 -14  -3.105  10.686
   2   3 -14  10.387  14.015
  -2  -3  14  17.865  14.066
  -2  -3  14   1.375  14.400
  -2   3  14  13.039  13.681
  -2   3  14  14.464  17.210
   2  -3 -14  6.4440  8.8196
   1   3 -14  212.28   25.83
   1   3 -14  172.87   26.81
  -1  -3  14  142.33   20.96
  -1  -3  14  150.54   23.42
  -1   3  14  193.15   23.10
  -1   3  14  202.91   26.14
   1  -3 -14  182.89   21.23
   1  -3 -14  244.62   28.11
   0   3  14 2561.67  254.63
   0   3  14 2429.48  242.05
   0  -3 -14 2539.86  252.45
   0  -3 -14 2425.63  241.02
   0   3 -14 2697.71  268.49
   0   3 -14 2097.08  209.84
   0  -3  14 2145.85  214.07
   0  -3  14 2102.22  209.84
   1   3  14  543.01   58.05
   1   3  14  501.55   53.70
  -1  -3 -14  447.01   48.09
  -1  -3 -14  531.71   55.82
  -1   3 -14  373.98   42.80
  -1   3 -14  485.90   53.77
   1  -3  14  373.09   43.78
   1  -3  14  407.61   47.18
   2   4 -14  -9.714  10.985
   2   4 -14   0.056  14.990
  -2  -4  14   7.439  15.478
  -2  -4  14   9.457  13.309
  -2   4  14  -2.028  10.302
  -2   4  14  13.078  12.290
   2  -4 -14  2.0842  7.1486
   1   4 -14  63.901  18.224
   1   4 -14  87.656  17.429
  -1  -4  14  76.914  15.914
  -1  -4  14  57.496  15.337
  -1   4  14  86.822  16.145
  -1   4  14  81.368  14.182
   1  -4 -14  82.189  18.186
   1  -4 -14  82.497  12.547
   0   4  14  27.311  13.694
   0   4  14  19.405  12.778
   0  -4 -14  26.233  11.863
   0  -4 -14  20.753  11.733
   0   4 -14  -7.022  17.005
   0   4 -14  24.128  17.364
   0  -4  14  19.546  17.121
   0  -4  14  37.488  17.095
   1   4  14  98.822  19.816
   1   4  14  107.82   19.42
  -1  -4 -14  87.207  17.506
  -1  -4 -14  101.57   17.18
  -1   4 -14  70.780  21.600
  -1   4 -14  68.431  23.666
   1  -4  14  77.954  26.412
   1  -4  14  100.79   23.05
   1   5 -14  65.659  15.568
   1   5 -14  44.034  16.376
  -1  -5  14  71.704  15.285
  -1  -5  14  52.029  15.555
  -1   5  14  89.081  15.285
  -1   5  14  100.03   18.08
   1  -5 -14  119.25   17.70
   1  -5 -14  99.323  15.773
   0   5  14  105.93   17.04
   0   5  14  125.67   18.30
   0  -5 -14  108.18   16.22
   0  -5 -14  95.626  15.504
   0   5 -14  40.851  24.860
   0   5 -14  66.968  19.585
   0  -5  14  72.897  19.071
   1   5  14  -15.38   15.17
   1   5  14   5.964  14.849
  -1  -5 -14  -16.83   13.69
  -1  -5 -14  -11.64   11.30
  -1   5 -14   8.734  22.190
  -1   5 -14  -10.89   20.86
   1  -5  14  15.927  20.688
   1  -5  14   7.090  19.521
   1   6 -14   7.069  17.441
   1   6 -14   6.465  13.373
  -1  -6  14   7.473  14.939
  -1  -6  14  16.222  12.962
  -1   6  14  21.330   9.543
   1  -6 -14  22.344  13.437
   1  -6 -14  33.330  11.155
   0   6  14  419.42   44.91
   0  -6 -14  373.73   40.48
   0  -6 -14  382.84   42.11
   0   6 -14  292.49   35.29
   0   6 -14  276.45   34.65
   0  -6  14  273.37   33.79
   0  -6  14  269.77   33.60
   1   6  14  17.313  15.041
   1   6  14  13.476  14.644
  -1  -6 -14   2.410  11.140
  -1  -6 -14  19.046  13.720
  -1   6 -14  21.856  21.856
  -1   6 -14  -34.31   22.56
   1  -6  14   9.638  21.099
   1  -6  14  12.847  21.086
   1   7 -14  15.837  15.183
   1   7 -14   4.144  16.800
  -1  -7  14   5.687  13.335
  -1  -7  14  10.493  17.082
  -1   7  14  19.880   9.348
  -1   7  14   4.308  10.607
   1  -7 -14  17.557  10.158
   1  -7 -14  4.6665  9.2508
   0   7  14  11.960  14.810
   0   7  14  -3.581  12.539
   0  -7 -14  -2.695   9.232
   0  -7 -14  -2.695  13.835
   0   7 -14  -8.586  16.415
   0   7 -14  10.800  19.867
   0  -7  14  -13.81   17.15
   0  -7  14  -16.38   18.02
   1   7  14  13.784  19.726
   1   7  14   1.496  13.142
  -1  -7 -14  -4.565  10.787
  -1  -7 -14  -8.293  24.012
  -1   7 -14  -11.49   19.41
  -1   7 -14  19.431  21.664
   1  -7  14   7.043  18.224
   1  -7  14  -17.42   21.92
   1   8 -14   5.108  18.353
   1   8 -14  18.019  15.350
  -1  -8  14  15.414  18.109
  -1  -8  14   7.143  14.823
  -1   8  14  18.147  15.247
  -1   8  14  23.602  10.369
   1  -8 -14  30.686  10.668
   1  -8 -14  16.312   9.855
   0   8  14  28.196  11.787
   0   8  14  27.593  13.412
   0  -8 -14  11.549  10.904
   0  -8 -14  10.606   9.889
   0   8 -14  12.018  21.035
   0   8 -14  26.810  18.994
   0  -8  14  11.851  18.417
   0  -8  14   9.531  18.276
   1   9 -14  61.449  17.223
   1   9 -14  49.912  19.341
  -1  -9  14  51.696  20.727
  -1  -9  14  42.545  15.863
  -1   9  14  75.708  14.515
  -1   9  14  80.341  15.683
   1  -9 -14  93.804  15.901
   1  -9 -14  83.254  14.028
   0   9  14  19.675  11.223
   0   9  14  12.585  13.412
   0  -9 -14  19.059  10.791
   0  -9 -14   9.636  11.900
   0   9 -14   5.300  18.532
   0   9 -14  -5.390  32.573
   0  -9  14  -1.068  17.775
   0  -9  14  -46.34   26.75
  -1   0  15   9.568  13.258
  -1   0  15  -5.923  20.907
   1   0 -15  -14.48   16.71
   1   0 -15  21.805  15.812
   0   0 -15  10.405  13.476
   0   0 -15  -11.23   18.61
   0   0  15  10.353  14.810
   0   0  15  10.811  15.850
  -1   0 -15  10.159  17.672
  -1   0 -15  -4.607  16.466
   1   0  15  19.187  17.595
   1   0  15   4.201  17.570
   1   1 -15  108.81   17.02
   1   1 -15  153.50   21.87
  -1  -1  15  85.950  17.275
  -1  -1  15  141.17   19.85
  -1   1  15  163.63   25.04
  -1   1  15  143.10   21.38
   1  -1 -15  126.65   19.35
   1  -1 -15  123.27   22.27
   0   1  15   7.582  13.091
   0   1  15  -1.946  16.684
   0  -1 -15  31.597  15.106
   0  -1 -15  12.219  13.219
   0   1 -15  39.863  15.311
   0   1 -15  12.164  15.401
   0  -1  15  17.724  13.373
   0  -1  15  -9.986  15.914
   1   1  15  106.93   26.58
   1   1  15  88.439  19.867
  -1  -1 -15  99.258  23.948
  -1  -1 -15  104.12   20.33
  -1   1 -15  99.220  22.934
  -1   1 -15  92.700  20.996
   1  -1  15  73.462  20.996
   1  -1  15  76.799  21.985
   1   2 -15  167.23   25.78
   1   2 -15  154.27   22.72
  -1  -2  15  125.48   19.46
  -1  -2  15  125.66   20.19
  -1   2  15  140.53   22.23
  -1   2  15  186.86   26.77
   1  -2 -15  207.78   25.99
   1  -2 -15  113.14   19.05
   0   2  15 1374.53  138.35
   0  -2 -15 1361.69  137.07
   0  -2 -15 1688.96  169.02
   0  -2  15 1197.67  121.42
   1   2  15  456.12   49.80
   1   2  15  367.82   41.38
  -1  -2 -15  401.32   43.61
  -1  -2 -15  349.86   39.55
  -1   2 -15  329.06   39.64
  -1   2 -15  350.24   45.24
   1  -2  15  321.11   39.64
   1  -2  15  395.93   51.62
   1   3 -15  36.962  14.900
   1   3 -15  23.435  15.670
  -1  -3  15  -8.547  14.900
  -1  -3  15  -0.508  12.657
  -1   3  15   3.800  12.258
  -1   3  15  11.884  14.823
   1  -3 -15  -8.537  12.666
   0   3  15  87.708  18.725
   0   3  15  83.126  15.901
   0  -3 -15  74.591  15.273
   0  -3 -15  75.901  15.054
   0   3 -15  95.447  23.627
   0   3 -15  68.598  21.433
   0  -3  15  66.968  26.605
   1   3  15  138.22   21.55
   1   3  15  170.31   24.12
  -1  -3 -15  147.46   22.56
  -1  -3 -15  132.96   20.37
  -1   3 -15  89.004  22.819
  -1   3 -15  135.01   23.92
   1  -3  15  122.08   25.35
   1  -3  15  92.020  21.959
   1   4 -15  47.191  23.717
   1   4 -15  41.890  15.850
  -1  -4  15  54.801  17.121
  -1  -4  15  23.550  17.608
  -1   4  15  59.460  13.797
  -1   4  15  30.353  14.284
   1  -4 -15  55.340  13.861
   1  -4 -15  54.018  19.623
   0   4  15  306.86   37.78
   0   4  15  324.32   35.88
   0  -4 -15  293.64   33.00
   0  -4 -15  302.63   33.54
   0   4 -15  258.86   31.98
   0   4 -15  230.88   31.40
   0  -4  15  243.46   31.94
   0  -4  15  192.38   28.31
   1   4  15  465.23   52.22
   1   4  15  484.36   51.57
  -1  -4 -15  448.04   47.13
  -1   4 -15  335.10   41.31
   1  -4  15  396.57   47.00
   1   5 -15  374.88   42.58
   1   5 -15  556.36   58.79
  -1  -5  15  447.14   47.90
  -1   5  15  544.55   56.57
  -1   5  15  497.32   52.86
   0   5  15  404.40   44.75
   0   5  15  412.10   44.15
   0  -5 -15  359.61   38.94
   0  -5 -15  396.19   42.42
   0  -5  15  301.60   36.35
   1   6 -15   1.973  17.968
   1   6 -15   5.638  15.978
  -1  -6  15   2.567  18.545
  -1  -6  15   4.079  14.336
  -1   6  15  22.665  11.952
  -1   6  15  11.973  13.707
   1  -6 -15  42.571  13.245
   1  -6 -15  21.767  12.257
   0   6  15  22.562  14.644
   0   6  15  13.835  13.309
   0  -6 -15  12.860  12.011
   0  -6 -15  -2.763  15.504
   0   6 -15  -1.813  18.866
   0   6 -15   5.664  16.594
   0  -6  15  24.654  16.684
   0  -6  15  -10.68   17.90
   0   7  15  169.67   27.26
   0   7 -15  66.891  18.404
   0   7 -15  93.830  21.317
   0  -7  15  92.418  20.483
   0  -7  15  62.733  18.802
  -1   0  16  100.46   17.49
  -1   0  16  103.90   18.47
   1   0 -16  55.597  16.081
   1   0 -16  109.67   17.33
   0   0 -16  57.702  16.941
   0   0 -16  99.169  20.483
   0   0  16  68.174  17.570
   0   0  16  104.52   21.98
   1   1 -16   3.780  14.836
   1   1 -16  10.669  13.809
  -1  -1  16  -14.77   12.01
  -1  -1  16   4.960  14.515
  -1   1  16   4.127  12.150
  -1   1  16   0.314  15.516
   1  -1 -16   5.381  11.933
   1  -1 -16  -6.873  14.105
   0   1  16  34.755  32.149
   0   1  16  -0.182  14.143
   0  -1 -16  -10.65   22.41
   0  -1 -16   9.460  15.324
   0   1 -16  -4.305  20.907
   0   1 -16   3.972  19.251
   0  -1  16   7.992  18.751
   0  -1  16  10.458  15.709
   0   2  16  10.764  19.225
   0   2  16  10.661  14.477
   0  -2 -16   2.608  16.659
   0  -2 -16   5.540  14.849
   0   2 -16  15.401  16.915
   0   2 -16  24.629  16.736
   0  -2  16  16.415  14.143
   0  -2  16  -6.561  18.725
   0  -3 -16  97.949  19.662
   0   3 -16  44.200  24.308
   0   3 -16  50.592  18.648
   0  -3  16  46.652  21.009
   0  -3  16  44.380  21.574
   0   0   0    0.00    0.00   0
;
_shelx_hkl_checksum   23373
